# Supplementary material for: Epigenetic regulation of mammalian Hedgehog signaling to the stroma determines the molecular subtype of bladder cancer
Source: eLife. 2019 Apr 30;8:e43024. doi: 10.7554/eLife.43024 (PMC6597241; doi:10.7554/eLife.43024)
Supplement: Figure 1—source data 1. [file elife-43024-fig1-data1.xlsx]

## Sheet: 1C-qRT
	Figure 1C. Expression of Shh in BBN tumor treated with 5'-azacitidine
	Shh/Hprt	Control	5'-azacitidine
	1	0.006364	0.569375
	2	0.000638	0.425245
	3	0.142738	0.680664
			P value=0.0043
	Experiments were done with 3 independent samples obtained for independent animals.
	Each experiment was repeated three times (technical replicates).

## Sheet: 1F-qRT
	Figure 1F. Expression of Shh in cultured tumor organoids treated with 5’-azacitidine
	Shh/Hprt	Control	5'-azacitidine
	1	0.0176338	0.0937979
	2	0.0132768	0.156503
	3	0.0101577	0.156334
			P value=0.0007
	Experiments were done with 3 independent samples obtained for independant animals.
	Each experiment was repeated three times (technical replicates).
