# Supplementary material for: Epigenetic regulation of mammalian Hedgehog signaling to the stroma determines the molecular subtype of bladder cancer
Source: eLife. 2019 Apr 30;8:e43024. doi: 10.7554/eLife.43024 (PMC6597241; doi:10.7554/eLife.43024)
Supplement: Figure 3—source data 1. [file elife-43024-fig3-data1.xlsx]

## Sheet: 3E
	Figure 3E. Size of bladder tumor organoids in the absence or presence of Bmp4 protein
	Control (㎛)			Bmp4 (㎛)
	Day 4	Day 6	Day 8	Day 4	Day 6	Day 8
	60	80	100	50	40	60
	40	100	120	20	50	90
	40	90	100	20	90	110
	40	100	100	20	50	90
	40	80	110	30	60	80
	50	100	100	30	40	70
	50	100	100	20	90	100
	50	80	110	20	70	90
	40	80	110	30	90	110
	50	100	120	30	100	100
	50	100	100	40	90	100
	60	60	100	50	100	110
	40	90	100	50	80	90
	40	80	100	50	50	100
	40	100	100	50	70	100
	30	100	90	50	90	110
	40	90	100	30	70	80
	40	70	90	30	50	80
	40	100	140	30	70	100
	30	100	110	40	50	110
	30	70	100	40	70	80
	30	60	110	40	90	90
	30	80	110	30	70	100
	60	90	120	30	70	80
	60	80	100	30	70	80
	50	90	90	20	50	80
	30	80	90	20	50	100
	30	80	90	30	70	80
	30	70	110	30	70	100
	30	90	100	30	50	80
	50	70	100	30	50	100
	50	80	120	30	60	90
	50	90	90	50	90	110
	40	80	100	20	80	90
	40	80	100	50	80	110
	40	70	110	40	70	90
	40	90	90	40	80	90
	40	80	90	30	50	50
	40	90	120	30	50	80
	50	60	100	30	80	100
	60	100	100	40	100	100
	50	80	110	40	80	90
	50	80	90	40	90	100
	50	80	110	40	80	80
	50	90	110	30	80	100
	40	90	150	30	60	90
	40	80	80	40	80	90
	50	100	100	30	60	90
	50	70	80	30	80	110
	50	100	90	30	50	100
	40	70	100	40	40	70
	40	100	100	50	40	70
	40	70	100	40	30	60
	30	80	110	40	90	80
	50	80	90	30	80	100
	50	80	100	40	90	50
	30	80	100	50	70	100
	60	80	100	40	70	80
	50	80	100	30	80	80
	30	60	120	40	80	90
	30	80	80	40	80	50
	30	100	90	40	50	90
	40	90	90	30	90	60
	40	80	80	50	90	110
	50	80	90	40	70	100
	50	70	100	30	90	100
	50	90	110	30	50	90
	40	70	90	30	50	70
	40	70	100	30	60	100
	40	80	120	30	90	50
	30	80	100	30	90	80
	30	90	90	30	80	90
	30	110	80	30	70	90
	30	90	80	30	80	90
	30	80	80	50	90	100
	50	70	110	20	90	100
	50	80	100	30	80	100
	50	60	100	30	50	80
	50	80	100	30	80	90
	50	100	150	50	60	90
	30	110	90	30	70	100
	30	80	100	30	90	80
	30	90	100	30	80	90
	30	70	90	50	70	80
	40	80	100	50	90	100
	40	100	90	50	80	100
	40	80	90	50	50	100
	60	70	80	40	90	90
	60	100	110	40	80	100
	50	80	100	30	80	80

## Sheet: 3F
	Figure 3F. Quantification of cell proliferation in tumor organoids cultured for 6 days in the absence or presence of Bmp4
		Control	Bmp4		Control (%)	Bmp4 (%)
	DAPI	966	916		69.1511	19.5415
		962	955		73.7006	19.3717
		925	960		63.2432	21.1458
	Ki67	668	179			P value<0.0001
		709	185
		585	203
