# Supplementary material for: Epigenetic regulation of mammalian Hedgehog signaling to the stroma determines the molecular subtype of bladder cancer
Source: eLife. 2019 Apr 30;8:e43024. doi: 10.7554/eLife.43024 (PMC6597241; doi:10.7554/eLife.43024)
Supplement: Figure 4—source data 1. [file elife-43024-fig4-data1.xlsx]

## Sheet: 4F-qRT
	Figure 4F. Expression of the luminal markers in tumor allografts from mice with the vehicle control or 5’-azaciditine treatment
	Gene expression normalized to a basal marker (Krt5)
	Upk1a/Krt5	Control	5'-azacitidine		Upk1b/Krt5	Control	5'-azacitidine		Upk2/Krt5	Control	5'-azacitidine		Upk3a/Krt5	Control	5'-azacitidine
	1	0.015297	0.063092		1	0.031175	0.049692		1	0.031364	0.128724		1	0.016481	0.084921
	2	0.009698	0.058205		2	0.014169	0.032358		2	0.032518	0.098474		2	0.01247	0.059554
	3	0.045597	0.056131		3	0.023306	0.048968		3	0.103361	0.088206		3	0.050548	0.048967
	4	0.03501	0.077205		4	0.023964	0.038474		4	0.077183	0.210748		4	0.037569	0.1182
	5	0.017621	0.06491		5	0.011916	0.035812		5	0.047889	0.132201		5	0.017121	0.07263
	6	0.02031	0.043693		6	0.01127	0.024907		6	0.069131	0.074881		6	0.034627	0.045008
			P value=0.0005				P value=0.004				P value=0.0277				P value=0.0066
	Upk3b/Krt5	Control	5'-azacitidine		Krt20/Krt5	Control	5'-azacitidine		Krt18/Krt5	Control	5'-azacitidine
	1	0.001574	0.006854		1	0.004122	0.00481		1	0.051066	0.102558
	2	0.001613	0.004021		2	0.002367	0.005055		2	0.051626	0.084339
	3	0.003813	0.00502		3	0.003149	0.00587		3	0.078404	0.134182
	4	0.003919	0.005148		4	0.004246	0.004238		4	0.061794	0.246641
	5	0.001888	0.003945		5	0.002	0.004666		5	0.047065	0.127426
	6	0.001007	0.002944		6	0.001696	0.002141		6	0.077781	0.081709
			P value=0.0104				P value=0.0476				P value=0.024
	Gene expression normalized to HPRT (before normalizing to a basal marker, Krt5)
	Upk1a/Hprt	Control	5'-azacitidine		Upk1b/Hprt	Control	5'-azacitidine		Upk2/Hprt	Control	5'-azacitidine		Upk3a/Hprt	Control	5'-azacitidine
	1	0.118643	0.789776		1	0.241782	0.622037		1	0.243249	1.61135		1	0.127821	0.127821
	2	0.075213	0.666699		2	0.109895	0.370638		2	0.252199	1.12795		2	0.096718	0.096718
	3	0.353643	0.478819		3	0.180757	0.41772		3	0.801643	0.752435		3	0.392039	0.392039
	4	0.271529	0.317713		4	0.185861	0.158327		4	0.598609	0.867266		4	0.291373	0.291373
	5	0.136666	0.82106		5	0.092416	0.45299		5	0.371417	1.67224		5	0.132787	0.132787
	6	0.157521	0.587026		6	0.087405	0.334631		6	0.536161	1.00605		6	0.268557	0.268557
	Upk3b/Hprt	Control	5'-azacitidine		Krt20/Hprt	Control	5'-azacitidine		Krt18/Hprt	Control	5'-azacitidine		Krt5/Hprt	Control	5'-azacitidine
	1	0.012206	0.085804		1	0.031967	0.060208		1	0.396052	1.28381		1	7.75575	12.5179
	2	0.012506	0.046063		2	0.018361	0.057901		2	0.400402	0.966042		2	7.04596	11.4543
	3	0.029574	0.04282		3	0.024424	0.050073		3	0.608082	1.14464		3	7.47903	8.53047
	4	0.030397	0.021184		4	0.032929	0.017439		4	0.479258	1.01497		4	9.12267	4.11519
	5	0.014641	0.049899		5	0.015514	0.059027		5	0.365024	1.61184		5	5.32182	12.6493
	6	0.007807	0.039558		6	0.013151	0.028769		6	0.603249	1.0978		6	1.9582	13.4354
	Experiments were done with 6 independent samples obtained for independent animals.
	Each experiment was repeated three times (technical replicates).
