# Supplementary material for: Epigenetic regulation of mammalian Hedgehog signaling to the stroma determines the molecular subtype of bladder cancer
Source: eLife. 2019 Apr 30;8:e43024. doi: 10.7554/eLife.43024 (PMC6597241; doi:10.7554/eLife.43024)
Supplement: Figure 5—source data 1. [file elife-43024-fig5-data1.xlsx]

## Sheet: 5C-qRT
	Figure 5C. Expression of the luminal markers in tumor allografts
	Upk1a/Hprt	Control	siRNA for Shh	siRNA for Bmpr1a		Upk2/Hprt	Control	siRNA for Shh	siRNA for Bmpr1a
	1	0.737599	0.61653	0.792141		1	1.2862	0.653876	1.07719
	2	1.14081	0.714154	0.611587		2	1.39508	0.719997	0.844215
	3	0.844706	0.656993	0.611557		3	1.26779	0.568909	0.919705
	4	1.08784	0.523857	0.681245		4	1.35981	0.625323	0.734602
	5	1.15836	0.530263	0.614672		5	1.47856	0.582823	1.04889
			P value=0.0002	P value=0.0025				P value<0.0001	P value=0.0012
	Upk3a/Hprt	Control	siRNA for Shh	siRNA for Bmpr1a		Krt18/Hprt	Control	siRNA for Shh	siRNA for Bmpr1a
	1	0.414127	0.192485	0.30513		1	5.28171	2.79565	3.3046
	2	0.530651	0.305114	0.325099		2	3.08728	2.91248	2.6075
	3	0.351969	0.204282	0.352573		3	4.6022	3.16092	2.60403
	4	0.629317	0.254223	0.331873		4	5.20911	3.92987	2.84265
	5	0.594795	0.25198	0.343566		5	3.72534	2.0151	2.55901
			P value<0.0001	P value=0.0136				P value=0.013	P value=0.0043
	Experiments were done with 5 independent samples obtained for independent animals.
	Each experiment was repeated three times (technical replicates).

## Sheet: 5E, F
	Figure 5E and 5F. EGFP or mCherry-positive tumor areas (pixels2)
		siRNA for Shh				siRNA for Bmpr1a
		EGFP	mCherry			EGFP	mCherry
	1	126834	654427		1	710765	1.67553e+06
	2	625309	1.70795e+06		2	462227	1.78251e+06
	3	209258	990120		3	1.38568e+06	2.00539e+06
	4	34282.2	1.76788e+06		4	1.08714e+06	1.95965e+06
