# Supplementary material for: Epigenetic regulation of mammalian Hedgehog signaling to the stroma determines the molecular subtype of bladder cancer
Source: eLife. 2019 Apr 30;8:e43024. doi: 10.7554/eLife.43024 (PMC6597241; doi:10.7554/eLife.43024)
Supplement: Figure 6—source data 1. [file elife-43024-fig6-data1.xlsx]

## Sheet: 6C-qRT
	Figure 6C. Expression of SHH in J82, T24, and TCC-SUP treated with 5’-azacitidine
	J82				T24				TCC-SUP
	SHH/HPRT	Control	5'-azacitidine		SHH/HPRT	Control	5'-azacitidine		SHH/HPRT	Control	5'-azacitidine
	1	0.00163669	0.0531421		1	0.000620191	0.0749463		1	0.00248076	0.0217778
	2	0.000307527	0.0539961		2	0.000507959	0.0615542		2	0.00300171	0.0216123
	3	0.00712448	0.0645697		3	0.0011048	0.0679209		3	0.00269033	0.0298733
			P value=0.0002				P value< 0.0001				P value=0.0014
	Each experiment was repeated three times (technical replicates).

## Sheet: 6F-qRT
	Figure 6F. Expression of the luminal markers and basal markers in tumors xenografts from mice treated with 5’-azacitidine
	Luminal markers								Basal markers
	FOXA1/HPRT	Control	5'-azacitidine		GATA3/HPRT	Control	5'-azacitidine		CDH3/HPRT	Control	5'-azacitidine		KRT6A/HPRT	Control	5'-azacitidine
	1	0.012307	0.021853		1	0.015928	0.019869		1	0.020665	0.063758		1	0.010487	0.044234
	2	0.007075	0.010038		2	0.007846	0.011626		2	0.146208	0.009065		2	0.145609	0.004662
	3	0.008631	0.028265		3	0.006552	0.020746		3	0.157284	0.018246		3	0.140713	0.006712
	4	0.013473	0.017011		4	0.010418	0.01317		4	0.138156	0.004459		4	0.116098	0.002192
	5	0.008335	0.008726		5	0.006091	0.0123804		5	0.010698	0.001982		5	0.005838	0.00075
	6	0.008593	0.016196		6	0.007153	0.01459		6	0.119272	0.002513		6	0.099201	0.000273
			P value=0.0442				P value=0.016				P value=0.0164				P value=0.0164
	Experiments were done with 6 independent samples obtained for independent animals.
	Each experiment was repeated three times (technical replicates).

## Sheet: 6H-qRT
	Figure 6H. Expression of the luminal markers and basal markers in tumors xenografts
	SHH/HPRT	Control	siRNA for SHH		BMPR1A/HPRT	Control	siRNA for BMPR1A
	1	0.053873	0.011097		1	0.226273	0.147963
	2	0.035602	0.002608		2	0.167111	0.12096
	3	0.08246	0.008517		3	0.291918	0.11681
	4	0.037671	0.015807		4	0.173477	0.154127
	5	0.015214	0.007838		5	0.18522	0.134688
	6	0.019249	0.00563		6	0.172816	0.143771
			P value=0.0108				P value=0.0096
	Experiments were done with 6 independent samples obtained for independent animals.
	Each experiment was repeated three times (technical replicates).

## Sheet: 6I-qRT
	Figure 6I. Expression of the luminal markers and basal markers in tumors xenografts
	Luminal markers
	FOXA1/HPRT	Control	siRNA for SHH	siRNA for BMPR1A		GATA3/HPRT	Control	siRNA for SHH	siRNA for BMPR1A
	1	0.369257	0.153574	0.062461		1	0.006586	0.002604	0.003647
	2	0.224737	0.064433	0.032984		2	0.014448	0.003523	0.004996
	3	0.100867	0.02253	0.1336		3	0.00504	0.003942	0.006313
	4	0.086579	0.109739	0.053171		4	0.009147	0.003705	0.002562
	5	0.147419	0.096952	0.039783		5	0.008151	0.003568	0.004765
	6	0.216372	0.025274	0.060697		6	0.004198	0.005383	0.000574
			P value=0.0398	P value=0.0182				P value=0.0235	P value=0.0376
	Basal markers
	CDH3/HPRT	Control	siRNA for SHH	siRNA for BMPR1A		KRT6A/HPRT	Control	siRNA for SHH	siRNA for BMPR1A
	1	0.004691	0.005894	0.020235		1	0.001927	0.002466	0.012679
	2	0.003647	0.014023	0.022354		2	0.001916	0.004225	0.014022
	3	0.007524	0.004671	0.005182		3	0.000915	0.003041	0.009107
	4	0.004135	0.004912	0.006835		4	0.001721	0.006758	0.006027
	5	0.002267	0.014905	0.018458		5	0.000945	0.00264	0.009939
	6	0.002153	0.011307	0.024124		6	0.001084	0.002352	0.009637
			P value=0.0309	P value=0.0053				P value=0.0134	P value<0.0001
	Experiments were done with 6 independent samples obtained for independent animals.
	Each experiment was repeated three times (technical replicates).
