# Supplementary material for: Epigenetic regulation of mammalian Hedgehog signaling to the stroma determines the molecular subtype of bladder cancer
Source: eLife. 2019 Apr 30;8:e43024. doi: 10.7554/eLife.43024 (PMC6597241; doi:10.7554/eLife.43024)
Supplement: Figure 7—source data 1. [file elife-43024-fig7-data1.xlsx]

## Sheet: 7A-qRT
	Figure 7A. Expression of luminal and basal markers in human invasive urothelial carcinomas from ten patients.
		Luminal markers					Basal markers
	P-1	UPK1A	UPK2	ERBB2	FOXA1	GATA3	KRT5	KRT14	CD44	KRT6A
	1	0.031271	0.024022	0.010587	0.009435	0.028407	55.1917	85.984	1.15571	10.6733
	2	0.048368	0.017049	0.035492	0.009528	0.020351	17.6043	78.2669	0.93425	10.705
	3	0.050687	0.018281	0.037662	0.007598	0.021539	17.646	70.0071	0.987699	10.6557
		Luminal markers					Basal markers
	P-2	UPK1A	UPK2	ERBB2	FOXA1	GATA3	KRT5	KRT14	CD44	KRT6A
	1	0.049845	0.059467	0.230787	0.001779	0.00558	0.001972	0.006152	2.06994	0.125619
	2	0.043413	0.074247	0.247157	0.003198	0.008248	0.004722	0.003884	2.27251	0.149103
	3	0.034046	0.058795	0.222418	0.001475	0.003664	0.000824	0.004897	2.07576	0.111677
		Luminal markers					Basal markers
	P-3	UPK1A	UPK2	ERBB2	FOXA1	GATA3	KRT5	KRT14	CD44	KRT6A
	1	0.411158	2.16619	1.39388	0.118895	1.82211	0.045448	0.031604	0.07033	0.062005
	2	0.583559	1.9353	1.16098	0.127159	1.29844	0.046459	0.041699	0.103435	0.069115
	3	0.605601	2.15604	1.27817	0.118568	1.31708	0.050729	0.057852	0.107873	0.070001
		Luminal markers					Basal markers
	P-4	UPK1A	UPK2	ERBB2	FOXA1	GATA3	KRT5	KRT14	CD44	KRT6A
	1	0.018002	0.004021	0.140758	0.145316	0.008861	20.3799	7.78746	2.17428	17.0066
	2	0.021286	0.004598	0.139	0.158167	0.010768	22.762	7.91936	2.1032	19.7367
	3	0.019341	0.00387	0.603912	0.146992	0.009618	23.3417	7.66273	2.62316	18.0904
		Luminal markers					Basal markers
	P-5	UPK1A	UPK2	ERBB2	FOXA1	GATA3	KRT5	KRT14	CD44	KRT6A
	1	0.026793	1.84054	0.552898	0.005656	1.23209	6.26826	39.4717	0.888058	3.16004
	2	0.019296	1.80104	0.507398	0.006396	1.19392	5.74618	35.7232	0.838515	3.10307
	3	0.019874	1.18161	0.578569	0.005945	0.963761	6.20484	33.6261	0.969299	2.84366
		Luminal markers					Basal markers
	P-6	UPK1A	UPK2	ERBB2	FOXA1	GATA3	KRT5	KRT14	CD44	KRT6A
	1	0.104975	5.1748	0.188368	0.470771	0.120994	11.8456	3.89928	0.489635	16.8691
	2	0.096928	5.17929	0.160507	0.466431	0.12541	12.303	3.87136	0.456168	15.8969
	3	0.121938	5.50075	0.178595	0.489751	0.120404	15.6907	3.89464	0.472015	16.4146
		Luminal markers					Basal markers
	P-7	UPK1A	UPK2	ERBB2	FOXA1	GATA3	KRT5	KRT14	CD44	KRT6A
	1	0.191569	0.746154	0.023754	0.013847	1.49351	0.033277	0.036824	0.255578	0.427961
	2	0.207932	0.716766	0.020084	0.012434	1.51442	0.037254	0.041151	0.253823	0.519587
	3	0.184372	0.729363	0.019522	0.009901	1.4883	0.038994	0.036736	0.245113	0.393203
		Luminal markers					Basal markers
	P-8	UPK1A	UPK2	ERBB2	FOXA1	GATA3	KRT5	KRT14	CD44	KRT6A
	1	0.381489	2.29729	0.980242	0.489506	0.485595	0.062361	0.485634	0.002799	0.377125
	2	0.398474	2.10623	0.957665	0.454143	0.488852	0.058902	0.494182	0.003834	0.38914
	3	0.410637	2.18714	0.993104	0.480648	0.501968	0.064897	0.47964	0.002873	0.381161
		Luminal markers					Basal markers
	P-9	UPK1A	UPK2	ERBB2	FOXA1	GATA3	KRT5	KRT14	CD44	KRT6A
	1	1.66491	1.62888	4.31241	3.36281	1.79325	0.244107	0.848891	0.000701	0.053328
	2	1.98608	2.15399	4.70786	4.04347	2.0866	0.275441	0.969283	0.000831	0.065926
	3	1.60547	1.97406	3.92671	3.14647	1.71223	0.233625	0.810992	0.000594	0.054733
		Luminal markers					Basal markers
	P-10	UPK1A	UPK2	ERBB2	FOXA1	GATA3	KRT5	KRT14	CD44	KRT6A
	1	0.034631	0.069622	0.407799	0.496334	0.005141	23.252	0.123064	0.000861	14.2729
	2	0.033485	0.054404	0.357127	0.498338	0.004721	19.6984	0.117141	0.000604	13.0698
	3	0.032251	0.057753	0.345446	0.529707	0.005071	21.036	0.120191	0.000896	13.5005
	Each experiment was repeated three times (technical replicates).

## Sheet: 7B-qRT
	Figure 7B. Expression of SHH in benign urothelium and two subtypes of invasive urothelial carcinomas (basal, luminal) from patients
		Basal subtype						Luminal subtype				Benign
	SHH/HPRT	P-1	P-2	P-4	P-5	P-6	P-10	P-3	P-7	P-8	P-9	P-6
	1	0.031936	0.149408	0.122385	0.00579	0.089185	0.187073	0.65671	0.566188	0.297629	0.41565	0.951708
	2	0.048368	0.137837	0.106889	0.007921	0.123331	0.199269	0.569534	0.550269	0.27941	0.489968	0.817209
	3	0.050687	0.110992	0.122385	0.007097	0.1434	0.203262	0.597915	0.539898	0.310455	0.393251	0.975629
	Each experiment was repeated three times (technical replicates).

## Sheet: 7E-Clinical Outcome
	Figure 7E. Clinical outcome of bladder cancer patients (SNU cohort), expression level of SHH and mRNA subgroup classification
	patient number	survival duration	death	18S	SHH	SHH/18S	mRNA subgroup
	20754488	1	1	0.052	0	0	low-SHH
	44503097	18	1	1.207	0.003	0.0024855	low-SHH
	48323426	14	1	1.97	0.008	0.00406091	low-SHH
	26002008	19	0	2.747	0.012	0.0043684	low-SHH
	47233328	27	0	1.785	0.009	0.00504202	low-SHH
	30417863	46	0	2.79	0.018	0.00645161	low-SHH
	47973626	8	0	1.003	0.007	0.00697906	low-SHH
	32339705	15	0	1.223	0.009	0.00735895	low-SHH
	30682218	18	0	0.784	0.006	0.00765306	low-SHH
	20309439	34	0	0.616	0.005	0.00811688	low-SHH
	38364987	15	1	0.35	0.003	0.00857143	low-SHH
	24049140	26	0	0.204	0.002	0.00980392	low-SHH
	46874447	28	0	0.992	0.011	0.0110887	low-SHH
	48409779	16	0	0.24	0.006	0.025	low-SHH
	42536969	42	0	0.447	0.013	0.0290828	low-SHH
	41624762	44	1	1.383	0.044	0.0318149	low-SHH
	45602593	33	0	0.031	0.001	0.0322581	low-SHH
	29644672	20	1	0.666	0.027	0.0405405	low-SHH
	46896632	30	0	0.419	0.036	0.0859189	low-SHH
	40154291	22	1	0.28	0.025	0.0892857	low-SHH
	44755843	47	0	3.07	0.371	0.120847	low-SHH
	37675949	45	0	0.056	0.008	0.142857	low-SHH
	27507311	50	0	0.494	0.078	0.157895	low-SHH
	46952044	27	0	0.288	0.048	0.166667	low-SHH
	23374526	45	0	0.174	0.03	0.172414	low-SHH
	28348779	2	1	1.303	0.23	0.176516	low-SHH
	45319079	7	1	0.028	0.006	0.214286	low-SHH
	23796001	48	0	3.197	0.705	0.220519	low-SHH
	32279050	40	0	0.925	0.209	0.225946	low-SHH
	36332162	17	1	0.047	0.011	0.234043	low-SHH
	43003671	46	0	2.633	0.758	0.287885	low-SHH
	28914563	44	0	0.061	0.018	0.295082	high-SHH
	44787198	41	0	0.28	0.083	0.296429	high-SHH
	32820960	15	0	0.012	0.007	0.583333	high-SHH
	44259840	44	0	1.503	1.433	0.953426	high-SHH
	47053654	27	0	0.049	0.049	1	high-SHH
	34960927	42	0	0.91	1.183	1.3	high-SHH
	44197113	45	0	3.043	5.063	1.66382	high-SHH
	35426172	26	0	0.856	1.653	1.93107	high-SHH
	43888517	48	0	1.967	4.09	2.07931	high-SHH
	44360384	46	0	3.843	8.48	2.20661	high-SHH

## Sheet: 7E-logrank-test
	Figure 7E. Log-rank test statistics of mRNA subgroup (SNU cohort)
			Survival months at % mortality			Log-rank test P-value
	Name	No. of subjects	25%	50%		Condition	P-value
	Low SHH	31	22	0		low SHH vs. high SHH	0.0422
	High SHH	10	0	0

## Sheet: 7F-Clinical Outcome
	Figure 7F.Clinical outcome of bladder cancer patients (TCGA MIBC cohort), expression levels and mRNA subgroup classification
	Note that gene expression levels were z-score converted (see Methods)
	Patient ID	Survival Months	Survival Status	mRNA subtype classification	KRT18	UPK1B	FOXA1	KRT20	GATA3	PPARG	UPK3A	UPK2	UPK1A	SHH	BMP5	ACTG2	CNN1	MYH11	ACTC1	FLNC	MFAP4	PCP4	BMP4	KRT1	CD44	CDH3	KRT14	KRT5	KRT6A	KRT6B	GSDMC	PI3	TGM1	DSC3	TP63
	TCGA-XF-A9ST-01	4.2	DECEASED	basal	0.971731	-0.773314	-1.40241	-1.12503	0.904116	0.269243	-0.622574	-1.2441	-0.655003	-0.0822	0.175113	-0.491702	-0.680429	-0.759499	-0.001708	0.617539	-0.874613	-0.26818	0.602346	-2.26859	-2.87493	-0.66129	-0.76832	-0.816937	-0.378452	0.183377	-1.03231	-0.284349	0.770352	0.871789	-0.403631
	TCGA-XF-A8HD-01	97.37	LIVING	basal	0.751288	0.885203	-0.9203	-1.50083	0.740408	1.28662	-0.164761	-0.302109	-3.64642	-2.58812	-0.755781	0.022316	0.104207	-0.027605	-0.212109	-0.082255	0.013166	-0.152374	-0.683172	-0.867998	-0.002413	0.301683	0.98064	-2.1339	-0.554382	-0.871655	1.06936	-0.875974	-0.447743	-1.11696	-3.39193
	TCGA-FD-A6TH-01	4.3	DECEASED	basal	0.889929	1.13072	-3.57584	-0.632427	0.179011	0.562507	-0.335303	0.609486	-1.49939	-0.751993	-0.139211	-0.486058	-0.363713	-0.726188	-0.488286	0.110656	0.196951	0.125143	-0.884549	0.050792	-1.27555	-1.38739	-0.888006	-0.428329	0.186063	-0.431518	-0.387213	-1.32321	-1.18556	-1.56246	-1.2448
	TCGA-ZF-A9RF-01	64.03	LIVING	basal	1.01581	-1.59207	-0.212828	-0.325038	0.228842	0.231258	-1.0477	-1.62084	-1.32352	-0.704626	-0.319883	-1.75517	-2.06772	-1.76202	-0.769863	0.752116	-0.158284	-2.16784	-1.56421	-0.281188	0.969692	-2.22565	-1.25782	-1.63314	-0.881	-0.673151	-0.723962	-0.353129	-0.423974	-1.67378	-2.65277
	TCGA-E7-A7DV-01	1.22	LIVING	basal	0.977128	-0.434252	-1.04887	-0.296166	-0.171258	0.014177	-0.321474	-0.089063	-0.879001	-0.494455	-0.42815	-0.823809	-1.064	-1.47818	0.076948	-0.747655	0.581975	-2.16784	-0.303674	-0.853669	2.10151	-0.558272	-0.222234	-1.2827	-1.47027	-2.03862	0.999972	-0.135549	-0.592041	-3.12971	-1.35449
	TCGA-4Z-AA84-01	15.11	LIVING	basal	0.668167	0.445194	-1.28527	-0.040247	0.274904	0.661505	-1.35562	-0.730494	-0.858354	-0.268229	-0.025731	-1.09443	-1.11573	-0.996335	-0.283192	-0.528582	-0.968321	-0.358928	-1.09003	-2.26859	2.07872	-0.973501	-0.579264	-0.654817	0.24138	-0.351375	0.867535	-0.111915	-0.068356	-0.974631	-1.03727
	TCGA-UY-A78L-01	37.02	LIVING	basal	0.791903	-0.922349	-0.922508	0.388522	-0.661715	-0.049713	-1.22967	-1.38915	-1.63268	0.361451	-0.293901	0.34785	0.167407	-0.199953	0.383216	0.19646	-0.349052	0.339467	-0.521169	0.895492	0.945688	1.20856	0.356432	0.825037	1.25236	1.3223	0.478731	1.15963	1.92536	-1.3733	-2.73792
	TCGA-XF-A9SX-01	23.62	DECEASED	basal	2.3771	-0.525779	-0.385066	-0.593922	-0.060449	-0.704884	-0.765236	-0.054118	-1.36922	-1.07529	-2.55859	0.167623	0.189332	-1.34107	-0.110917	1.13318	0.58172	-2.16784	0.709899	-0.064198	0.008727	-0.069248	-0.605268	-0.849123	-0.528625	-0.395912	-0.674558	-0.246186	0.39756	-0.076146	-3.25357
	TCGA-FD-A5BT-01	10.78	DECEASED	basal	2.2184	0.165627	-3.18576	-0.738533	0.099752	-0.386564	-0.565771	0.399354	-1.57027	-0.146283	-2.55859	0.375422	1.15883	-0.038823	1.0344	1.06177	1.46431	-2.16784	-0.112968	0.038447	-0.14461	-0.846224	-0.165314	0.782059	1.18655	0.244595	-0.167287	-0.643269	1.68555	0.015946	-2.65728
	TCGA-ZF-AA4V-01	59.33	LIVING	basal	1.724	0.440312	-1.24497	-0.59983	-0.225687	0.464205	-0.457021	-0.637122	-0.748397	-0.923451	-0.941406	-0.204253	-0.40294	-1.53112	-0.991523	-0.584074	-0.840134	-2.16784	0.845368	0.30657	1.08801	0.456807	0.813035	0.817961	0.684569	1.14076	1.33947	0.139892	0.472517	-0.125877	-1.56424
	TCGA-FD-A3B6-01	33.02	DECEASED	basal	0.614626	-1.26479	-3.48845	-0.591703	-0.677561	-0.854884	-1.17866	-0.243091	-0.982797	-1.06515	-2.55859	-0.216155	-0.624407	-2.21334	-0.806433	0.823659	-0.907648	-2.16784	0.922231	-0.407379	1.12178	0.550692	0.51304	0.736829	0.934256	1.38412	1.43605	1.33739	1.40071	-0.186107	-2.65969
	TCGA-K4-A5RJ-01	17.71	LIVING	basal	-4.29578	-2.21682	-2.69035	-1.2283	-0.505936	0.697042	-1.53547	-1.69721	-1.6591	-0.429121	-0.61144	-1.56129	-1.80085	-1.96168	-0.103841	-1.73862	-1.31274	-0.443135	-0.928427	-2.26859	0.69266	-1.08138	0.510647	-0.073531	-0.214653	0.087713	0.530066	0.681931	-0.689234	-0.477162	-1.15508
	TCGA-YC-A9TC-01	0.66	DECEASED	basal	0.331073	-1.32409	0.483736	-0.910349	-3.78073	-2.6057	-0.800715	-1.79739	-1.35147	-2.58812	-0.133902	-0.060157	-0.258196	-0.585676	-0.758515	0.239188	-1.57094	0.238403	-0.362385	-0.010693	-1.71448	-0.635603	-0.289978	-0.708748	-0.292663	0.203955	-1.7081	0.042471	-1.02633	-0.356723	-2.77413
	TCGA-C4-A0EZ-01	8.97	DECEASED	basal	-1.27173	-0.369421	-0.094793	0.976575	-3.85903	-2.45563	-0.964117	-1.55518	-1.33031	-0.897348	0.328862	0.669658	0.609348	0.336357	1.07171	0.494118	1.41714	1.53916	-1.46627	1.34155	-1.48702	0.462782	0.707077	-0.037047	0.502018	0.960817	-0.413338	1.07337	0.003628	0.026363	-2.00118
	TCGA-G2-A2EL-01	26.91	DECEASED	basal	-2.08585	-0.876015	0.363306	0.467094	-3.89184	-1.30388	-1.21582	-2.14552	-0.792523	-0.713206	-0.414849	-0.875613	-1.2446	-1.12636	-0.833196	0.134222	0.131675	1.42086	-1.61808	1.41092	-1.42798	-0.821633	-0.44925	0.030316	0.316068	0.403555	-1.68745	0.408522	-0.254768	0.162435	-2.20441
	TCGA-BT-A20J-01	19.02	DECEASED	basal	-0.320873	-0.826241	0.485198	-0.387182	-2.12785	-0.804037	-0.020822	-0.907337	-0.480444	-0.15382	-0.074115	-0.184966	-0.100221	0.073537	0.123834	0.049981	-0.323349	0.072622	-1.50913	0.081785	0.453499	0.331861	-0.596198	0.234955	-0.077927	0.017152	-0.711469	-0.751442	-0.480231	0.162552	-0.79702
	TCGA-ZF-A9RN-01	20.2	DECEASED	basal	-0.43072	-1.80008	-0.458822	-0.63143	-0.95182	-2.42049	-0.884127	-1.14702	-1.25386	-0.873916	-0.181504	-0.82856	-1.04228	-0.99133	-0.379962	-1.62573	-2.5421	-0.372193	-1.82153	1.81203	-0.48783	0.645569	-0.432534	0.544843	-0.266701	0.479248	-1.20911	-1.25585	-1.46287	0.491796	-1.2507
	TCGA-BL-A3JM-01	6.73	DECEASED	basal	-0.215268	-2.47222	0.050557	-0.197235	-3.05954	-1.58405	-0.838823	-2.18076	-1.31831	1.52259	-0.405982	-1.73342	-1.14326	-1.26263	-0.865354	-0.483638	-0.657714	0.114019	2.64436	-0.584219	-0.371816	0.291286	-2.00236	-0.132306	-0.251265	-0.276139	-1.93626	-1.68699	-0.512344	-2.03365	-2.80063
	TCGA-HQ-A2OF-01	63.96	LIVING	basal	-0.622154	-0.79168	-0.412785	-0.462508	-2.07321	0.196097	0.785111	-0.613398	-0.298716	0.620574	0.879715	-0.751276	-0.935323	-0.295292	-0.882336	-0.424461	-0.985465	0.692522	0.868594	-0.53846	-1.1548	0.567602	-0.752558	-1.03935	-0.840276	-0.692897	-1.69276	0.60188	-0.888606	-0.992816	-2.27577
	TCGA-GC-A4ZW-01	0.49	LIVING	basal	-0.023196	-1.72977	1.08763	-1.05895	-2.70687	0.249554	-0.347051	-0.434873	-1.11623	-0.277275	0.665921	-1.70126	-1.40854	-1.08898	-1.17948	-1.91485	-0.761301	-0.15665	-0.384105	-0.621367	-2.53703	0.33454	-0.843767	-1.07958	-0.359721	-0.128716	-0.029191	-0.810498	-0.179885	-1.16684	-1.42219
	TCGA-BT-A2LA-01	17.15	LIVING	basal	-3.20827	-1.50362	-0.112926	-0.888492	0.41942	-0.953102	-0.796928	-1.80906	-0.646228	-0.49877	1.6662	-1.03811	-0.718066	-0.968418	0.631206	0.837248	-0.917125	0.17476	-0.356502	-2.26859	-2.28191	-1.04628	-1.83699	-2.11618	-1.65053	-0.943161	-2.95846	-1.198	-1.34178	0.123687	-2.6076
	TCGA-K4-A5RH-01	9.07	LIVING	basal	-2.1238	-1.84631	-5.63931	-1.34536	-1.52594	-1.55764	-1.233	-1.87779	-1.65033	-0.43027	-0.252599	0.126116	1.04248	0.216235	0.609622	0.970909	0.313534	0.394253	-0.781517	-2.26859	0.418491	-2.55911	-0.693276	-1.2698	-0.851168	-0.365172	-0.781735	-0.599136	-0.965696	-0.940667	-1.8923
	TCGA-ZF-AA54-01	19.38	DECEASED	basal	-1.6693	-2.24117	-2.40651	-1.41508	-0.453093	-0.924426	-1.16091	-2.25009	-1.2106	-0.981039	-0.499361	0.44207	0.360297	0.581331	0.550839	0.329123	-0.663665	0.686975	0.214341	-0.138032	1.19495	-3.72398	-1.66005	-1.2088	-0.860118	-0.792389	-1.18622	-0.801173	-1.24955	-1.05219	-2.10338
	TCGA-XF-AAN8-01	3.88	DECEASED	basal	-3.04961	-1.3471	-3.06484	-0.86633	-1.92696	-0.188197	-0.745592	-1.7381	-1.37456	-0.519982	0.188495	-0.393105	0.754034	-0.03342	0.178287	1.83758	2.26553	-0.47374	0.058593	0.367899	0.732626	-1.9989	-0.681932	-1.07987	-1.07907	-2.03862	-1.14153	-0.084425	-0.575413	-1.6406	-2.19648
	TCGA-BT-A20O-01	12.16	DECEASED	basal	-3.35593	-2.47753	-0.821348	-1.15446	-1.34524	-1.08418	-1.56467	-1.73084	-3.64642	-2.58812	-0.880054	-0.953414	-0.398123	-0.157374	0.177692	1.57182	-0.156378	-0.242998	-1.33841	-0.336615	0.671396	-2.31028	-1.58667	-1.48118	-0.999548	-0.551349	-0.829297	-0.561039	-1.45397	0.116027	-0.931189
	TCGA-XF-AAN7-01	18.56	DECEASED	basal	-1.58017	-1.9399	0.689897	-2.81348	-2.48025	0.748982	-0.816516	-2.30939	-3.64642	-1.03434	1.66815	0.773869	0.231158	0.222372	0.661571	1.17592	1.13168	0.488709	0.969294	-0.440009	0.156864	-0.607732	-1.77014	-1.65347	-1.37641	-2.03862	-1.46374	-0.427634	-1.89036	-0.795435	-2.04112
	TCGA-FD-A5BS-01	53.84	LIVING	basal	-1.28726	-1.49286	-0.119213	-0.331441	-1.30198	-1.46086	0.010622	-1.18327	-0.79939	0.153398	-0.207423	0.68262	0.872859	0.520609	0.884571	0.444378	1.1518	0.670054	0.535237	-0.232275	0.554641	-0.379834	-0.260146	-0.639768	-0.178598	-0.167691	-0.487229	0.397778	0.190043	-0.638341	-1.78415
	TCGA-XF-A9SI-01	79.6	LIVING	basal	-0.668812	-1.01205	0.040886	-0.385771	-0.9761	-1.20534	-0.037941	-1.07405	-0.941308	-0.642728	-0.013981	1.01883	1.37403	1.31873	0.433321	0.891852	1.35483	0.834336	0.149969	-0.800976	-0.182795	0.430978	-0.366546	-0.688478	-1.22789	-0.191812	-1.6162	-0.552088	-0.310146	0.553727	-1.49849
	TCGA-DK-A3WY-01	163.17	LIVING	basal	-1.09025	-1.72723	-1.57801	-2.81348	-1.40914	-0.936818	-0.190081	-1.68542	-1.54446	-1.04779	0.318599	1.43481	1.40187	1.29248	1.34625	1.0399	1.3616	1.11155	-0.419036	-2.26859	0.526858	0.040651	-0.359211	-0.991255	-0.638341	-0.136571	-1.04126	-0.642837	-0.902042	-0.309146	-0.556369
	TCGA-FD-A5BX-01	5.68	DECEASED	basal	-1.453	-0.666552	-0.464562	-2.81348	-0.609652	0.481662	-0.379303	-1.19542	-0.492528	0.443123	0.726051	1.29149	1.33268	1.06519	1.2873	0.986192	0.546104	1.11128	0.511903	-2.26859	0.580241	-2.18486	-1.97536	-0.462653	-1.19668	-0.726385	-1.15817	-0.271658	-1.06968	-0.589373	-1.84021
	TCGA-FJ-A871-01	8.94	DECEASED	basal	-0.975725	-0.428837	-1.11337	-0.65842	-1.7221	-1.59242	0.244457	-0.43467	0.310031	0.419331	0.139099	0.605008	0.683967	0.192316	0.974813	1.51929	0.316871	0.648093	3.14889	-0.51161	0.444512	-1.85794	-1.98892	-0.592013	-0.989322	-2.03862	-0.776714	-1.73194	-0.261421	-0.544422	-1.65806
	TCGA-G2-AA3C-01	6.93	DECEASED	basal	0.09065	-4.28506	-2.58529	-2.81348	-2.76848	-0.275193	-1.15643	-1.7391	-1.3897	-1.09593	-2.55859	-0.720115	-0.624323	-1.56422	-0.23305	1.55202	-1.34923	-0.386804	-1.5422	0.149868	1.27615	-2.8024	-0.175731	-0.492443	-0.399835	0.139429	-0.115324	-0.335737	-0.49541	-0.645083	-2.69786
	TCGA-GD-A3OS-01	20.96	LIVING	basal	-1.95566	-0.555796	-1.46182	-2.81348	-1.45643	-1.63144	-0.139239	-1.62393	-0.415751	-0.254555	1.50756	0.056687	0.35205	-1.00806	0.270943	1.65922	1.65941	0.042775	2.11615	0.164843	-0.343684	-0.087646	-0.144674	-0.047605	0.479621	0.416151	-0.5061	0.783381	0.56079	0.168707	-1.36431
	TCGA-ZF-AA5N-01	5.52	DECEASED	basal	1.22126	1.39541	-0.540176	-2.81348	0.436451	0.369688	0.208338	0.349428	0.197519	0.672958	0.44045	-1.19279	-1.08593	-1.58864	-0.63483	-1.50483	-0.602406	-2.16784	-0.606057	0.278078	1.087	-0.264345	1.64959	1.4093	0.897689	0.00695	0.575946	-0.531772	-0.456392	0.842842	-0.426815
	TCGA-ZF-AA4R-01	34.03	DECEASED	basal	-0.371144	0.813992	0.285011	-0.862703	0.182086	-0.408766	0.217882	0.330356	0.7267	-1.1646	-2.55859	0.632837	0.588693	-0.36392	-0.188114	0.307212	0.633114	-2.16784	0.50949	1.15093	-0.075749	0.285095	0.080732	0.568008	0.618802	0.729133	-0.186892	-0.019469	0.017807	0.777773	0.203402
	TCGA-E7-A3X6-01	29.7	DECEASED	basal	-0.205549	0.610021	0.560041	-0.39568	0.07312	0.238575	-0.769374	-0.117373	-0.382586	-0.001635	-0.27588	-0.008012	-0.138582	-0.114736	-0.252122	-0.324857	0.076288	-2.16784	-0.284518	0.79279	0.597801	1.24106	1.40895	0.883539	1.07146	0.852778	1.53183	0.23702	0.87915	-1.27277	0.627266
	TCGA-YC-A89H-01	18.82	LIVING	basal	0.790611	1.21161	0.368755	0.97004	0.516561	0.712988	0.742606	1.00296	1.00281	-0.166254	-2.55859	-0.247982	-0.38512	-1.1979	-0.943551	-0.340616	-0.225526	-2.16784	-0.812151	0.185258	0.435633	0.21461	1.58684	-0.06374	1.12545	1.18626	-0.305019	1.0274	0.978283	-1.27158	0.513244
	TCGA-E5-A2PC-01	43.56	LIVING	basal	0.039573	0.796154	0.71422	-1.19279	0.124829	0.119187	-1.49388	-0.764105	-1.41406	-1.12047	-2.55859	-0.373472	-0.451209	-0.762248	0.47485	-0.848291	-1.21517	0.126229	-2.75667	-0.520444	0.947387	0.003188	-0.358757	1.03632	1.20626	0.364465	0.751251	-0.020014	-0.164514	-1.03274	0.743079
	TCGA-DK-A2I6-01	87.25	LIVING	basal	-0.134452	0.65684	-0.39774	0.295291	-0.034723	0.560623	-1.02031	-0.236857	-1.56487	-1.01464	-2.55859	-0.287364	-0.379806	-0.615324	-0.079163	-0.570026	-1.29499	0.051006	-1.495	-0.342456	0.605087	0.806969	-0.550732	-1.11561	0.967147	-0.234235	1.16135	-0.506007	-1.71272	0.620932	0.440904
	TCGA-DK-A1AE-01	16.13	LIVING	basal	-0.705485	0.50121	0.537404	-1.03865	-0.663971	-0.731273	-1.42911	-1.5859	-1.87093	-0.763986	-0.347971	0.021966	0.257415	0.622383	0.558932	-0.038049	0.003126	0.618983	-1.25171	-0.267248	0.368263	-0.639926	-0.143244	1.20934	0.330194	-0.119234	0.190323	-1.02906	-0.79116	1.41225	1.02731
	TCGA-DK-AA6M-01	51.97	LIVING	basal	0.920623	-0.569098	-0.345055	-0.649909	-0.598665	-1.00852	-0.841714	-0.699988	-1.00253	0.205447	0.776291	-0.271056	-0.289735	-0.5622	-0.562018	-0.058379	0.679027	-0.386046	1.38076	0.501382	0.708284	1.16035	0.500636	1.10184	1.22239	0.776154	0.722815	2.09213	1.24965	-1.16638	0.113598
	TCGA-GV-A40E-01	8.57	DECEASED	basal	0.941487	0.532938	-0.959287	0.177122	0.043989	-0.484003	-0.904579	-0.16991	-1.19448	-1.06398	0.569647	-0.511051	-0.853641	-1.29482	-0.337663	0.496679	0.752526	-0.530525	0.416728	-0.215491	0.978735	1.11576	1.08361	0.721547	0.725574	0.61509	0.640098	0.614928	1.44361	0.503885	-0.185473
	TCGA-HQ-A5NE-01	12.16	DECEASED	basal	-0.740539	0.383162	0.104833	0.287605	-0.186492	0.14256	0.477988	-0.385769	0.342273	1.00552	0.741573	0.325037	0.443226	0.057736	0.105698	0.318169	0.3954	0.078005	-0.620442	0.453223	0.793533	1.61488	1.56013	0.539986	0.467974	0.409511	1.39107	0.287009	0.703687	1.09193	0.589441
	TCGA-ZF-AA56-01	8.51	DECEASED	basal	-0.571299	0.520353	0.413804	0.210247	-0.323621	-0.004184	0.486041	0.046859	0.586239	0.949729	1.06399	0.312419	0.065203	0.085099	-0.599645	-0.072119	0.277048	-0.49958	0.123153	0.850712	0.867343	0.765551	0.959961	1.31339	1.24037	0.911122	0.832674	1.14409	1.17617	1.18001	0.711772
	TCGA-UY-A78P-01	78.19	LIVING	basal	0.368919	0.664019	0.571538	-0.268381	-0.828426	-0.376417	-0.424329	-1.1036	-0.382466	1.06391	0.720083	0.433281	0.276296	-0.315841	0.209017	0.534063	0.45931	-0.154743	-0.652032	0.319716	0.758847	1.25991	1.50081	1.25924	1.28791	1.00616	0.949152	1.13569	-0.055515	0.958454	0.342328
	TCGA-K4-A6FZ-01	1.81	LIVING	basal	0.180489	0.427693	0.439946	-0.580428	-0.445818	0.783719	0.473207	0.037067	0.839533	1.26266	0.691206	-0.878735	-0.758063	-0.563625	-0.420726	-1.26398	-0.934413	0.029441	-0.209352	1.8299	0.67496	0.940527	1.52347	1.14581	1.30278	1.57902	1.34961	1.26278	1.9281	0.951064	0.320741
	TCGA-XF-AAMW-01	8.31	DECEASED	basal	-1.12434	-0.276423	-0.320009	-2.81348	-0.934724	-0.802084	-0.926311	-1.326	-0.845634	0.485801	0.544445	-1.04491	-0.997847	-0.903701	-0.529194	-0.939983	-0.724458	-0.133799	0.97267	-0.214397	1.85064	1.92291	1.14087	1.07882	1.47646	1.58168	1.03607	0.568012	0.098486	1.13439	0.539524
	TCGA-GD-A3OQ-01	3.12	LIVING	basal	-0.338452	0.723179	0.403604	-0.712128	0.04251	0.286631	0.24232	0.314089	0.260856	0.664428	0.634023	-0.381424	-0.443606	-0.448724	-0.469772	-0.648142	-0.276198	-0.100984	0.115067	0.303314	1.23985	1.20581	0.604166	0.887471	1.00802	1.03308	1.36995	0.053845	0.176651	0.624881	0.172125
	TCGA-XF-A9T4-01	16.26	DECEASED	basal	-0.731179	0.345336	0.251658	-0.84536	-0.077364	0.173384	-0.460892	-0.120646	-0.275112	0.482595	0.21317	-0.838426	-1.19142	-1.15957	-0.902543	-0.838393	-1.03168	-2.16784	-0.114699	0.399384	1.52073	1.84686	0.95196	1.12211	1.32227	1.32698	1.22493	0.942752	-0.256425	1.10347	0.185349
	TCGA-4Z-AA7W-01	27.6	LIVING	basal	-0.030311	0.269737	-0.40317	-0.491587	-0.378662	-0.277069	-0.779658	-0.574209	-0.83693	-0.680724	-0.527279	0.346449	0.368407	-0.164622	0.787356	0.01601	-0.213455	0.646843	-1.2872	-0.110536	0.478183	0.871685	0.77862	1.29741	1.38194	0.615671	1.40531	-0.440336	0.207015	0.561918	-0.326391
	TCGA-E7-A97P-01	14.36	DECEASED	basal	0.450633	0.566351	0.444653	-0.336821	-0.418469	-0.852857	-1.11907	-1.45919	-0.884052	-0.22283	-0.896392	1.00954	0.952677	0.491552	0.862976	0.699245	0.634526	0.633441	-0.440489	-2.26859	0.977887	1.44617	1.07338	1.21296	1.46073	1.48741	1.94321	0.996827	1.04382	1.09462	0.477764
	TCGA-HQ-A5ND-01	9	DECEASED	basal	-0.816665	0.556287	0.429144	-0.493776	-0.259227	0.057724	-0.477114	-0.634832	-1.28004	1.0515	0.174522	0.54598	0.4189	0.49371	0.825578	0.340489	-0.570626	0.596036	-1.10557	-0.807568	0.599561	1.0147	1.54379	1.18009	1.1482	0.672979	0.980089	-0.141851	0.219154	0.973258	0.89348
	TCGA-DK-AA74-01	56.11	LIVING	basal	0.58936	-0.5662	-0.368848	-0.379665	-0.271157	-0.897588	-0.134329	-1.09144	-0.711224	0.010765	-2.55859	1.10951	1.06919	0.465327	0.710346	0.696441	0.781984	0.655883	0.509536	0.7814	0.653995	1.39264	1.53467	0.916873	1.13634	1.05694	0.893133	1.77568	0.855783	0.346815	-0.193156
	TCGA-YF-AA3M-01	13.63	LIVING	basal	0.710903	0.565531	0.051452	0.680333	0.271123	0.470616	-0.823217	0.287145	-0.811806	-0.112098	-2.55859	0.409777	0.376672	0.189699	0.752886	0.324144	-0.150382	0.630897	-0.512692	0.4623	-0.041506	0.237558	0.565462	0.972194	0.726163	-0.033254	1.32043	0.432043	1.11097	0.740706	0.219346
	TCGA-BT-A20U-01	14.95	DECEASED	basal	-0.110408	0.43384	0.617845	-0.921162	-0.362874	-0.737346	-1.4894	-0.158676	-1.14171	0.525506	-2.55859	0.004329	0.023348	-0.036758	0.041287	0.486842	-0.112263	-0.062483	-0.325837	1.94984	-0.019264	0.32323	0.667424	1.18229	1.05268	1.00866	0.671284	1.21174	0.588783	0.852324	1.11178
	TCGA-GU-AATQ-01	7	DECEASED	basal	-0.357412	-1.18987	0.526645	-0.742766	-0.574629	-0.445906	-0.884619	-1.08166	-1.31421	-0.815118	-2.55859	0.895741	0.764278	0.776925	0.913433	0.675762	-0.248966	0.963709	-0.910174	-0.124009	0.665729	0.342186	1.00848	1.3593	1.13548	0.693165	-1.12186	0.353005	0.055202	0.907094	0.948455
	TCGA-XF-A9T5-01	66.59	LIVING	basal	-0.362027	-1.42429	-0.077031	-0.339366	-0.780658	-1.57085	-0.63502	-1.2215	-0.528614	0.011996	0.584461	-0.038067	-0.114398	-0.416097	-0.106736	-0.162773	0.042954	0.706187	-0.910182	0.369003	0.031996	1.11115	1.33803	1.18939	1.06469	0.10652	-0.523506	-0.197794	0.972736	0.441661	0.30145
	TCGA-GU-A762-01	7.62	DECEASED	basal	0.025665	-2.13243	-2.38643	-2.81348	-0.82502	-1.1468	-3.35516	-1.32513	-1.58399	-0.527014	-0.524413	-0.668921	-0.259831	-0.738276	-0.181183	-0.559396	-0.802953	-0.64987	0.758473	-0.489796	1.22798	1.61752	1.65421	1.2664	1.08453	1.06354	0.89953	-0.143702	-0.421306	0.629539	0.578942
	TCGA-UY-A8OC-01	3.02	DECEASED	basal	0.237448	-0.33763	-0.190986	-2.81348	-0.616864	-0.625316	-3.35516	-1.64607	-0.545749	0.023184	-0.356341	0.693687	0.856615	0.399163	0.452657	0.46086	0.133417	0.508129	0.259948	-0.241623	1.67562	1.63319	0.554051	1.07849	0.920682	1.2695	0.760662	0.618779	-0.51542	0.766185	0.612624
	TCGA-LC-A66R-01	15.31	LIVING	basal	0.245592	0.419647	-1.07283	-0.161209	0.012124	-0.504451	-0.500428	-1.32532	-3.64642	-0.88335	-0.758966	0.735434	0.027784	0.185194	0.368321	-0.395342	0.156376	0.250903	-0.106644	0.618579	0.65737	1.35607	1.33031	0.896087	1.00994	1.05885	1.32224	0.825644	2.01553	0.969542	0.490624
	TCGA-BT-A3PJ-01	25.92	LIVING	basal	-1.03767	-0.920459	-1.62719	-0.646364	-2.21022	-3.23866	-1.68684	-1.23713	-1.40926	-1.11564	-1.02419	-0.509484	-1.31196	-1.49618	-0.504282	-1.20778	-1.59631	-2.16784	0.707302	0.009733	1.21608	1.43262	1.59766	1.08816	1.05007	0.757397	0.55073	1.66225	0.819927	-1.43696	0.903651
	TCGA-XF-A9SY-01	21.02	LIVING	basal	0.095778	-1.22342	-1.5976	-0.77832	-1.95257	-2.5682	-1.00845	-1.45176	-1.01802	-0.533186	-2.55859	0.141133	0.19268	-0.566051	-0.132194	0.190029	-0.324972	-2.16784	-0.557457	-0.736099	2.07982	1.19075	0.072695	0.852005	1.30035	0.829213	1.19727	0.382232	0.165353	0.655761	0.800422
	TCGA-BT-A0YX-01	13.14	DECEASED	basal	-1.41575	-1.77157	0.31558	-1.01233	-1.38574	-0.9718	-3.35516	-0.76497	-1.66789	-0.643261	0.061086	-0.250099	-0.394391	-0.558998	-0.793934	-0.888189	-0.462238	-2.16784	-1.41494	0.050892	1.14884	0.43349	0.187635	1.73168	1.66981	1.22034	1.11867	0.403245	1.68508	1.11336	1.07503
	TCGA-BT-A42F-01	28.38	LIVING	basal	-2.25753	-1.6548	-0.11889	-2.81348	-0.858896	-0.370097	-0.755786	-0.731415	-1.08064	-0.636131	-0.899522	-0.733005	-0.437769	-1.65012	-0.62506	-0.830698	-0.618692	-0.652798	-1.40075	0.292395	0.976643	0.195522	0.062703	0.39382	1.4161	1.11799	1.22933	1.0972	1.73497	0.654722	0.191046
	TCGA-ZF-AA4N-01	2.89	DECEASED	basal	-2.33106	0.620525	-0.837249	-2.81348	-2.44162	-1.85335	-3.35516	-1.91049	-1.84862	-0.826431	-0.83079	-0.645432	-0.530658	-0.333067	0.142407	-0.430898	-1.14379	0.094	-1.74951	1.19819	1.14385	0.019925	1.59788	1.34201	1.23358	0.706553	0.783476	1.19148	-0.343662	1.08995	0.73579
	TCGA-FD-A3B7-01	4.01	DECEASED	basal	-0.320371	-1.46656	-0.395483	-1.05552	-1.36213	-0.568585	-1.13517	-1.56618	-1.57045	-1.07401	-0.60607	1.19665	0.398323	-0.33836	0.510687	0.335899	0.058848	-2.16784	-1.57026	0.048671	1.21085	1.83317	1.48893	1.19658	1.39523	1.49262	0.65906	1.17333	-0.517217	0.732584	0.513768
	TCGA-DK-AA6R-01	165.6	LIVING	basal	-2.1779	-1.3935	-0.845743	-1.42917	-1.15016	-0.556118	-0.840759	-0.612519	-0.181723	-2.58812	-2.55859	0.36007	0.314813	0.098302	0.419652	0.15855	-0.427886	0.352655	0.842259	0.714458	2.05992	1.01292	1.95455	1.40016	1.60746	1.44588	1.50282	1.9319	3.3151	1.35266	1.18076
	TCGA-FD-A62N-01	2.69	LIVING	basal	0.680266	-1.58875	-1.69737	-2.81348	-1.04041	-1.97248	-1.08546	-1.62194	-1.87108	-0.273203	-0.250657	0.726474	0.820351	0.477753	0.652049	0.400866	0.817449	0.291652	0.479129	-0.760048	1.02032	0.628106	1.82519	1.19774	0.975382	0.965391	0.653852	1.1928	0.736078	0.451059	0.374224
	TCGA-XF-A9SM-01	34.43	LIVING	basal	0.250066	-1.80496	-0.841957	-0.955078	-1.12724	-1.11745	-0.979349	-1.01869	-1.57917	-1.20205	-0.889952	0.129491	-0.035237	-0.370518	0.190082	-0.097554	0.088827	-0.134618	-0.585981	0.563038	0.804478	1.42954	0.945858	1.05426	1.1029	1.00285	0.400506	0.988936	0.593973	0.196781	0.132294
	TCGA-FD-A5C1-01	58.87	LIVING	basal	1.20743	-0.931401	-0.674735	-1.24223	-0.030009	-1.00548	-0.742696	-1.33391	-1.35489	-1.18015	-0.86483	0.324646	0.34839	-0.47454	-0.016995	-0.237604	-0.144979	0.109142	-0.273015	1.23243	0.847076	1.29771	1.06596	0.990074	1.13587	1.27695	1.11871	1.27746	0.820965	0.565907	0.175036
	TCGA-GU-A766-01	15.77	LIVING	basal	0.688992	-1.23004	-1.82485	0.029067	-1.56906	-2.21566	-0.627205	-1.4667	-0.995271	-0.914343	-0.227897	0.939532	1.17048	1.24259	1.03276	1.04807	-0.144259	0.884568	-0.610776	0.940821	0.969538	1.31254	1.21649	0.98876	1.09888	1.25289	2.08269	1.94941	0.931237	0.591917	0.464348
	TCGA-4Z-AA86-01	10.22	DECEASED	basal	-0.667069	-0.33353	-2.09153	-0.375288	-0.733841	-0.772671	-0.507298	-0.675431	-0.704071	-0.995069	-0.555321	0.411545	0.53769	0.406823	0.635786	0.516493	0.38847	0.301714	0.841134	0.739909	0.81346	1.25513	1.54045	1.12539	1.19169	1.01543	1.67371	1.30104	1.13555	0.822668	0.514582
	TCGA-4Z-AA82-01	51.12	DECEASED	basal	-0.657781	-1.36858	-2.3759	-0.522376	-0.311128	-1.28066	-0.779476	-1.34618	-0.946262	-0.492	-0.887778	0.831498	0.785442	0.741373	1.08408	0.787544	0.509701	0.782875	-0.249475	0.332082	1.9827	1.02838	1.21777	1.36471	1.18653	1.1987	1.42779	0.39748	0.621574	0.914675	0.775652
	TCGA-DK-A1AB-01	16.69	DECEASED	basal	-1.68238	-0.327344	-0.093255	-0.938397	0.063759	-1.56198	-1.39386	-1.11645	-1.12152	-0.504356	-0.81493	1.36024	1.15341	1.46753	1.01958	1.19512	1.18676	1.04008	0.56066	1.46858	0.825334	1.17077	0.306913	1.46407	1.16622	0.956679	0.936813	0.935883	2.40631	1.02504	0.942088
	TCGA-FD-A5BU-01	19.32	LIVING	basal	-2.71594	-1.03013	-0.834154	-2.81348	-0.847353	-2.82985	-0.948823	-1.67409	-0.928381	-0.966483	-0.247837	1.68361	1.61062	1.42484	1.26744	1.59271	0.918864	1.16223	-0.447984	1.38081	1.47607	1.96928	1.99913	1.62856	1.64188	1.81881	1.60932	1.46791	0.155825	1.3781	1.12208
	TCGA-FD-A62S-01	13.34	DECEASED	basal	-1.28982	-0.603476	-0.504771	-1.21711	-1.31202	-1.76865	-0.599245	-0.813596	-1.06354	-0.589558	-0.074018	0.776674	0.816657	0.896078	0.660048	0.862589	0.759861	0.462984	0.656687	0.974901	0.721583	1.30909	1.05381	0.950974	0.946022	0.585145	1.22937	1.09455	0.533374	0.870504	0.530495
	TCGA-FD-A3B3-01	32	DECEASED	basal	-1.28115	-1.27692	-1.50914	-0.642325	-1.42501	-2.2149	-0.74461	-1.64195	-0.92471	-0.950726	-0.056552	1.06833	1.04867	0.937511	0.770017	0.920908	0.765566	0.66808	-0.937111	1.9083	0.972379	1.58593	1.7762	1.27667	1.40203	1.75137	1.38042	1.51533	2.42711	1.27597	0.874194
	TCGA-FD-A3B4-01	16.75	DECEASED	basal	-2.06235	-2.40852	-2.64067	-2.81348	-2.17973	-2.9271	-1.1469	-1.51765	-2.03181	-0.536214	-0.150402	1.20736	1.20253	1.20004	1.31896	1.09549	0.703997	1.03766	0.170453	1.28189	1.12636	1.4148	2.18096	1.52296	1.56639	1.61924	1.61501	1.60226	2.4393	1.06946	1.28486
	TCGA-XF-AAMT-01	2.96	DECEASED	basal	-0.148745	-0.114145	-0.068825	-1.00267	-0.51099	-1.04321	-0.366715	-0.947192	-0.751191	-0.785013	-0.411959	0.824248	0.916983	0.915271	0.731832	0.745151	0.827425	0.662227	-0.003813	0.633594	0.941129	1.25047	1.69838	1.32272	1.42573	0.93238	0.487008	0.834364	1.80389	0.749548	0.823367
	TCGA-GU-A42Q-01	11.3	DECEASED	basal	-1.42345	-1.7463	-0.315017	-1.48421	-0.882568	-2.11646	-3.35516	-2.04265	-1.29371	-0.694863	-0.422694	0.398038	0.336028	0.341772	0.710504	0.568057	-0.620375	0.445292	-0.985729	0.789235	0.818585	1.06233	1.86707	1.45001	1.53502	1.48872	0.058196	1.36014	1.78463	1.16388	1.37242
	TCGA-XF-A8HE-01	125.39	LIVING	basal	-1.23396	-1.47496	0.353104	-1.27296	-1.02447	-1.12914	-3.35516	-1.62425	-1.71263	-2.58812	-0.438899	0.082065	-0.142936	-0.582429	-0.12011	0.662611	-0.35331	-0.317792	-1.15237	0.848057	0.746023	0.723944	1.55987	1.46283	1.54846	1.72226	0.498224	1.49385	1.77353	1.13231	0.507425
	TCGA-DK-A2I2-01	7.79	DECEASED	basal	0.141501	-0.607849	-1.47348	-0.938214	-1.47577	-1.93667	-1.03588	-1.1224	-0.320991	-1.017	-0.132711	0.238192	0.252304	-0.144995	0.273787	0.16975	0.099402	-0.183298	-1.01739	1.52214	2.69255	1.31566	1.78037	1.32892	1.45197	1.79856	0.559873	2.4057	1.6116	0.732153	0.282879
	TCGA-ZF-A9RD-01	13.4	DECEASED	basal	-1.05384	-1.81655	-0.633036	-0.832246	-1.22666	-2.22741	-0.829555	-1.37	-0.265851	0.213318	0.226349	0.329446	0.230489	0.063217	0.832033	0.079259	0.320993	0.404011	-0.190281	1.63178	2.20456	1.25334	1.99643	1.45291	1.47097	1.58953	1.49886	2.18114	2.52851	1.03667	0.635769
	TCGA-BT-A20X-01	8.25	DECEASED	basal	-0.981454	-0.718448	-1.11185	-0.908991	-1.96637	-1.06005	-1.13665	-1.25514	-0.851966	-0.631175	-0.167734	-0.211396	-0.349423	-0.426759	-0.267009	-0.003123	0.258118	-0.440502	-0.810254	0.777137	1.34289	1.0811	2.00685	1.64424	1.76882	1.92133	1.21651	2.2858	0.731922	1.44374	0.448491
	TCGA-GC-A3YS-01	24.9	LIVING	basal	-0.650328	-0.868	-0.09223	-0.543395	-0.606477	-1.26727	-0.842245	-1.20667	-0.901763	-0.545735	-0.000422	0.380512	0.50717	-0.060963	-0.157189	0.024277	0.47654	0.031204	0.185569	0.382803	0.69139	0.965402	1.1888	0.93565	0.700802	0.829957	1.00124	1.178	0.681015	1.24172	0.592192
	TCGA-DK-A3WX-01	10.55	DECEASED	basal	-0.436333	-0.924688	-0.722935	-0.803331	-1.81528	-2.61068	-3.35516	-0.604966	-0.651522	-1.26201	-0.490646	0.157626	0.03169	-0.583501	0.114683	1.41747	0.157286	-0.525766	-0.81267	1.18718	1.28742	1.5085	1.7655	1.0462	1.48329	1.66191	2.05848	1.84048	2.00743	0.962451	0.481548
	TCGA-K4-A4AC-01	9.13	DECEASED	basal	-1.96979	-1.72056	-0.484681	-0.413956	-1.31608	-1.04876	-0.800891	-0.976656	-1.01496	-1.16118	-0.843063	0.912326	0.798176	0.562315	1.16566	0.74524	-0.477568	0.882749	-2.43342	2.03409	1.20598	1.24576	2.20119	1.50414	1.58726	1.74879	1.84887	1.54406	1.28277	1.15137	1.0639
	TCGA-XF-A9T8-01	13.73	DECEASED	basal	-1.61733	-1.68725	0.210914	-1.1731	-1.40403	-1.5267	-1.1908	-1.34445	-1.59294	-1.01191	-0.905824	0.496255	0.419115	0.274298	0.790788	0.410039	-0.144967	0.547195	-1.67491	-0.22829	1.60197	0.865586	1.01229	1.40066	1.39804	1.6562	1.17403	1.64747	0.972514	1.12114	0.639586
	TCGA-C4-A0F0-01	1.94	LIVING	basal	-0.413598	-1.29527	-5.63931	-2.81348	-2.82299	-2.4972	-1.04804	-4.52857	-1.56538	-0.539351	-0.737257	0.528879	0.587028	0.197919	0.627583	0.617273	-0.939097	0.524074	-0.951412	0.486395	1.30016	0.959684	2.00203	1.46785	1.41008	1.18007	1.45079	0.818048	1.32883	1.22166	0.873454
	TCGA-PQ-A6FI-01	12.22	LIVING	basal	-0.403559	-1.90616	-2.25624	-0.740111	-1.89125	-1.23763	-1.66089	-4.52857	-1.34824	-0.764489	-0.623082	0.352458	0.305238	-0.053644	0.567846	0.313119	-1.10364	0.408498	-1.61086	1.37162	1.50495	1.10879	2.1601	1.54056	1.67041	1.86415	1.81554	1.76822	2.07263	1.26702	0.840072
	TCGA-ZF-AA53-01	57.85	LIVING	basal	-0.633036	0.168912	-1.48018	-0.946671	-0.153307	-0.171687	-3.35516	-1.9196	-1.58925	0.540319	-0.158311	1.2058	0.998308	0.313482	0.963308	0.325032	0.581661	0.717145	0.214645	1.09652	1.22377	1.37675	1.69889	1.18842	1.49255	1.75987	1.80239	0.956599	1.99113	1.11681	0.815401
	TCGA-FD-A3N5-01	22.5	DECEASED	basal	-1.3779	-0.46741	-2.96246	0.284542	-0.214702	-2.51045	-0.913366	-1.52066	0.348587	-2.58812	-0.502366	0.899741	0.816342	0.480641	0.979876	1.24654	-0.515967	0.583288	0.411783	2.89018	1.14452	1.30621	2.02977	1.49177	1.55792	1.72513	1.65641	1.65474	2.88751	-0.610413	0.873565
	TCGA-GC-A3I6-01	20.7	DECEASED	basal	-1.28842	0.231761	0.430897	-0.256055	-0.106476	-0.532518	-0.638821	-0.628238	-0.545792	0.347761	-0.073148	0.127443	0.01767	-0.230767	0.031399	-0.061534	0.124916	0.047402	-0.428644	1.18404	0.633603	1.06522	1.42042	1.24056	1.19538	0.852909	1.30007	0.711122	1.42192	1.19165	0.719934
	TCGA-FD-A5BY-01	8.25	LIVING	basal	-0.981649	0.697928	0.171404	-0.863259	-0.468127	-0.542421	-0.350559	-0.427613	-0.223435	-1.04591	-0.710906	0.594534	0.729392	0.399483	0.805275	0.279718	0.207714	0.518817	-0.638042	0.464357	0.511899	1.26686	0.533607	1.08611	1.1826	0.800812	1.07921	0.781151	1.19163	1.10444	0.642988
	TCGA-PQ-A6FN-01	16.66	LIVING	basal	-0.892623	0.622329	-0.108425	0.228766	-1.48022	-0.221355	0.167169	-0.369231	0.246891	0.150745	-0.158199	0.920743	0.881766	0.232496	0.979576	0.858208	-0.157191	0.820953	-0.958494	1.26105	1.11664	1.19892	1.88634	1.10154	1.18783	1.3236	1.7466	2.11463	2.02199	1.09457	0.223203
	TCGA-E7-A7XN-01	14.06	LIVING	basal	-0.279203	-0.987244	0.571925	-0.984014	-1.40372	-0.75515	-1.36514	-1.16291	-0.834654	-2.58812	-2.55859	-0.665504	-0.417291	-0.379699	0.34872	-0.362627	-1.21505	0.222732	-2.02787	1.05068	0.73084	1.70226	1.87074	1.55031	1.56128	1.38693	2.00316	0.530458	2.07624	1.11334	0.955504
	TCGA-G2-A2EF-01	61.89	LIVING	basal	-1.03326	-1.19493	-1.3582	-1.42564	-2.31106	-2.43104	-1.76654	-1.60267	-1.17	-0.669166	-2.55859	-1.79741	-1.21317	-1.26714	-0.391965	-1.46365	-2.57292	-2.16784	-2.02698	0.756856	0.977186	0.468484	1.14053	0.734494	0.595677	0.730377	0.240288	0.745423	0.635616	0.890913	0.783172
	TCGA-CF-A1HS-01	12.55	LIVING	basal	-0.878741	-0.068581	-0.482856	0.028989	-0.906489	-0.969023	-0.447691	-0.181744	0.482067	0.657796	-0.215389	-1.432	-1.37583	-0.841411	-0.555739	-0.610334	-1.24178	-2.16784	-1.03097	2.3096	0.896878	1.69049	1.99167	1.61332	1.7098	1.8268	1.43279	1.43314	2.36343	1.21013	0.89965
	TCGA-FD-A43Y-01	15.57	DECEASED	basal	-1.19233	-0.741225	-0.355245	-0.597187	-0.562344	-0.878926	-0.796291	-1.14791	-0.554533	-0.352805	-0.810638	-0.176527	-0.405076	-0.948863	-0.270782	-0.645045	-0.532344	-0.417688	-0.249825	1.14084	1.53235	1.82799	1.73709	1.45511	1.59434	1.2897	1.34322	1.83462	2.01573	1.27467	1.14002
	TCGA-FD-A3N6-01	27.96	LIVING	basal	-1.19843	-1.61824	-2.44641	-1.51359	-2.85421	-2.86089	-3.35516	-2.02251	-0.717689	-1.10054	-2.55859	-0.763812	-0.900415	-1.31666	-0.720898	0.09762	-0.89092	-2.16784	0.027978	2.48874	1.29122	0.972537	2.10367	1.66534	1.77795	1.98066	2.18936	1.41977	3.19314	1.5284	1.24605
	TCGA-DK-A3WW-01	20.8	LIVING	basal	0.017147	0.155973	-0.38449	-0.736455	-0.592947	-2.40439	-3.35516	-1.46388	-1.32896	-0.724573	-0.515733	-1.41349	-0.793727	-1.48828	-0.943065	-0.455887	-2.67663	-2.16784	-1.85446	0.844801	0.906812	2.12717	2.03056	1.47447	1.50621	1.73578	1.43092	0.939254	2.68786	1.32084	0.763795
	TCGA-G2-A3IB-01	7.23	DECEASED	basal	-0.707819	-1.29039	0.19228	-0.709606	-0.81045	-2.27465	-1.63737	-1.33546	-0.667854	-0.039071	-0.965877	-0.651847	-0.71111	-1.35245	-0.4762	-0.556448	-1.99261	-0.30571	-1.3277	2.44731	1.2041	1.44162	2.02802	1.58769	1.68007	1.89528	1.59668	1.11317	2.35839	1.35948	1.13489
	TCGA-G2-A2EJ-01	47.96	LIVING	basal	-0.635458	-0.310587	-0.407625	-1.51371	-1.95071	-3.28385	-1.16104	-0.974204	-1.09879	-0.896233	-0.463833	-1.48371	-1.50376	-1.53199	-0.842577	-0.42514	-2.66998	-2.16784	-1.58353	0.846412	1.22897	1.71575	1.75311	1.25086	1.59867	1.90582	1.57237	2.54002	3.02081	1.27536	1.17791
	TCGA-GC-A3RC-01	15.9	LIVING	basal	-2.35268	-0.825495	-2.92251	-1.11277	-1.8525	-2.68288	-1.28441	-1.31376	-1.45544	-1.02374	-2.55859	-2.42435	-1.70609	-1.46614	-0.85053	-0.203621	-2.47515	-2.16784	-0.588143	2.05766	1.85014	1.45152	2.0939	1.5813	1.65286	1.72866	1.21921	1.29513	2.08331	1.55413	1.02832
	TCGA-DK-A3IM-01	8.15	DECEASED	basal	-1.61034	-0.529802	-1.98942	-0.931513	-1.11974	-1.45715	-1.36096	-1.55623	-1.01018	-1.30619	-0.032067	-1.11729	-1.15941	-1.30013	-0.601495	-0.273328	-2.31693	-0.733039	-1.24285	1.76374	1.13962	1.17217	1.92714	1.45744	1.64896	1.85132	1.79137	1.35957	2.36978	1.45109	0.881552
	TCGA-BT-A42E-01	36.4	LIVING	basal	-0.748542	-0.412392	-2.05907	-1.19827	-1.6248	-2.84301	-1.15657	-0.99627	-1.37559	-0.59786	-0.70684	-0.777429	-0.638662	-1.05903	-0.990799	-1.0319	-2.51635	-0.682753	-1.40946	1.95691	1.1952	1.6542	1.6128	1.38138	1.51202	1.46611	1.51866	1.56552	1.89043	1.3829	0.889284
	TCGA-ZF-AA4W-01	60.12	LIVING	basal	-0.816841	-0.088586	-0.886807	-0.332959	-1.91657	-1.38963	-0.49533	-1.21971	-0.741265	0.136424	-0.425038	-0.671167	-0.919295	-1.14658	-0.380023	0.010148	-1.36479	-2.16784	-1.72972	0.715527	1.30112	2.31173	2.19774	1.56059	1.7221	2.02842	1.33075	1.10877	1.61874	1.38527	0.664132
	TCGA-CU-A3KJ-01	18.46	LIVING	basal	-2.36049	-1.07711	-1.42687	-1.56819	-0.903968	-2.75194	-1.18114	-1.47331	-0.341821	-1.04739	-0.539853	-0.391824	-0.530147	-1.14307	-0.70211	-0.766431	-0.605674	-2.16784	-1.45695	0.108631	1.27369	0.59256	0.872025	1.20439	1.26983	0.659683	1.49333	2.24731	2.81054	1.29859	0.894107
	TCGA-G2-A2ES-01	32.98	DECEASED	basal	-0.886872	-0.05208	0.367628	-0.647374	-2.72823	-2.51903	-1.65542	-2.00315	-1.57953	-0.878671	-0.753618	0.155684	0.221747	-0.328911	-0.299844	0.483811	-0.624027	-2.16784	-0.927036	0.332327	0.794653	1.19717	1.61697	1.27344	1.54609	1.49333	1.55977	1.65579	1.87496	1.21146	0.81266
	TCGA-GC-A6I1-01	8.94	DECEASED	basal	-0.20329	-0.920936	-0.546514	-0.698794	-2.26024	-0.589955	-0.789071	-1.34465	-1.6665	-0.966615	-0.62002	-1.21532	-1.03263	-1.56468	-0.254729	0.603259	0.186488	-2.16784	-0.614695	0.600394	0.987459	1.4599	2.17644	1.44821	1.47297	1.54072	1.47526	1.76009	1.6391	1.1907	0.159918
	TCGA-FD-A3B5-01	8.94	DECEASED	basal	-1.23595	0.166391	-0.467113	0.226659	-0.448549	-0.42426	-1.46711	-1.11364	0.356538	-2.58812	-0.998207	-0.085344	-0.165406	-0.934427	-0.458802	0.565213	-0.02515	-2.16784	-0.383881	1.81974	1.13655	1.51759	1.97281	1.47834	1.63759	1.79281	1.20053	2.20899	2.75639	1.71063	0.609761
	TCGA-CU-A0YN-01	12.91	DECEASED	basal	-1.3855	0.144389	-1.50127	-0.480188	-1.04883	-1.01581	-1.06533	-0.783071	-0.586323	-0.008269	0.720191	-0.863733	-0.586805	-0.6841	-0.173701	-0.427691	0.488861	-0.686935	0.628809	1.85189	1.11129	0.743446	1.43815	0.819292	1.39626	1.68502	1.63145	2.39267	3.11616	1.23114	0.365449
	TCGA-C4-A0F1-01	2.92	LIVING	basal	-1.36965	0.071416	-2.16464	-1.01295	-0.937397	-1.81261	-3.35516	-2.10333	-3.64642	-2.58812	-2.55859	0.028766	-0.134779	-0.093232	-0.354655	1.20462	-0.3232	-2.16784	-0.136207	1.19747	1.86405	1.49073	2.30972	1.6187	1.83007	2.01288	1.16294	2.07279	-0.054535	1.54881	1.03738
	TCGA-DK-A6B5-01	50.66	LIVING	basal	-0.484928	-1.24226	0.473747	-0.742876	-0.355851	-0.4773	-0.273925	-0.658629	-1.55909	-0.684167	0.06324	-0.440901	-0.541461	-0.681304	-0.40321	0.623968	-0.264481	-0.123929	-0.651946	0.818016	1.05663	0.885604	0.748775	0.850132	0.910089	0.650026	0.973789	1.92106	0.365127	0.647456	0.612972
	TCGA-BT-A3PK-01	9.95	DECEASED	basal	-0.137036	-1.06691	-1.31004	-0.407918	-1.36031	-1.76446	-1.13946	-0.393586	-1.20881	-0.694691	0.415444	-0.063641	-0.056821	-0.411803	-0.202138	-0.191523	0.635956	-2.16784	-0.352188	-0.178793	0.215153	0.928353	0.285435	0.680777	0.91276	1.45061	1.03498	2.14041	3.26239	0.630061	0.018235
	TCGA-FD-A3SO-01	5.52	DECEASED	basal	-2.47614	0.48182	-0.461657	-0.826349	-1.26029	-0.192405	-1.20338	-0.304455	-0.986256	0.613514	-2.55859	0.321391	0.30352	-0.429631	-0.160627	0.417993	0.179921	-0.497931	-0.753923	-0.240412	1.1098	-0.041893	1.16616	0.581586	1.07464	1.34972	1.3496	1.46767	2.83195	0.823225	0.195384
	TCGA-C4-A0F7-01	2.04	DECEASED	basal	-0.390497	0.469759	0.580483	1.08303	-0.319657	-0.491794	-1.70613	-1.13747	-0.870988	-1.01613	0.225464	0.767692	0.532512	0.962543	0.517264	0.724301	0.253157	0.845717	-1.10537	2.35956	0.833224	0.497612	0.767362	1.67736	1.48026	0.920224	0.311312	-0.757585	-0.908412	1.38548	0.900794
	TCGA-CU-A72E-01	13.57	DECEASED	basal	-0.494913	0.313595	0.317039	0.501073	-0.336552	-0.376719	0.016493	-0.107209	0.176505	0.538695	-0.417957	0.853897	0.939865	1.33009	0.978665	0.644318	0.606519	0.84612	-0.319752	1.19551	1.14201	-0.241796	0.946387	1.31921	1.39668	1.32264	1.40865	0.869543	0.445078	0.884123	0.439381
	TCGA-2F-A9KR-01	104.57	DECEASED	basal	-0.993947	-0.433414	0.688912	0.734255	0.134076	0.455296	-0.828137	-0.62052	-0.67145	1.11073	0.365584	0.580276	0.559867	0.907117	0.647246	0.43128	0.065566	0.817774	-0.642765	1.7235	-0.022234	0.354918	0.575174	0.912106	0.984865	1.08018	1.10076	0.989255	1.11536	0.714408	0.640378
	TCGA-4Z-AA7Q-01	16.75	DECEASED	basal	-1.04367	-1.94836	-0.091233	0.439267	-0.180579	0.015539	-0.005538	-0.880661	-0.670562	-0.922294	-0.197098	0.373069	0.622505	0.855946	0.787391	0.577979	0.215625	0.775352	-0.421532	-0.414683	0.675171	-0.400125	0.038287	0.419937	0.904614	1.01243	0.993105	0.716527	-0.285767	0.999134	0.470563
	TCGA-DK-AA6S-01	165.9	LIVING	basal	-0.531824	-0.3242	0.461943	-2.81348	-0.938674	-1.30303	-0.423754	0.110347	-0.998521	0.933381	0.801167	1.01137	0.893368	1.01182	1.17325	0.640548	1.14861	0.86203	0.796559	0.720978	0.332347	1.41716	0.051547	1.2133	1.05717	0.687728	-0.509913	0.113621	-0.740115	-0.921264	0.13073
	TCGA-XF-AAN3-01	86.24	LIVING	basal	-0.290964	-0.009277	0.220998	-0.680935	-0.407229	-0.275522	-0.874673	-0.580876	-0.833654	-0.434063	-0.978181	1.25467	0.985049	0.95384	0.87052	0.830705	0.588827	1.00035	-0.332419	-0.270814	0.703614	0.066324	-0.546574	0.767425	0.585049	0.258704	1.08714	0.759476	0.534351	0.264329	1.0843
	TCGA-XF-AAME-01	92.9	DECEASED	basal	-1.71663	0.181366	-0.22105	-0.264962	-1.08029	-0.708925	0.039919	-0.613082	0.009911	0.880604	0.777546	1.75125	1.67018	1.96496	1.59437	1.60048	1.94944	1.15908	0.842711	0.704639	0.48093	0.792054	1.05122	1.10135	1.2729	1.51981	0.691879	1.51075	0.868213	0.781899	0.241464
	TCGA-FD-A3B8-01	12.61	LIVING	basal	-0.84844	-1.11148	-0.222852	-1.10715	-1.41212	-1.17351	-0.759723	-1.3878	-1.98355	-0.638376	0.253263	1.9744	1.96742	2.13984	1.66112	2.0052	1.58256	1.29897	-0.249481	-0.056235	0.906995	0.668149	1.30183	0.949697	1.22131	0.668332	0.246262	1.26989	-0.286703	0.632776	0.297961
	TCGA-XF-AAN4-01	27.04	DECEASED	basal	-1.83796	-1.42968	-1.10786	-1.17968	-0.871534	-0.948554	-0.966877	-1.74881	-0.887138	-0.303913	0.661601	2.73102	2.60568	2.77052	2.14664	2.35337	1.52974	1.75971	0.372339	-0.394099	0.543704	0.410366	0.283797	0.084849	0.963795	0.992228	0.328694	-0.248949	-0.513533	0.115745	-0.560519
	TCGA-GC-A3WC-01	17.74	LIVING	basal	-1.67399	-1.22496	0.294255	-1.11274	-2.31332	-1.99538	-0.865532	-1.38702	-1.00944	-1.0237	-0.026328	0.900158	1.13828	1.39647	1.35176	0.862238	0.577573	0.901235	0.196285	0.703225	0.702733	0.293215	1.35041	1.29227	1.12981	1.09211	0.607238	0.009224	-0.183266	0.976747	1.14439
	TCGA-K4-A5RI-01	11.7	DECEASED	basal	-0.8768	0.558451	0.509541	-1.0281	-0.257828	-0.910293	-0.745151	-1.0158	-1.74	0.175887	-0.938881	0.940217	1.02056	1.14207	1.09637	0.598724	0.762904	0.794562	-0.364188	0.52705	0.504953	0.279233	1.19793	1.16573	1.12638	0.635441	1.03819	0.660101	-0.393721	0.841485	0.865742
	TCGA-GU-A764-01	20.04	LIVING	basal	0.362612	-1.43597	-0.808023	-1.13166	-0.407287	-2.22396	0.137432	-0.452865	-1.22227	-0.841976	-0.077784	0.735322	0.921613	0.924364	1.28148	0.402488	1.75727	1.04482	-0.387689	-0.069807	0.390754	0.675941	1.60423	1.1199	0.53883	1.53273	0.426939	0.208455	0.283022	0.298616	0.137966
	TCGA-FD-A3SP-01	25.72	LIVING	basal	-0.119812	-1.46975	-2.37676	-0.970328	-0.685259	-0.854852	-1.43123	-0.617791	-1.43397	0.035801	0.482657	1.34511	1.2467	1.31342	0.928052	1.18235	1.25204	0.836495	0.792971	0.218361	0.794184	0.865143	-0.193016	0.851004	0.113714	0.909801	-0.277844	-0.283178	-1.04829	-0.892285	-0.130137
	TCGA-BL-A5ZZ-01	12.39	LIVING	basal	-0.868605	-0.987567	-1.67725	0.02244	-1.77544	-1.32672	-0.255763	-0.482644	-0.274506	-0.384861	-0.560885	1.06402	0.931106	-0.004501	0.868279	1.63934	1.50365	-0.165183	2.59038	0.706166	1.04153	0.496291	0.049671	0.689681	0.559007	0.834118	-0.144159	0.217311	-0.032108	0.425082	0.209131
	TCGA-ZF-AA58-01	54.17	LIVING	basal	-0.292342	-1.81344	-2.81655	-0.788498	-1.96087	-2.35427	-1.21835	-1.86095	-1.24152	0.024217	-2.55859	0.811058	0.824608	0.729556	0.996878	0.594339	0.148591	0.666854	-0.770005	-0.222423	1.06146	1.24777	0.894499	0.586771	0.535968	-0.475178	-0.11476	-0.152974	-0.179865	0.461894	0.474711
	TCGA-DK-AA6L-01	38.21	DECEASED	basal	-0.229724	0.569777	0.192042	0.251071	0.014073	0.321513	-0.049501	0.118421	0.457959	-2.58812	-2.55859	-0.085995	-0.036405	-0.226999	-0.051973	-0.261395	-0.488873	0.371917	-1.50492	-0.327969	0.425646	1.30357	-0.238754	0.908145	0.540009	0.570358	1.10489	1.23712	1.09353	0.442745	0.430974
	TCGA-XF-AAN2-01	61.4	DECEASED	basal	1.85191	0.718471	0.120635	0.452953	-0.470733	0.277886	-0.442739	-0.182172	-0.057924	-2.58812	-2.55859	-0.58892	-0.77128	-0.728296	-0.052518	-0.430121	-1.38228	-0.383568	-0.905245	0.916467	0.495551	0.376384	0.578778	0.897624	1.32105	1.09871	1.27736	1.7639	1.68271	0.474558	-0.353779
	TCGA-FD-A6TD-01	12.68	DECEASED	basal	0.227178	0.09368	0.141219	0.301587	-0.510534	-0.137053	0.170675	-0.332445	-0.286256	-0.600629	-0.246041	-0.776604	-0.032313	-0.688061	-0.126472	-0.142906	-0.207582	-0.260555	0.09821	-0.165437	0.621763	1.04311	0.348252	0.87601	0.927205	0.628204	0.707967	1.8589	0.784353	0.655241	0.146528
	TCGA-2F-A9KT-01	108.87	LIVING	basal	0.416377	0.874809	-0.234155	0.820205	-0.014787	0.243082	-0.400106	-0.129021	-0.198837	-0.182264	-0.616165	-0.079045	-0.360494	-0.685703	-1.11769	-0.281919	0.082027	-0.176406	-0.417175	1.23227	0.40574	0.730661	1.21779	0.350976	0.895083	0.467561	0.034024	0.942456	1.25487	0.669234	0.404537
	TCGA-4Z-AA81-01	41.72	DECEASED	basal	1.39434	0.672985	-0.306998	1.00556	-0.345377	0.539953	-0.040289	-0.301884	-0.566148	-2.58812	-0.217773	-1.73688	-1.44223	-1.40277	-0.887274	-0.1179	-0.768214	-2.16784	-1.04936	-0.431465	1.13808	0.388514	0.333557	-0.572964	1.06854	1.48094	1.52594	1.03916	-0.826507	0.677335	-1.80651
	TCGA-XF-A9T6-01	2.1	LIVING	basal	0.74365	0.433241	-0.87232	0.558865	-0.363664	-0.191311	-0.637089	-0.326514	-0.783993	-0.347653	0.448024	-0.899463	-1.03035	-1.16115	-0.060889	0.731984	-1.25783	-2.16784	-2.37408	-0.235968	0.755465	0.952609	0.699378	0.887181	0.96386	0.891745	1.49485	0.212963	0.644736	0.446217	-0.20844
	TCGA-ZF-A9RE-01	3.48	DECEASED	basal	-0.596849	0.421007	0.772552	0.385204	-0.988694	-0.885619	-1.55943	-1.115	-1.21345	0.092861	0.299827	-1.63575	-1.77251	-1.14248	-2.58277	-0.717227	-1.27792	-0.463784	-0.668901	0.461421	0.405399	0.036061	0.839347	1.43096	1.40152	1.57556	0.818602	0.620768	2.45925	1.28408	1.5863
	TCGA-E5-A4TZ-01	15.34	DECEASED	basal	-1.31153	-0.100529	-0.032821	0.89133	-1.24005	-0.799431	-1.08518	0.285628	0.206544	-2.58812	-0.276406	-1.69772	-1.42429	-1.13068	-1.29791	-1.10028	-1.72206	-0.100095	-2.25595	1.69592	0.634376	-1.53642	-0.232695	1.1062	0.984079	0.689872	1.21491	1.61123	1.78311	1.35951	0.639038
	TCGA-DK-A3X2-01	17.97	DECEASED	basal	-1.51921	-1.38694	0.139747	-0.297605	0.441959	-0.292908	-0.647614	-0.403563	-0.37841	-1.28585	0.141373	-1.33505	-1.68687	-1.68216	-2.58277	0.26048	-1.19673	-0.446112	-0.21378	1.742	0.043329	0.148374	1.03321	1.00173	0.759515	0.605698	-0.08687	0.081258	0.946174	-0.613863	1.03034
	TCGA-K4-A3WV-01	21.22	LIVING	basal	-0.880416	0.692858	0.619214	0.755641	-1.57178	-1.3412	-1.2323	-1.30963	-0.380183	0.290078	-0.721031	-0.133003	-0.161457	-0.202553	0.389284	0.368945	-0.429863	0.418917	0.677038	1.06822	-0.37586	0.190325	-0.152881	0.019638	1.31374	0.926795	1.02808	0.417545	-0.4989	-0.037483	0.245957
	TCGA-BT-A20V-01	5.06	DECEASED	basal	0.276319	-0.376925	-0.312808	-0.361502	-0.457775	-1.72376	0.102597	-0.704209	0.16569	0.216387	0.407724	-1.24674	-1.14888	-1.13631	-0.758265	-0.346579	-1.42738	-0.421289	-1.23199	-0.066865	0.031577	1.61197	-0.506972	1.21178	0.023373	0.296197	0.830307	0.113831	-0.275923	0.482493	0.394554
	TCGA-BT-A0S7-01	6.57	DECEASED	basal	-1.79781	0.259081	-0.758815	0.136762	-0.189126	-1.19164	-1.43782	-1.00171	-0.134313	-0.58702	-2.55859	-0.679252	-0.269476	-0.685639	-0.529001	0.237677	-0.373335	-2.16784	-1.37144	1.4208	-0.353975	-2.67541	-0.535318	0.888025	0.392822	0.275294	-0.891034	2.3628	-0.320712	1.53709	0.421349
	TCGA-KQ-A41S-01	1.15	LIVING	p53-like	-0.712165	0.751163	0.36996	-0.343489	0.185096	0.213713	0.769444	0.663217	0.728773	0.494648	1.28088	-0.052711	-0.001194	0.4282	-0.662083	-0.013588	2.02799	0.483816	1.01222	-0.336304	-0.599956	-1.60915	-0.981095	-0.032283	-0.801466	0.14861	0.906913	-0.987014	-0.726288	-0.112464	-0.660726
	TCGA-G2-A2EO-01	59.26	DECEASED	p53-like	0.69858	0.072391	0.711623	0.695351	0.777434	0.389723	0.315271	0.251598	0.051792	0.270347	-0.105941	0.74633	0.649164	0.141474	0.247535	0.021504	0.929649	0.264922	-0.300022	-0.783074	-0.432411	0.021505	-0.359428	0.554929	-0.127846	-0.439504	-1.58118	-0.388965	-1.3812	-1.08676	0.140585
	TCGA-XF-A9SK-01	15.97	DECEASED	p53-like	0.112039	0.337412	0.038591	-0.073501	0.53302	-0.226992	0.70057	0.526982	0.913403	-0.169454	-0.390247	0.816881	0.768195	0.655716	0.624762	0.529898	0.953958	0.77393	0.746295	0.112594	-0.317717	0.699876	-0.700592	0.666555	-0.698105	-0.537223	-0.051487	1.77126	-0.044672	0.627821	0.388686
	TCGA-MV-A51V-01	13.47	LIVING	p53-like	1.2951	0.798982	0.300922	1.32624	0.326033	1.22471	1.13576	1.19453	1.00333	-0.294206	0.953212	-0.2172	0.005601	0.207502	-0.379999	-0.306032	0.059664	0.009847	1.17153	-2.26859	-1.97808	-1.21544	-0.271577	-1.48864	-1.48265	0.055879	0.127864	-0.462189	-1.11203	-0.25913	-0.929508
	TCGA-E7-A6ME-01	24.01	LIVING	p53-like	0.094701	0.413287	0.580375	0.609836	0.83112	0.529212	0.726063	0.950435	0.863634	0.45148	1.28432	-0.154914	-0.007268	0.164096	-0.07255	-0.208393	-0.030025	0.576569	0.298407	-2.26859	-1.48697	-0.641314	-1.19896	-0.52195	-0.751498	-0.380508	-1.03186	0.370934	-0.161966	-0.369003	-0.296205
	TCGA-UY-A78O-01	75.95	LIVING	p53-like	0.625658	0.814332	0.717113	0.76039	0.835032	1.15193	1.12994	1.27665	1.31321	1.16367	-0.10136	-0.193778	0.065361	0.078226	0.358769	-0.429378	-0.168325	0.333848	-0.916783	-0.307968	-1.33214	0.032719	-0.05905	-1.48045	-1.44598	-2.03862	-0.718801	-0.610503	0.424166	-0.203887	0.247044
	TCGA-DK-A1A7-01	18.4	LIVING	p53-like	0.190546	0.066211	0.649508	0.937717	1.26294	1.15931	0.884032	0.779649	0.916487	1.02642	1.18026	-0.287195	-0.118378	0.313697	-0.441942	-0.415649	1.21049	0.178998	0.011437	0.596903	-0.931414	-0.26346	-0.359581	0.126903	-0.200466	-0.205533	-0.90492	-0.912976	-0.482158	0.428692	0.478825
	TCGA-BT-A20W-01	8.34	DECEASED	p53-like	0.8902	0.798953	0.538386	0.984336	0.881029	0.830657	1.1965	0.988088	0.959369	1.12551	1.28531	-0.268604	-0.300604	0.205609	-0.194536	-0.419211	0.456931	-0.056093	0.665622	0.549296	-0.93401	-0.296646	-0.231705	-0.895931	-0.698274	-0.35623	-0.866394	-0.577298	-0.221547	-0.237428	0.436657
	TCGA-CU-A3YL-01	29.76	LIVING	p53-like	0.534759	0.768929	0.440165	0.53465	0.001598	0.40476	0.934321	1.26029	0.877677	1.64629	1.13904	0.315208	0.299483	0.268665	-0.011902	-0.137977	0.129953	0.429674	0.274161	-0.250208	-0.208971	-0.972128	-0.248931	-0.663477	-0.778764	-0.430256	-0.363156	-1.08037	0.068229	-0.862418	0.100817
	TCGA-CF-A9FF-01	11.86	LIVING	p53-like	1.04192	0.707507	0.468856	0.954487	0.775874	0.509234	0.911277	0.880801	0.678154	0.85738	1.19979	0.299622	0.42794	0.709706	-0.061942	0.130421	0.979778	0.23801	0.14749	-0.156016	-0.542865	-0.346251	-0.468119	-0.480821	-0.597195	-0.253402	-0.060639	-0.67994	-0.271447	-1.08589	0.079782
	TCGA-DK-A3IK-01	4.8	DECEASED	p53-like	0.733861	1.09784	0.61359	0.852348	0.88406	0.632355	1.50376	1.3087	1.13077	0.464488	0.831408	0.651434	0.603929	0.898561	0.784718	0.197986	1.02206	0.594642	-0.180774	0.598169	-1.12825	-0.827106	-0.017883	-0.067442	-0.332164	-2.03862	-0.097358	-0.43308	-0.460045	0.379264	0.146609
	TCGA-UY-A9PF-01	3.84	LIVING	p53-like	1.11292	1.30218	0.734785	1.24269	0.758364	0.73454	0.870619	1.20253	1.53828	1.24351	1.40886	0.790569	0.580154	0.994273	0.946238	0.286579	0.751237	0.563684	-0.15414	-0.42424	-1.19192	-0.243275	-0.356986	-0.635861	-0.909275	-2.03862	-0.471325	-0.882931	-0.968472	-0.399928	0.258408
	TCGA-GD-A3OP-01	2.1	LIVING	p53-like	-0.111599	0.975555	0.873898	0.893917	0.616416	0.756744	1.274	1.15	1.49606	1.10656	1.33935	0.376376	0.160786	0.685019	-0.47879	0.285957	1.40582	0.326914	1.0842	-0.740101	-0.125103	-0.659507	-1.21742	-0.299495	-1.28245	-0.766819	-0.335169	-1.51811	-0.80534	0.451123	0.446824
	TCGA-CF-A7I0-01	12.09	LIVING	p53-like	-0.546206	0.671116	0.443613	0.87793	0.290776	0.489261	0.981682	0.921822	1.26899	1.08953	1.4992	0.767438	0.864252	1.17436	0.87443	0.707403	1.28018	0.49204	0.556083	-0.561913	-0.352338	-0.065345	-0.300006	-0.486035	-1.63745	-2.03862	-0.213493	-1.31178	-0.453089	0.40474	0.166502
	TCGA-CF-A1HR-01	12.78	LIVING	p53-like	0.252085	0.723573	0.579864	-0.04605	0.392481	0.442617	0.77954	0.892275	1.08023	1.16693	1.17132	0.345774	0.260201	0.351946	-0.196175	0.255174	1.06887	0.200844	0.579114	-0.304189	-0.411706	-0.015974	-1.51328	0.304438	-1.14145	-2.03862	-0.176325	-0.686108	-0.786015	-0.510685	0.31507
	TCGA-XF-AAMZ-01	44.28	DECEASED	p53-like	-0.009946	0.594492	0.635937	0.953962	0.796654	0.902877	0.764507	0.63563	0.745085	0.944328	0.920982	0.26019	0.294713	0.454671	0.442781	0.144148	0.308921	0.333777	0.484119	0.032694	-0.221811	-0.270054	-0.078721	-1.66512	-0.967391	-2.03862	-0.944439	-0.854808	-0.372683	-0.438991	0.217416
	TCGA-E7-A97Q-01	8.08	DECEASED	p53-like	0.325561	1.23936	0.727984	0.937818	0.76953	0.616045	1.38724	1.30205	1.32548	0.64116	0.863892	0.576096	0.415295	0.605719	0.101916	0.599247	1.09835	0.40454	0.115191	-0.296098	-1.40767	-1.67152	-0.451396	-0.763955	-0.604488	-0.402966	-0.728378	-0.912849	0.401369	-0.099248	-0.603114
	TCGA-YF-AA3L-01	11.96	LIVING	p53-like	0.437991	0.472609	0.662099	0.553674	0.786486	0.514397	0.993675	0.536237	1.01272	1.35225	0.782613	0.30347	0.202714	0.148809	-0.700883	-0.191438	0.191703	0.237016	0.662746	-0.310486	-0.466061	-0.450589	-1.11828	-1.90205	-1.74896	-0.621333	-0.326264	-0.613414	-0.816838	-0.378528	0.253023
	TCGA-FD-A5BV-01	5.35	DECEASED	p53-like	0.549131	0.92474	0.529217	0.967569	0.77434	0.581891	0.827202	0.666037	0.951484	0.997091	0.906201	-0.200052	-0.214579	-0.317222	-0.191674	-0.57318	0.444895	0.076699	-0.099573	-0.080037	-0.856934	0.259473	-1.35256	0.079166	-0.50997	-2.03862	-0.881759	-1.58274	0.01516	0.808151	0.262983
	TCGA-FD-A62O-01	7.1	DECEASED	p53-like	0.814927	0.874526	0.805499	0.735069	0.673826	0.822815	1.18575	0.910651	1.04204	1.10837	0.260932	0.295151	0.25511	0.662621	0.119081	0.108829	0.534066	-0.018478	3.28357	0.201542	-0.479403	-0.167162	0.321442	-0.421557	-0.912576	-0.790337	-0.153495	-0.423195	-0.943856	-1.35339	0.522904
	TCGA-G2-A2EK-01	15.93	LIVING	p53-like	-0.133234	0.597754	0.608858	0.489388	0.660608	0.418089	0.644824	0.573791	0.835068	0.838559	0.926003	0.804457	0.788057	1.23727	0.040496	0.806999	0.83208	0.922232	2.15123	0.373121	-0.414269	0.364827	-0.295665	0.585352	-0.547251	-0.519012	0.04997	-0.016213	0.575792	-1.37349	0.393934
	TCGA-G2-A2EC-01	22.86	DECEASED	p53-like	-0.594855	1.00062	0.642721	-1.14636	1.07266	0.722711	0.891398	0.674979	0.982778	1.41201	1.81951	0.70472	0.703663	1.0976	0.220614	0.525676	1.62248	0.804196	1.27193	-0.658597	-0.273521	0.209925	-0.623457	0.111663	-0.457781	0.223594	-0.415942	0.127612	-0.981954	-0.613407	0.694379
	TCGA-FD-A6TI-01	9.66	DECEASED	p53-like	1.11741	1.18561	0.303001	-0.20249	0.750772	0.450793	0.962347	1.15906	1.09346	0.912176	1.12666	0.49523	0.61098	0.825305	0.733601	0.469014	1.11664	0.697865	-0.505458	-0.877473	-1.48711	-0.519169	-1.18289	0.452014	-0.445644	-0.567497	1.05198	-0.38562	0.823421	0.183998	-0.339661
	TCGA-KQ-A41N-01	52.69	LIVING	p53-like	1.00335	1.23332	0.604257	-0.285852	0.335188	0.890977	1.14697	1.29883	1.22581	0.842663	0.62901	0.433545	-0.155654	-0.149679	0.250356	0.274744	0.098417	0.348202	-1.25381	-0.532067	-2.16094	0.399226	-0.246255	-1.01747	0.304041	-0.596328	-0.464091	-0.744607	0.575254	0.200369	0.222922
	TCGA-FD-A3NA-01	60.61	LIVING	p53-like	0.747989	1.09608	0.542161	0.927575	1.12126	0.689491	0.564791	0.915297	1.02137	0.605777	-0.13276	0.236846	0.059791	-0.404835	-0.030811	-0.030422	0.264434	-0.474425	0.928831	-0.059978	0.526064	0.557447	0.71089	0.255836	0.572184	0.642673	-0.200221	0.977135	0.272864	0.504119	0.572219
	TCGA-CF-A47T-01	12.65	DECEASED	p53-like	0.644758	0.840368	0.554169	0.911206	1.00814	0.999905	0.048353	0.950418	0.569773	1.38761	0.733603	0.119217	0.025783	0.176298	-0.104682	-0.647423	0.15992	-0.191644	-0.001728	0.589228	0.188347	-0.068623	0.314634	0.400957	0.266079	0.409417	0.131189	0.867256	-0.265171	0.274376	0.606476
	TCGA-CU-A5W6-01	1.84	DECEASED	p53-like	0.521274	0.609779	0.434886	0.369048	0.600061	0.28231	1.0809	0.70966	0.463653	0.54692	0.64367	0.02547	-0.005531	0.115077	0.284316	-0.280151	0.22637	0.555045	-0.115003	0.791363	-0.243299	-0.316876	-0.007408	-0.223431	0.017712	0.213232	-0.365654	0.810966	0.196638	0.351283	0.218894
	TCGA-CF-A3MF-01	12.58	LIVING	p53-like	1.18879	0.665887	0.269175	0.469851	0.650811	0.833226	0.904289	1.02547	0.781564	0.956714	0.835767	-0.20758	-0.190515	-0.079792	0.097732	-0.603573	-0.280932	0.062849	-0.440265	-0.566641	0.248335	-0.284966	0.695411	-0.046967	-0.186849	-0.22057	-0.915717	0.618695	0.554447	-0.348079	-0.082222
	TCGA-CF-A3MI-01	12.16	LIVING	p53-like	1.18359	0.60344	0.50429	0.892666	1.0683	1.08993	1.27733	1.40677	0.92683	0.891915	0.872813	0.078326	-0.085492	0.189689	-0.181742	-1.09055	0.022722	0.235676	-0.696318	-0.373404	-0.516932	-0.225817	0.052681	0.167198	0.14131	-0.401428	-0.024462	0.054352	-0.154226	0.24548	0.355673
	TCGA-DK-AA75-01	11.17	DECEASED	p53-like	0.960292	0.267799	0.187778	1.15792	0.545204	1.41247	0.785823	1.04362	1.1545	0.171153	0.483505	-0.195989	-0.229912	-0.225284	-0.090314	-0.641888	-0.957444	0.125954	0.725463	0.328782	-1.48278	-0.739179	0.29927	0.25685	0.027068	0.109044	-1.4188	-0.137264	0.240812	-0.016003	-0.512079
	TCGA-E7-A7PW-01	13.67	LIVING	p53-like	-0.234061	0.713685	0.470439	0.841243	1.44067	0.910852	0.976836	1.18105	1.32496	0.214105	0.434313	-0.573436	-0.593464	-0.590212	0.057679	-0.986463	-1.04719	-0.006169	0.806649	1.16092	-0.907353	-0.402302	0.40549	0.283433	0.338275	0.387697	-0.240804	-0.484462	-0.2763	-0.166803	0.557111
	TCGA-FD-A43N-01	22.96	LIVING	p53-like	1.25103	1.01807	0.208667	0.995466	0.823304	0.64714	-0.219309	1.025	0.704964	0.19584	0.243169	-0.090546	-0.128535	-0.450833	-0.041711	-0.091738	0.733149	0.037747	1.35992	0.148138	-0.891364	-0.63808	0.40017	-0.519861	-0.424003	-0.139328	-0.064969	0.206031	-0.721881	-0.072893	-0.052568
	TCGA-UY-A78N-01	86.76	DECEASED	p53-like	-0.181378	-0.884609	0.8505	0.989148	0.9192	0.292758	-0.979251	0.781686	0.844278	1.11806	0.063693	1.21922	1.11208	1.17543	1.23161	0.906614	0.599259	1.05608	1.59487	0.545315	-2.13081	-0.376632	-0.355973	-0.103388	-0.232121	-0.473416	-1.56831	-0.849698	-0.154675	0.660917	0.624132
	TCGA-FD-A6TC-01	6.14	LIVING	p53-like	0.28786	0.953003	-0.161221	0.070526	0.087335	-0.318572	0.813341	0.496618	0.53756	-0.682337	-0.718368	0.956635	0.833751	0.796847	0.575764	0.584707	0.744757	0.792707	-0.218036	-0.233698	0.546914	0.5427	-1.37837	-1.30182	-1.64391	-0.599566	-0.689456	-0.776868	-0.926456	0.825568	0.529092
	TCGA-XF-A9SZ-01	28.22	DECEASED	p53-like	1.33628	1.06671	0.344006	0.15337	0.095605	0.277008	0.582689	0.738728	-0.103263	-0.621628	-0.831059	0.99255	0.805215	0.278974	0.477011	0.437539	0.641651	0.509258	-0.098013	-0.358025	0.185642	-1.28316	-0.837081	-1.20453	-0.90187	-0.225492	-0.856863	0.3536	-0.414299	0.662343	-0.07318
	TCGA-UY-A9PD-01	17.81	LIVING	p53-like	0.683547	0.827512	0.666939	1.14009	0.892511	0.819797	1.29738	1.16551	1.47288	-0.868315	-2.55859	0.562816	0.740926	0.761653	1.04356	0.376998	0.386493	0.599735	-0.5469	0.039362	-0.868079	-2.78845	-0.625438	-0.51781	-0.565717	-0.550351	-0.537597	-0.679693	-0.872318	0.710169	0.183509
	TCGA-XF-A8HF-01	97.04	DECEASED	p53-like	0.450707	1.35612	0.425671	-0.046253	1.04544	0.927347	-0.074051	1.31592	1.34931	-0.47284	-2.55859	0.703607	0.448208	0.289908	0.744817	-0.000485	0.666364	0.357195	-0.276196	0.931873	-1.18975	-0.142887	-0.465642	-1.25246	-0.661117	-0.364117	-0.910129	0.147718	-0.967354	0.875926	0.244168
	TCGA-DK-A3IL-01	13.57	DECEASED	p53-like	0.484333	0.836917	0.411719	-2.81348	0.78198	0.05327	1.16146	1.25417	1.36352	-0.673222	-0.655863	1.3217	1.37769	1.78144	1.60919	1.31563	0.872994	1.05095	-0.955657	1.05471	-0.134296	-1.25136	-0.576118	-0.86454	-0.462157	0.1326	-0.255121	-0.349683	-0.716429	-0.824851	0.250873
	TCGA-ZF-AA52-01	35.38	DECEASED	p53-like	0.064689	0.587543	0.113052	0.496679	0.226054	-0.036826	-0.723065	0.22679	-0.098483	0.412223	-2.55859	1.28336	1.36695	1.31311	1.32493	1.16043	1.43575	1.29649	0.490913	-0.097723	-0.38467	-1.48557	-0.433141	-0.306755	-0.226652	0.188871	-0.127043	0.302952	0.615876	-0.465753	-2.21333
	TCGA-FD-A6TF-01	2.27	DECEASED	p53-like	0.681898	0.712143	-0.449822	0.770151	0.264222	-0.48526	-0.701657	-0.317252	-0.262446	-2.58812	0.067385	1.57162	1.65322	1.58713	1.5215	1.45502	1.1559	1.16415	-0.459778	0.111609	0.14955	-1.8176	-0.30458	0.085545	0.191342	0.740569	-0.371428	0.25406	0.789564	0.573079	-3.57648
	TCGA-FT-A61P-01	11.07	LIVING	p53-like	1.58268	0.645707	-0.092765	0.058514	-0.23629	0.302341	-1.05674	-0.009005	-1.22251	-0.993065	0.309873	1.38949	1.48673	1.68667	1.41825	1.73469	1.10963	1.1203	1.47708	-0.289902	-0.37349	0.388376	-0.106542	-0.937705	0.241031	0.322447	0.831934	-0.478086	-0.268781	-0.429391	-2.54648
	TCGA-DK-A2HX-01	46.65	DECEASED	p53-like	0.906006	0.829329	0.093116	0.878471	-0.024361	-0.041407	0.922194	0.304982	-0.436489	-0.795199	0.281414	1.97274	1.83247	1.97518	1.3167	1.79309	1.73714	1.38827	1.16041	-0.037948	-0.328711	-0.324814	-1.92497	-2.05193	-1.26571	-0.045043	0.610277	-0.808556	-0.663779	-0.134878	-3.28299
	TCGA-GU-AATP-01	32.95	LIVING	p53-like	1.36429	0.918983	0.518752	1.01643	0.639891	0.895794	1.0878	1.06143	1.03653	-0.682864	0.215067	0.838322	0.573717	-0.240786	-0.322489	0.120913	1.32181	0.111857	0.985755	-0.494114	-1.18577	-0.274457	-0.6215	-0.869575	-0.511932	-0.31746	-0.556504	-0.031586	-0.37179	-1.26294	-1.26657
	TCGA-FD-A3SR-01	19.78	DECEASED	p53-like	0.990775	1.1091	0.098675	0.615118	0.560983	-0.025629	0.850152	1.00567	1.07052	-1.26806	0.149637	1.05911	1.12156	1.69896	0.983101	0.982092	1.24521	1.09804	0.38638	-0.104195	-0.88746	-2.03116	-1.11299	-1.04534	-0.918286	-0.608696	-1.46727	-0.516029	0.132114	-0.900851	-2.48439
	TCGA-DK-A1A3-01	21.85	DECEASED	p53-like	1.56899	1.00669	0.489616	1.02294	0.254641	0.328212	0.907297	1.20014	1.00615	-0.241792	1.17826	0.358679	0.460727	0.822488	0.14229	0.688313	0.928382	0.599267	0.860167	0.054181	-1.06719	-2.2246	-0.527565	-0.721895	-0.455288	0.088462	-1.45643	-0.712325	0.409708	-0.711049	-1.87488
	TCGA-5N-A9KI-01	2.5	DECEASED	p53-like	1.35592	0.62723	0.192954	0.667048	0.153934	0.337625	1.20838	0.601836	0.698433	0.241488	-0.091077	0.942946	0.805944	1.11487	0.651127	0.667803	0.519625	0.962653	0.564416	0.157038	-0.752517	-1.16783	-0.746315	-0.888683	-0.474026	-0.059067	-0.273014	0.972553	0.669414	-0.946573	-2.47184
	TCGA-YC-A8S6-01	9.63	LIVING	p53-like	-0.030675	0.207661	0.435726	0.120292	-0.170392	0.367871	0.269875	0.514086	0.030702	0.769823	1.55227	0.539091	0.685811	0.831802	0.175621	0.167656	1.07806	0.073428	0.699331	0.472475	0.258924	0.254363	0.557805	0.554923	0.593618	0.258461	-0.619834	-0.109204	-0.384368	0.244152	-0.044713
	TCGA-ZF-A9RC-01	94.22	LIVING	p53-like	0.629251	0.588207	-0.339367	0.947635	0.246663	1.12354	-0.195099	0.631386	0.59045	0.527838	-0.125562	1.18239	1.29428	1.48154	1.11342	1.07872	1.13997	1.10888	2.23149	0.540716	-0.029054	0.310073	1.65475	0.153179	0.089775	-0.089421	0.229069	-0.246128	-0.749633	0.021734	0.086134
	TCGA-BT-A2LB-01	16.16	DECEASED	p53-like	0.24208	1.62713	0.198677	1.00077	0.652431	0.269718	1.01517	0.69134	0.780907	-0.093475	-0.263448	0.937459	0.990605	0.918551	1.0528	0.853815	0.698723	0.835338	0.157271	0.563678	-0.225529	-0.527722	0.403243	0.680763	0.612518	0.51646	-0.320577	0.635645	-0.341184	0.316766	0.396194
	TCGA-BT-A20T-01	14.88	DECEASED	p53-like	0.071692	0.655692	0.408705	-0.471007	0.626667	0.40575	0.943593	0.756875	0.672982	1.18138	0.779544	1.08279	1.00263	0.515326	0.803903	0.56332	1.00933	0.257841	1.07044	1.25778	0.102674	-0.376621	0.663407	0.883621	0.509746	0.622902	0.630083	0.955371	-0.523975	0.930742	0.706973
	TCGA-FD-A5BR-01	26.71	LIVING	p53-like	-0.668454	0.5843	0.48011	1.18446	0.828063	0.423103	0.904335	0.85946	1.12916	1.53524	1.06789	0.990367	1.02493	1.26703	1.12822	0.70758	1.01137	0.91398	0.744159	0.803259	0.185119	0.64053	1.13773	0.487613	0.696148	0.51709	0.511773	0.885745	-0.225539	0.803002	0.480972
	TCGA-K4-A4AB-01	2.76	LIVING	p53-like	-0.206835	0.826756	0.586228	-0.504584	0.419339	0.191879	0.324754	0.124125	0.809449	1.52954	0.55319	1.31817	1.27966	1.2345	1.20589	1.13195	0.746501	0.963504	0.705488	-0.36044	0.02874	0.359481	0.380559	0.853756	0.461078	0.143032	0.079643	0.786463	0.068799	0.315332	0.400741
	TCGA-DK-A1AF-01	17.61	LIVING	p53-like	0.088275	0.886843	0.374072	0.864186	-0.124173	0.013612	1.05703	0.701984	0.323176	0.390585	0.455145	0.521706	0.603094	0.68456	0.467272	1.04863	1.925	0.341887	0.662538	0.253624	0.498406	-0.026263	0.7566	0.773644	0.870004	0.65365	0.498562	-0.561603	0.165829	0.586042	-0.279027
	TCGA-K4-A6MB-01	15.41	LIVING	p53-like	0.044738	0.797735	0.342185	0.883608	0.297992	0.242412	0.611811	0.824451	0.949009	0.349731	0.697207	0.965289	0.651315	0.740321	1.11591	0.701406	1.12357	0.469221	0.505405	1.73445	-0.821173	-0.209851	-0.150429	0.214451	0.34923	0.223726	-0.176707	0.878876	0.935524	-0.868797	0.367747
	TCGA-FD-A5BZ-01	27.43	DECEASED	p53-like	1.42605	-0.670746	0.114196	0.736042	0.381512	0.143678	0.900276	0.909281	1.12907	-1.16031	-0.183645	1.09404	1.15146	1.02771	1.04147	0.855464	1.52527	0.829272	1.31313	0.950488	0.055997	-0.155778	-0.368777	-0.070325	-0.264939	0.134437	-0.205262	-0.059949	0.187611	-0.010326	0.140562
	TCGA-ZF-A9R9-01	28.38	DECEASED	p53-like	-0.219248	0.429205	0.342318	1.16685	0.784157	0.687034	1.16667	0.637239	0.775769	0.51334	-0.325235	1.53634	1.47306	1.65725	1.22982	1.1136	1.86502	1.16196	2.68794	-0.187335	0.879587	-2.14703	-1.21909	-2.10897	-3.4006	-2.03862	-1.2823	-0.566569	-0.57764	-3.12971	-0.068557
	TCGA-GD-A2C5-01	26.68	LIVING	p53-like	-0.079912	0.523035	0.75138	0.232051	0.598329	0.168835	0.999599	-0.072662	0.658221	-0.124602	0.03349	0.440139	0.692605	0.990331	1.02862	0.336657	0.850203	0.691297	-0.31684	-0.050752	-1.12355	-0.776148	-0.593454	-1.13101	-1.85593	-2.03862	-0.951565	-1.27466	-0.455652	-1.51756	0.191501
	TCGA-XF-AAMJ-01	54.86	DECEASED	p53-like	-1.6335	-0.672725	0.126549	0.522251	0.823094	0.31125	0.84723	0.336512	0.550619	1.51044	-0.056525	1.11501	1.11547	0.838896	0.909854	1.13494	1.47515	0.736452	1.01343	-0.491315	0.412445	0.301465	-0.368886	-0.226966	-1.56724	-2.03862	-0.679019	-0.467088	-0.749633	-1.1212	0.316404
	TCGA-DK-A3IQ-01	17.71	DECEASED	p53-like	-0.649527	0.370462	-3.06817	0.636959	-0.155016	-0.456427	0.540734	0.198455	0.560199	-0.522133	0.069063	2.07794	1.9175	2.16547	1.42279	1.97011	2.1661	1.4651	1.7163	0.087241	0.644358	-1.08261	-0.44506	0.567279	-0.875872	-0.40167	-0.345596	-1.26058	-1.19494	0.873586	-0.262451
	TCGA-E7-A6MD-01	4.24	LIVING	p53-like	-0.198082	0.183335	0.655594	0.73086	0.730269	0.545595	0.137768	0.629016	0.323891	0.302611	0.206519	0.623867	0.817152	1.02145	0.869524	0.797374	0.84295	0.845372	0.29885	0.045051	-0.191064	-0.997892	-0.352221	0.486052	0.125859	-0.050589	0.202501	-0.444595	-0.840496	0.433678	0.670548
	TCGA-UY-A9PE-01	6.21	LIVING	p53-like	1.0501	0.588246	0.507282	0.766697	0.808597	0.54206	0.892547	0.908238	0.628811	-0.547525	-0.684987	0.692615	0.823111	0.982787	0.952407	0.427889	0.743503	1.00245	-0.411176	0.770196	-0.549305	-0.071671	0.107995	-0.411541	-0.111046	0.56983	-0.819426	0.209339	-0.612343	-0.009689	0.154736
	TCGA-DK-A1AD-01	112.35	LIVING	p53-like	0.197246	0.871996	0.557316	0.918849	0.95452	0.690869	0.673116	1.02132	0.432121	-0.950935	-0.429145	0.977745	0.994461	1.3467	1.18169	0.857519	0.742986	0.990094	0.230256	0.576064	0.449677	-0.899895	-0.611181	-0.349878	-0.368758	-0.235868	-1.08265	-1.26783	-1.2433	-0.897636	0.830482
	TCGA-XF-A8HH-01	1.87	DECEASED	p53-like	1.37399	1.15137	0.320802	1.32119	0.704508	0.472573	1.02058	1.0132	1.23694	-1.16763	-0.071146	1.39522	1.3176	1.57614	1.29955	1.18047	1.10781	1.16896	-0.283209	-0.262252	-0.861652	-1.58166	-0.331771	-0.778403	-0.992102	-0.622935	-1.01931	-0.848257	0.053794	-0.320268	0.238746
	TCGA-DK-A2I1-01	17.94	LIVING	p53-like	0.31644	1.32446	0.280676	1.05932	1.11378	0.943241	1.31331	1.52022	1.25382	-2.58812	-0.000464	1.16875	1.06246	1.04107	1.14036	0.556982	1.04588	0.973809	-0.081976	0.041285	-0.274175	-1.03188	-0.332821	-1.0676	-0.71547	0.02473	-0.419582	-0.067667	-1.40191	0.209322	0.507781
	TCGA-FD-A6TA-01	62.81	LIVING	p53-like	0.801512	1.08284	0.461362	0.883254	0.607232	0.743498	0.696419	0.733665	0.95689	0.188345	0.135823	0.878421	0.809511	1.12424	0.751347	0.706096	0.715399	0.778153	7e-05	-0.461714	-0.100321	-0.205899	0.315392	-0.381524	-0.586922	-0.382361	0.401287	-0.721231	-0.328432	0.091252	0.36457
	TCGA-XF-AAMY-01	98.92	LIVING	p53-like	0.67315	1.17819	0.376189	0.855478	0.509162	0.851799	0.784322	0.817604	0.863497	-0.673975	-0.209144	0.733199	0.634979	0.846013	0.990276	0.639535	0.440917	0.656184	0.425395	-0.374289	-1.32537	-0.268302	0.492281	-0.593991	-0.760474	-0.467037	0.303733	0.120482	-0.799854	0.947561	0.342617
	TCGA-FD-A3SJ-01	24.28	DECEASED	p53-like	-1.13002	0.203228	0.555912	1.12963	0.812693	1.10903	0.577868	0.72767	0.914254	0.210348	0.212421	1.77	1.65858	1.95756	1.53776	1.69005	0.687528	1.35611	1.86967	-0.058276	-0.841066	0.292619	-0.19314	-0.56812	-0.749465	-0.612208	-1.23421	-0.845587	-1.41639	-0.256094	0.466272
	TCGA-ZF-A9R1-01	25.39	LIVING	p53-like	0.329324	1.03445	0.828463	0.767148	0.606746	0.590074	0.696267	0.524023	0.389562	1.01143	-0.068839	1.17629	1.23949	1.53967	1.26991	0.970329	0.909378	1.07845	0.037309	-0.077273	0.066761	0.158511	-0.439787	0.619735	0.180834	0.100986	-0.312836	-0.456902	-0.503841	0.564904	0.638174
	TCGA-CU-A0YO-01	4.89	DECEASED	p53-like	0.011575	1.02003	0.450195	0.548527	0.207334	0.380152	0.776245	0.346319	0.984979	1.4186	1.21538	1.60815	1.54892	1.86033	1.52937	1.56501	1.05457	1.26498	0.473168	0.671744	0.507028	-0.463004	-0.885952	1.00378	-0.032545	-0.252997	0.625421	0.440261	-0.479812	0.638204	0.39175
	TCGA-FD-A43S-01	14.95	LIVING	p53-like	0.17427	0.471595	0.168119	0.301624	0.196102	0.125245	1.20191	0.560451	1.07915	1.36995	1.1466	1.23508	1.52185	1.49477	1.40922	1.12138	1.93101	1.22441	1.22879	0.433238	0.104085	-0.383505	-0.759054	0.342564	0.398085	0.177694	0.581202	-0.685595	-0.493771	0.089766	-0.186264
	TCGA-GC-A3OO-01	15.8	LIVING	p53-like	-0.206783	0.555432	0.534104	0.822021	0.03644	0.225393	0.331528	0.456665	0.907244	0.407069	-0.122502	1.63719	1.75294	1.96668	1.5434	1.67476	1.29754	1.29315	0.301946	0.441901	0.405644	0.423248	-0.08063	-0.597277	-0.505566	0.248882	0.587958	0.11655	0.282996	0.430904	0.059923
	TCGA-K4-A3WU-01	3.45	LIVING	p53-like	0.741052	0.919392	0.435837	1.06124	0.167757	0.287925	1.24327	1.32921	1.20261	0.036068	1.3677	1.86092	1.72091	1.90179	0.59567	1.65704	1.53616	1.03953	0.872501	-0.024013	-0.157407	-0.277516	0.414154	0.147321	0.040957	0.546507	-0.744559	0.211646	0.656885	0.27349	-0.08779
	TCGA-GU-A767-01	4.73	DECEASED	p53-like	0.45181	0.966286	0.472271	1.06882	0.757013	1.01426	0.945858	1.0793	1.41759	0.915942	0.904082	1.63597	1.77933	1.69798	1.6772	1.37588	1.17694	1.35768	0.601941	0.402528	-1.10337	-0.052816	0.742497	-0.36277	-0.196997	-0.632638	-1.14028	-0.279774	-0.8476	0.426917	0.171182
	TCGA-K4-AAQO-01	11.79	LIVING	p53-like	0.214588	1.11187	0.470734	0.979456	0.567279	0.458164	0.878591	0.928057	1.22059	0.31497	0.866744	2.15396	2.30458	2.63414	1.88713	2.19538	1.6308	1.48355	0.835636	1.25426	-0.205793	-0.776047	0.841189	-0.469745	-0.156775	-0.382591	-1.03682	-0.592529	-0.416229	0.900762	0.323836
	TCGA-XF-A9SU-01	5.98	DECEASED	p53-like	0.824827	1.25547	0.319327	0.885457	0.445512	0.665423	1.0046	0.63582	0.763495	0.525878	-0.533136	1.5353	1.46165	1.34142	1.4569	1.25112	0.862855	1.25987	-0.117361	0.283232	0.199293	0.280944	1.39615	-0.82665	-0.33261	0.23792	-0.779559	-0.316812	-0.605776	0.503156	-0.004728
	TCGA-FD-A3SL-01	23.39	DECEASED	p53-like	0.761451	1.37061	0.65944	1.08336	0.254541	0.816665	0.636389	1.04167	1.22395	-0.89132	0.279114	1.75343	1.82908	2.08108	1.52608	1.75463	1.5988	1.37558	-0.294202	0.024889	-0.4968	-1.14112	-0.305481	-1.5994	-1.79495	-0.815221	-1.04931	-1.71549	-1.41714	-0.652229	-1.99177
	TCGA-K4-A3WS-01	25	LIVING	p53-like	-0.016452	0.789283	0.323298	0.740711	0.429115	-0.009942	0.603714	0.854758	1.00813	-0.523322	-0.082743	1.52604	1.63393	1.84471	1.51445	1.43702	1.51735	1.27455	0.508947	0.423977	0.216041	-0.519393	-0.627537	-0.102217	-0.115322	-0.189103	-0.42209	-0.061986	-0.405947	0.355847	0.038618
	TCGA-FD-A6TG-01	3.06	DECEASED	p53-like	-0.327651	0.501419	-0.319743	0.885908	-0.385984	0.890457	0.789989	1.09791	0.489534	-0.588228	0.228452	1.56559	1.74737	2.20001	1.4725	1.73896	1.402	1.32204	0.292935	0.047796	0.36287	-0.492796	-0.609489	-1.29141	-1.35389	-0.493138	0.342838	-1.26061	-1.25343	-0.096793	0.090548
	TCGA-K4-A83P-01	16.26	LIVING	p53-like	0.328162	0.676846	-0.064285	-0.373307	0.457884	0.333391	0.594496	0.724373	0.663073	0.635508	1.09	1.49142	1.57548	1.9715	1.50683	1.58223	1.82416	1.20551	0.288282	-0.458573	0.104552	-0.791006	-1.12245	-0.451922	-1.39488	-0.692274	-0.892776	-0.793617	-0.930203	-0.978868	-0.731949
	TCGA-SY-A9G0-01	33.11	DECEASED	p53-like	-1.17474	0.545733	0.055935	0.80833	0.276891	0.22063	0.374867	0.210854	0.990371	0.545167	0.669501	1.78935	1.94451	2.2537	1.83971	1.87184	1.86581	1.51289	1.0189	-0.715925	-0.069474	-0.54644	-0.915647	-0.588359	-0.767658	-0.747005	-0.586097	-0.717668	-0.700921	-0.809701	-0.138579
	TCGA-ZF-AA5P-01	12.22	LIVING	p53-like	0.108064	0.230358	0.274581	0.88985	-0.042952	0.701429	1.0491	0.394136	0.620785	-0.276168	0.802058	2.70562	2.65547	2.68411	2.13028	2.61387	2.16904	1.7746	0.304353	-0.129494	0.310421	-1.66634	-0.608427	-1.07759	-0.952891	-0.3168	-1.40668	-0.204969	-1.11343	-1.08856	0.017136
	TCGA-XF-A9SL-01	66.36	DECEASED	p53-like	0.465606	1.05807	0.034623	0.684103	-0.598726	0.235251	1.12001	0.995784	0.843094	0.561688	0.659693	2.38141	2.40321	2.47284	2.00707	2.03775	1.84998	1.63226	0.636981	-0.20088	-0.1239	-1.74416	-0.881676	-0.375449	-0.837684	-0.793536	0.122064	-0.98588	-1.10947	-0.565755	-1.81243
	TCGA-XF-A9SW-01	11.89	DECEASED	p53-like	-0.146305	0.665577	-0.265733	-0.981563	0.120347	-0.171598	0.399202	0.16926	-0.285191	-0.083542	0.634471	2.68863	2.54621	2.54597	1.95788	2.26548	2.0028	1.85614	1.00812	-0.011897	0.235107	-1.83155	-0.802735	-0.950364	-1.0483	-2.03862	0.19585	0.357782	-0.616553	-0.950383	-1.70065
	TCGA-UY-A8OD-01	112.75	LIVING	p53-like	1.38286	1.08601	0.741163	0.425996	0.766235	0.25724	0.973282	0.06549	1.01296	-0.359363	0.366367	1.68012	1.84625	2.05668	1.7808	1.36178	1.49357	1.28703	-0.196628	0.198078	-0.460667	-1.71526	-1.71951	-1.97237	-1.91393	-0.13227	0.348424	-0.352994	-0.250233	-0.661239	-1.12616
	TCGA-R3-A69X-01	14.22	LIVING	p53-like	-0.00976	0.95057	0.409895	-0.783882	0.237943	0.262474	0.851474	0.419964	0.853558	1.06451	-0.179105	1.3358	1.47615	1.7282	1.39617	1.52387	0.566731	1.21642	0.325845	0.093282	-0.03646	-0.194662	-0.955294	-0.167336	-1.37395	-0.624795	-0.726218	-0.482793	-0.684928	-0.402146	0.227254
	TCGA-4Z-AA7N-01	44.91	DECEASED	p53-like	-0.815211	-0.166171	0.290913	-0.732083	0.098904	0.106866	0.279345	0.41561	0.832456	1.08546	1.25621	1.32739	1.39593	1.49674	1.36116	1.49984	1.63219	0.750182	0.211178	0.311365	0.259712	-0.422404	-0.121631	-0.07775	-0.35879	0.157879	-0.585483	-0.358475	-0.143411	0.092961	-0.185277
	TCGA-XF-AAMR-01	91.66	LIVING	p53-like	-1.47156	-0.083772	-0.024952	0.73911	0.224925	-0.169534	0.251991	-0.25676	-0.014223	0.106013	0.673942	2.27155	2.2879	2.73894	2.1446	2.45818	1.36329	1.60219	0.492758	0.079119	0.0073	0.54022	-0.898736	0.619808	-0.335909	-0.166911	0.491578	0.01057	-0.973025	0.474876	0.006476
	TCGA-XF-A9SP-01	14.91	DECEASED	p53-like	-0.160447	0.641542	0.389343	0.537566	0.646116	0.174864	1.01403	0.511227	0.285215	0.371413	0.421292	1.78625	1.72877	1.86425	1.36726	1.58012	1.56598	1.28557	0.655496	-2.26859	-0.196204	-0.567453	-0.085734	0.048959	0.099627	-0.225576	-0.008095	-0.345596	-0.759761	-1.49781	-0.049593
	TCGA-FD-A5C0-01	18.07	DECEASED	p53-like	0.376709	0.489177	0.137846	0.156819	0.407738	0.173872	0.669524	0.585863	0.681526	-0.783574	0.249452	1.35035	1.5165	1.67934	1.43942	1.21966	0.8991	1.23989	-0.603406	0.730583	0.455188	0.287534	-1.24172	0.332616	-0.12154	0.046983	-0.875556	-0.024975	0.035462	0.760327	0.589961
	TCGA-ZF-A9R0-01	22.34	DECEASED	p53-like	0.656896	1.22311	0.46113	-0.436436	0.916149	0.511294	1.50812	1.44831	1.49422	0.649136	-0.388984	1.74331	1.51773	1.57334	1.65193	1.31641	1.30494	1.1462	-1.41968	-2.26859	-1.10241	-1.7985	-0.751542	-0.734981	-0.965712	-0.719068	-0.296709	-0.816689	-0.534926	-0.653195	0.380907
	TCGA-FD-A6TB-01	18.79	LIVING	p53-like	-0.149048	0.377064	0.112548	-1.04588	-0.11484	0.084762	0.460134	-0.155997	-0.577363	-0.261401	-0.152588	1.28578	1.38232	1.39969	1.29052	1.34935	1.03414	1.04713	0.758949	-0.656739	0.086637	0.937065	-1.31922	-0.54033	-0.362415	-0.168268	-0.278932	0.37638	-0.147844	-1.26406	-0.034186
	TCGA-FD-A3SQ-01	46.75	DECEASED	p53-like	-1.07997	0.224875	0.042903	-1.30738	0.304304	-0.082896	0.809022	0.065827	0.536886	0.616021	0.652138	1.39226	1.30587	1.62421	1.08089	1.20705	1.39289	0.967299	1.08634	0.336704	-0.062683	0.426936	-0.721479	0.74537	-0.56705	-0.692797	0.818494	0.098207	-0.045392	-0.566722	0.263397
	TCGA-DK-A3IT-01	21.29	LIVING	p53-like	0.898505	1.29479	0.231034	0.695661	0.024054	0.252647	1.04903	0.776212	0.400734	-0.657838	0.076706	1.08111	1.15899	1.50164	1.02549	1.09736	0.575495	0.96593	-0.932686	0.45164	-0.721079	-0.776863	0.584683	-1.29965	-0.50151	-2.03862	1.11118	-0.645265	0.061244	0.913123	0.072786
	TCGA-S5-A6DX-01	1.84	DECEASED	p53-like	2.37708	0.793846	-0.392078	0.779379	0.320723	0.500372	1.87069	1.31869	0.461619	0.925236	0.344854	0.919069	1.17532	0.701014	0.854596	0.638421	0.609689	0.97959	-0.263277	0.915646	0.541776	-1.06653	1.66481	-1.58323	-0.913653	-0.159272	-0.389039	0.200435	-0.017549	0.404898	-0.092728
	TCGA-CF-A9FL-01	18.56	DECEASED	p53-like	0.674742	0.925469	0.758636	1.0363	0.706943	0.780976	1.6138	0.743686	0.686402	-0.746796	-0.057591	0.535185	0.568805	0.833056	0.916308	0.338901	0.541479	0.66594	-0.907921	-0.301439	0.375532	-0.055541	-0.262917	0.1209	0.082507	0.2943	-0.046083	-1.43108	-0.415849	0.904042	0.475584
	TCGA-KQ-A41P-01	35.94	LIVING	p53-like	0.027496	-0.275092	0.50139	0.877101	0.67917	0.918277	0.770115	0.653463	0.41249	0.039778	-0.332115	0.449603	0.481915	0.361079	0.660213	0.264442	0.288308	0.622921	-0.485029	0.239102	-1.01642	-0.233963	-0.610642	-0.915831	0.116589	-0.548846	-0.659416	0.389399	0.322421	-1.51161	0.014929
	TCGA-BT-A20R-01	5.06	DECEASED	p53-like	0.384962	0.951143	0.243083	0.668129	-0.152297	-0.057078	0.277702	0.836034	0.929379	-1.05045	-0.579016	-0.202548	0.591477	0.195244	0.327343	0.652378	0.740759	0.047044	0.186543	-2.26859	-0.676784	-0.699155	-1.04198	-0.919066	-0.967626	-2.03862	-0.618669	-1.53764	-0.139495	-0.191508	-3.70233
	TCGA-XF-A9SV-01	12.75	DECEASED	p53-like	1.44363	1.19899	0.614846	-0.989638	-0.294605	0.451787	1.24346	1.20313	1.23576	-0.994349	-2.55859	-0.537027	0.295727	-0.34097	-0.251315	-0.29291	0.561122	-0.302052	-0.49686	-2.26859	-0.035323	-0.565816	-0.3098	-0.658785	-0.36876	-0.086065	-1.66503	-0.428446	-0.098198	-0.821303	0.317797
	TCGA-GC-A6I3-01	13.9	LIVING	p53-like	0.465026	-1.29249	0.1402	0.628428	1.23907	0.812551	0.676609	0.694269	0.863634	-0.342742	-0.539853	0.264048	0.498826	0.134712	0.672608	-0.209362	0.138583	0.599147	0.586065	-2.26859	-0.624176	-0.141156	-0.360926	-0.055939	-0.897906	-0.480559	-0.766353	-0.23603	-0.545732	0.066258	0.175448
	TCGA-FD-A3SM-01	17.97	DECEASED	p53-like	1.08396	-0.033588	0.758706	-0.549477	0.470369	0.221259	1.01452	0.747535	0.539716	-0.923281	-0.707462	0.336949	0.280804	0.377846	0.325836	0.242371	0.249939	0.258256	1.72818	-2.26859	0.799259	1.03827	-1.21908	-1.10601	-0.706196	0.180053	-1.05624	-0.725917	-0.953249	0.561776	0.075482
	TCGA-UY-A78K-01	17.61	DECEASED	p53-like	0.831853	-1.80376	0.27221	1.17459	0.345981	0.850006	0.07855	0.762852	1.36842	-0.943128	-0.096348	-0.230824	-0.007529	-0.014015	0.323745	-0.169579	-0.196808	-0.52947	0.141385	-0.354932	-0.62392	0.289399	-1.01318	-1.74203	-3.4006	-0.607438	0.179113	-0.818315	-0.365521	-0.816594	-2.69386
	TCGA-XF-AAMG-01	110.51	LIVING	p53-like	-0.834327	-2.05438	-0.230998	0.93289	1.03991	1.27483	0.199329	-0.861912	-0.979014	-0.384648	-0.044429	0.356769	0.166201	-0.363568	0.122107	0.297422	-0.213417	-0.491842	1.0576	-0.23359	-0.791699	-0.746889	-0.232304	-1.47761	-1.15772	-0.820238	-0.702837	-1.2107	-0.358494	-0.493433	-1.41841
	TCGA-GV-A3JZ-01	19.81	LIVING	p53-like	0.908386	-1.06269	0.285487	0.951324	1.10746	0.989168	0.544734	0.150298	-0.688942	-0.099399	0.881251	-0.056089	-0.065389	-0.131816	-0.717234	-0.164557	0.284798	0.061702	2.03702	-0.731295	-0.752348	-0.416415	-1.25872	-1.7083	-1.14173	-2.03862	-0.690028	-0.549483	-1.28498	-0.377968	-0.87704
	TCGA-DK-A1AC-01	130.78	LIVING	p53-like	1.70177	-2.6093	-0.521789	0.174391	0.825386	0.736929	0.352185	0.411842	-0.666545	-1.1081	-0.27325	-0.163647	-0.162208	-0.759257	-0.783267	-0.088957	-0.302443	-0.148182	2.57461	-0.889421	-0.752143	-1.48539	-1.75789	-1.04835	-0.831403	-2.03862	-1.08536	-0.796346	-1.70092	-1.34461	-1.13744
	TCGA-FJ-A3Z7-01	31.04	LIVING	p53-like	1.43884	-1.98206	-0.209074	1.10888	1.04663	1.37793	0.012863	0.940132	0.04351	-1.15684	0.873291	0.01216	-0.044198	0.049333	-0.899748	-0.115234	-0.156759	-0.212376	0.590995	-0.302344	-0.983134	-0.774525	-0.664825	-2.18374	-1.93009	-0.770721	-0.943073	-0.655027	-0.561579	-3.12971	-1.18079
	TCGA-FD-A43U-01	20.89	LIVING	p53-like	-0.240496	-1.85937	0.427625	0.514632	0.648148	0.50755	1.06054	0.812374	0.825294	-0.214587	-0.84883	0.53385	0.957533	-0.036092	0.779598	0.44316	0.443167	0.203603	3.56536	0.323034	0.47928	-1.27557	-0.228789	-1.68248	-0.874086	-0.777884	-0.536947	-0.424481	-0.376466	-1.10436	0.314178
	TCGA-GU-AATO-01	10.64	DECEASED	p53-like	1.7349	-1.37617	0.424859	0.411734	0.061747	-0.140297	0.73964	0.876836	0.667081	-2.58812	-0.507106	0.635159	0.68893	0.459553	0.656965	0.027792	0.40109	0.749078	0.279998	-0.061687	-0.461976	0.374236	-0.74978	-1.05728	-0.401743	0.503258	0.585422	1.15153	0.239399	-1.1439	-3.15019
	TCGA-BT-A20Q-01	19.48	DECEASED	p53-like	-0.222307	0.092047	0.483611	-1.26883	0.8464	0.072526	-0.27047	0.47599	-0.14644	0.035478	0.226569	0.983063	0.973363	1.35817	1.07173	0.963752	0.664586	0.915812	0.357472	-0.796574	0.284046	0.591562	-0.472289	0.49481	-0.470659	-2.03862	0.104522	-0.743969	-1.00595	-3.12971	0.569753
	TCGA-5N-A9KM-01	17.41	DECEASED	p53-like	0.834926	0.465966	0.340861	-2.81348	0.843562	0.583495	0.51093	0.45804	0.890513	-0.254252	-0.411613	0.223367	0.116659	0.605797	0.582928	-0.25626	0.05673	0.483864	0.200569	-0.779129	-0.602523	-0.037562	-0.175937	-0.422892	-0.941791	-2.03862	0.332674	-0.790968	-0.476418	-3.12971	0.279426
	TCGA-DK-A3IU-01	23.19	DECEASED	p53-like	1.68839	0.654923	-3.19197	-0.485219	0.472436	-0.138494	-0.858684	-0.277593	-0.709952	-1.07783	-0.043332	1.59565	1.62884	2.0171	1.59358	1.62525	1.10598	1.2299	-0.4577	1.60857	0.369163	-0.251147	1.15205	0.537337	1.24062	0.213276	0.393808	0.172701	1.31876	0.749084	-0.589308
	TCGA-BT-A2LD-01	20.47	DECEASED	p53-like	2.19333	1.04866	-3.03405	-1.01893	1.15175	0.413025	-0.590097	0.497	-0.510113	-1.18015	-0.630788	0.553713	0.58317	0.598636	0.818399	0.790394	0.963105	0.591404	-1.01711	0.268411	-1.37982	-0.071669	0.559463	0.320075	0.812206	-0.072037	-0.538567	0.129521	0.861098	0.861248	-2.55529
	TCGA-FD-A3SS-01	12.84	DECEASED	p53-like	1.12146	0.619877	-0.80357	0.409789	0.521218	-0.19214	0.18869	0.902544	0.398063	-0.843263	-0.478688	0.740059	0.599248	0.547405	1.08757	1.23791	0.916041	0.743369	0.034176	1.76528	-1.31304	-1.01628	-0.116653	0.992442	1.03178	-0.112463	0.553504	0.480967	1.50408	0.932221	-1.31485
	TCGA-FD-A62P-01	6.27	DECEASED	p53-like	0.467265	0.672364	-2.70095	0.125961	-0.117176	0.150859	0.275641	0.727302	-0.952229	-0.965954	-0.619262	0.902925	1.18687	1.04753	1.12984	0.913307	1.09808	0.909018	-0.435478	0.427344	1.3919	-0.13535	-0.731258	1.03517	0.084626	-0.377162	1.445	-0.253452	-0.503124	1.09217	0.18756
	TCGA-FD-A3SN-01	29.14	LIVING	p53-like	0.497093	0.752869	-1.71805	0.552498	0.174845	-0.018603	-0.15757	0.047103	-1.03999	0.662183	-0.552899	0.502209	0.529233	0.482231	0.437884	0.541676	0.564704	0.487691	0.911377	-0.372405	0.969793	1.33416	-0.370809	0.947037	0.521567	0.580919	1.22095	-0.316335	-0.555893	0.43887	0.099805
	TCGA-DK-A1A5-01	2.14	DECEASED	p53-like	0.344204	0.660581	-0.138697	-1.02971	0.553588	0.165553	0.660793	0.049955	-0.235568	-1.00809	-2.55859	1.01554	0.862588	0.7966	0.745057	0.827983	0.679307	0.858098	0.703807	0.120289	0.605016	1.26644	-0.139189	0.572908	-0.001416	0.493193	0.77461	-1.84121	-1.25421	0.791818	0.708881
	TCGA-SY-A9G5-01	38.96	LIVING	p53-like	0.785158	-0.509105	0.162447	-0.997568	0.17212	-0.358182	0.400831	-0.118289	-1.18001	-0.950145	-0.229075	0.992691	0.842417	0.54627	0.662138	0.608317	0.728622	0.67538	0.461081	-0.440639	0.167143	0.531826	0.888396	0.922471	0.480458	-0.273601	1.03697	-0.988426	0.428014	0.598136	0.04766
	TCGA-ZF-AA5H-01	29.47	LIVING	p53-like	0.488397	0.088373	-0.402575	-0.389064	-0.536571	-0.158072	-1.49388	-0.161164	-1.17709	-1.001	-1.0297	0.257675	0.304054	0.149117	0.56477	2.47392	-0.086301	0.366669	1.98457	-0.408902	1.46106	1.55287	0.414417	-0.951491	-0.145588	-0.14787	1.19332	-0.547444	0.312982	0.506211	-1.26304
	TCGA-FD-A6TK-01	10.84	LIVING	p53-like	1.54516	0.89979	-0.748648	-0.038322	-0.560697	-0.459018	-1.30741	-0.439268	-1.74655	-2.58812	0.049873	1.03355	1.06318	1.2131	1.03364	1.26887	0.943872	0.94419	1.83189	-0.229087	1.43167	1.76893	1.1056	0.154673	1.04762	-0.023025	0.613266	-0.558282	-0.832461	0.164978	-0.797875
	TCGA-XF-A9T3-01	2.23	LIVING	p53-like	-0.258408	-0.282519	0.096603	-0.613818	-0.866635	-0.151265	-1.15248	-1.02879	-0.880876	-0.442363	-0.019539	1.88917	1.72116	1.91952	1.66887	2.02058	1.00042	1.40387	1.67697	-0.382155	0.733466	1.25966	0.345709	-1.47327	-0.371426	-2.03862	1.06458	-0.115465	1.21549	-0.272785	-2.13366
	TCGA-DK-A2I4-01	142.67	LIVING	p53-like	0.999521	-0.151721	-0.050135	0.007337	-0.071179	0.362048	-0.43663	-1.15747	-1.1263	-1.02204	-0.396812	0.050298	0.398588	0.576469	0.756117	0.713298	0.320224	0.585431	0.688503	-0.237749	1.05161	0.221112	-0.408469	-1.87602	0.506394	0.19603	1.13946	-0.009403	-0.623052	-0.759459	-2.88002
	TCGA-DK-A3IN-01	8.21	DECEASED	luminal	0.165936	0.873361	0.271808	0.518536	0.383027	1.26492	0.178245	-0.10184	-0.378134	0.135668	-0.627516	0.184453	0.254651	0.049714	0.404885	0.211446	-0.021658	0.221978	-0.913406	-0.271326	0.426338	0.818605	1.28943	0.3063	0.80666	0.99233	-0.361718	1.11462	-0.302763	0.791731	0.353232
	TCGA-C4-A0F6-01	23	LIVING	luminal	-0.596771	0.962408	0.702047	0.856944	0.61263	0.167068	-1.13759	0.925089	1.13491	0.903168	0.726353	0.416658	0.013881	0.058218	-0.442127	0.038706	0.418262	-0.200116	0.312301	1.89004	-1.18525	0.20284	0.956153	0.068295	0.312039	0.270602	0.488257	0.525536	-0.785417	0.739021	0.343796
	TCGA-GC-A3RD-01	14.06	LIVING	luminal	-0.354165	-1.70427	0.474391	0.752905	1.14089	0.877811	0.535772	1.00397	0.899866	0.301581	-0.552325	-0.398401	-0.497909	-0.866818	-0.371167	-0.489078	-0.620201	-0.499849	0.029969	0.971713	-0.069262	0.01987	0.773576	0.307617	0.33204	0.199329	0.889947	0.319435	0.346262	0.384547	0.641429
	TCGA-4Z-AA7O-01	16.82	LIVING	luminal	0.265652	-0.504566	0.621262	0.986023	0.446237	0.876031	0.678513	0.351843	0.916515	-0.303415	0.363201	-0.29619	-0.496226	-0.394224	-0.284407	-0.681287	0.3623	0.237281	-0.282268	1.22354	-0.355497	-0.402182	-0.043914	0.423977	0.644917	0.559384	0.301903	0.817392	-0.800657	0.888156	0.720728
	TCGA-DK-AA71-01	13.63	LIVING	luminal	0.533909	0.705905	0.726021	1.03544	0.360171	0.569897	0.836055	0.729086	0.949364	-0.921217	-0.143602	0.01358	-0.285182	-0.417122	-0.075805	-0.271144	-0.410062	0.15481	-0.657127	1.23638	0.230317	0.31288	0.00049	0.107285	0.598626	0.828675	0.530683	0.57605	-0.243962	0.108269	0.108171
	TCGA-XF-A9T0-01	26.25	LIVING	luminal	0.027137	-1.46016	0.484012	1.12523	0.985624	0.551919	0.902097	0.877587	0.614501	0.908604	-0.082257	0.114488	0.199303	0.029959	0.253862	-0.23379	0.121826	0.11157	-1.17845	0.401402	-0.265574	-0.601252	0.707868	-0.487368	0.489983	-0.267376	-0.695531	-0.268734	-1.06482	0.380896	0.60523
	TCGA-UY-A78M-01	22.67	DECEASED	luminal	-0.596329	0.42196	0.332734	0.940703	0.239877	0.611699	1.2336	0.893381	0.537289	0.204474	-0.88357	0.716022	0.716491	0.087836	0.6515	0.275072	0.101695	0.519326	-0.843516	0.988226	-0.598008	0.144897	1.55388	-0.053615	0.698781	0.840672	0.627723	0.473862	-1.05779	-1.51795	0.112468
	TCGA-GC-A3RB-01	19.12	LIVING	luminal	-0.653774	-1.41958	0.41795	0.698171	0.749902	0.733719	-0.439439	-0.042838	-0.573845	0.981227	1.1101	-0.87627	-1.12182	-0.656962	-0.432408	-0.638761	-0.636031	-0.594756	0.535295	0.408167	0.021521	0.716097	-0.188785	-0.597957	0.153161	0.061779	-0.324342	-0.207222	-0.678406	0.594653	0.547755
	TCGA-UY-A9PH-01	51.28	LIVING	luminal	1.34742	1.03703	0.472161	0.911697	0.551023	0.740971	0.336232	0.861658	0.815938	-0.474895	0.3883	-0.412349	-0.299813	-0.734083	-0.583303	-0.380432	0.111159	-2.16784	-1.80182	0.867174	0.14785	-0.832814	-0.280803	-0.380781	-0.032729	0.13136	-0.076099	-0.526185	-1.11329	0.326049	0.280004
	TCGA-BT-A3PH-01	4.66	DECEASED	luminal	1.19147	1.31916	0.410591	1.17094	0.313587	0.236637	0.794538	1.15417	0.785687	0.139463	1.03555	-0.181544	-0.250118	-0.605677	-0.629764	1e-05	0.062787	-0.557058	-0.90277	-0.687902	0.196052	-1.88593	0.074906	-1.04216	-0.794906	-0.517606	0.201265	-0.323343	-0.141148	-1.06183	0.251209
	TCGA-DK-A1A6-06	66.36	LIVING	luminal	1.5968	1.17195	0.578715	-0.312956	-1.87735	0.575538	-0.474155	0.611229	-0.109139	-0.889848	-0.257375	-0.126241	-0.53601	-0.760487	-0.714558	-0.674726	-0.372516	-2.16784	-1.08203	-2.26859	-1.25761	-1.85379	-0.928649	-1.61015	-1.27122	-0.203751	-0.742445	-0.467733	-1.12839	-1.09146	0.13144
	TCGA-CU-A0YR-01	15.11	DECEASED	luminal	1.0588	1.23821	0.260587	1.16361	-2.75575	1.11552	1.01848	1.01995	-0.034068	0.309516	1.05033	-0.38753	-0.208252	-0.067927	0.183728	-0.133864	-0.00932	-0.447901	0.067321	-0.375185	-0.427143	-1.40238	0.674976	-0.691093	-0.02185	-0.083139	-0.495417	-0.227077	-0.877489	-0.665848	-0.576311
	TCGA-E7-A541-01	25.56	DECEASED	luminal	-0.353025	-1.368	0.29556	-0.294885	0.375304	0.290138	-0.225532	0.793564	1.04482	0.660033	0.897833	-0.506842	-0.624511	-0.415001	-0.460739	-0.443184	-0.062635	0.022042	0.368566	-0.039949	-0.48685	0.239279	-0.235997	-0.422947	-0.81957	-0.803474	0.498064	-0.396253	-0.008957	0.002076	-0.265015
	TCGA-DK-A6AV-01	64.13	LIVING	luminal	1.11492	-1.0987	0.503797	0.388286	0.608164	0.42112	0.705867	0.602345	0.835492	0.520978	0.984543	-0.740304	-0.666927	-0.440051	-0.330794	-0.852745	-0.017849	-0.582304	0.639299	-0.716116	0.484446	1.30904	-0.151852	0.511379	-0.953372	-0.747161	0.704974	-0.479125	-1.46128	0.013099	0.549273
	TCGA-GU-A763-01	32.75	LIVING	luminal	0.508987	0.452118	0.747249	0.888743	0.753913	0.996327	-0.26126	0.65987	0.873856	0.317606	-0.229182	-0.560388	-0.586805	-0.846874	-0.32447	-0.532172	-1.07319	0.004952	-1.88123	-0.05908	-0.734783	-0.384911	-0.835941	0.689058	-0.002498	-0.395273	-1.12071	-1.22961	-0.54521	0.72162	0.452306
	TCGA-CF-A8HX-01	11.33	LIVING	luminal	0.216715	-0.507862	0.239795	-1.1098	0.893934	0.312449	0.613977	0.301272	0.523007	0.854119	1.02199	-0.193032	-0.214723	-0.450036	-2.58277	-0.827287	-0.265474	-0.053334	-0.220032	0.188275	0.605642	0.104419	-1.00441	-0.883786	-1.38211	-0.757504	-1.47492	-0.57373	-0.072305	-1.25654	0.617191
	TCGA-DK-A6B2-01	15.67	LIVING	luminal	0.698781	1.20696	-0.280658	0.524684	0.163988	0.705484	0.835859	0.836438	1.06308	-1.05789	-0.724635	-0.17589	0.22411	0.013529	-0.347689	-0.016053	0.351462	-0.300176	-0.044146	-0.842742	-0.181094	0.10507	-0.178074	-1.28065	-1.4959	-2.03862	-1.25442	-1.54567	-0.575812	0.108337	0.222216
	TCGA-ZF-AA4T-01	19.68	DECEASED	luminal	0.01163	-0.160543	0.198689	0.724508	1.0409	0.768417	0.545699	0.69794	0.394903	-0.992703	-0.649917	-0.819181	-0.685831	-1.02358	-0.356765	-0.527507	-0.940072	-0.371423	-1.20562	-0.78214	0.126325	-1.19668	-1.29645	-2.79445	-1.96713	-2.03862	-1.29016	-1.34638	-0.320241	-0.227867	0.392671
	TCGA-2F-A9KW-01	8.34	DECEASED	luminal	1.93975	0.835785	-0.418071	0.914489	0.566533	0.856415	0.046168	0.417716	-0.859856	-0.543318	0.913444	-0.253729	-0.378737	-0.063363	-0.560127	-0.167438	-0.283297	-0.241909	-0.51254	-0.587459	-1.29577	-1.05759	-0.920032	-1.17054	-0.892715	-2.03862	-1.49923	-0.330087	-0.176456	0.416722	-0.620486
	TCGA-KQ-A41R-01	44.35	LIVING	luminal	1.94169	0.763052	0.608843	1.27185	0.657094	1.08576	1.23473	1.06425	1.2453	-0.498096	0.680338	-0.603843	-0.476222	-0.232765	-0.144239	-0.60848	-0.424418	-2.16784	-0.49704	-0.243161	-1.49801	-0.520589	-0.919292	-1.79889	-1.81054	-2.03862	-1.1365	-0.894153	0.496288	-0.131413	0.227869
	TCGA-FD-A43P-01	27.33	LIVING	luminal	0.078711	0.930979	0.682714	0.896252	0.81332	0.492428	0.612459	0.894837	1.09254	-0.522009	-0.677673	-0.549547	-0.750851	-0.813527	-0.195493	-0.743676	0.289749	0.180186	-0.124988	-0.190525	-0.554355	-0.775191	-1.01612	-0.732248	-1.61097	-0.122973	-0.754622	-0.677328	-1.48276	0.323834	0.117245
	TCGA-4Z-AA87-01	47.77	LIVING	luminal	1.819	1.07201	0.459344	1.27964	1.03961	1.01228	0.532789	0.618464	1.28863	-0.914588	-2.55859	0.062219	0.041077	-0.151872	0.32903	-0.34592	-0.769228	0.237188	0.181771	-2.26859	-1.85403	-0.75435	-0.426042	-1.22819	-0.989964	-0.585657	-1.11912	-0.233699	-1.29875	-1.47499	0.022858
	TCGA-KQ-A41Q-01	46.94	LIVING	luminal	0.61499	0.644693	0.505312	0.847022	1.42909	0.849415	0.656939	0.812365	0.595485	-2.58812	-2.55859	0.081486	-0.076892	-0.811724	-0.571559	-0.848068	-0.880066	-0.035927	0.216405	-0.216493	-1.42638	-0.920669	-0.549308	-1.01948	-1.01694	-0.650301	-1.30211	-0.600268	-0.694272	-1.84695	0.630819
	TCGA-XF-AAMX-01	6.77	DECEASED	luminal	0.287492	0.590223	0.698688	0.888226	0.594338	0.485272	0.432146	1.17979	0.605349	-0.980032	-2.55859	0.012361	-0.175018	-0.478699	0.258587	-0.436472	0.399596	0.065806	0.506226	-0.468499	-0.483175	-1.53281	-0.585428	-1.12881	-0.509737	-0.479374	0.555645	-0.983172	-0.205263	-3.12971	0.518627
	TCGA-E7-A85H-01	12.94	LIVING	luminal	0.210068	1.23874	0.56643	1.066	0.869926	0.678604	1.1205	0.980975	0.181527	-0.699816	0.103392	-8.2e-05	-0.132174	-0.137059	0.352859	-0.166227	-0.113234	0.195164	-0.238048	-0.853841	-0.95421	-1.28914	-0.676756	-0.806137	-0.914238	-0.704198	-0.904163	-0.781522	-0.97781	-1.34566	0.464167
	TCGA-GV-A3JW-01	21.32	LIVING	luminal	-0.771456	-1.57763	0.804096	1.01663	0.930195	1.00197	0.302857	0.948438	0.766789	0.963818	0.626431	-0.770301	-0.662128	-0.227745	-0.298373	-0.763063	-0.068526	-0.064135	-0.416322	1.05565	-1.35582	-0.78737	-0.746517	0.220549	-0.021101	-0.245549	-1.67231	-0.064092	-0.601364	0.808194	0.648242
	TCGA-FD-A43X-01	3.61	LIVING	luminal	0.078762	-1.55714	0.566975	0.659126	0.51139	0.743889	0.030084	0.468271	0.725657	1.45684	0.640165	-0.790295	-0.580225	-0.428533	-0.526469	-1.25066	-0.831666	0.073337	-0.436723	-0.273333	0.140157	-0.746076	0.094892	-0.198346	-0.229542	-0.605465	-1.22598	-0.952607	-0.299615	0.473821	0.555781
	TCGA-ZF-A9R5-01	35.81	LIVING	luminal	-0.683042	-1.58388	0.928497	-0.281696	0.828549	0.780316	0.047973	0.162333	0.583572	1.40311	0.908751	-1.46449	-1.99147	-0.779076	-0.640787	-2.64113	-0.536224	-2.16784	-0.505031	-0.809234	-1.34399	-0.69738	-0.884336	0.855155	-0.315105	-0.107106	-0.633777	-0.936739	-0.415872	0.616554	0.745477
	TCGA-XF-AAN1-01	30.91	DECEASED	luminal	0.355229	0.294247	0.715946	0.251381	0.58428	0.732861	0.204648	0.483258	0.762342	1.06682	0.695561	-0.156268	-0.353265	-0.119663	-0.837286	-0.583227	-0.507866	-0.556798	0.639738	-0.385541	0.309604	-0.049477	-0.530426	-0.088173	-0.680918	-0.204644	-0.432869	-0.420616	-0.507374	-0.568756	0.450997
	TCGA-E7-A5KF-01	0.66	LIVING	luminal	-0.430165	-1.71842	1.05618	-0.444175	1.00132	1.08383	0.203406	0.63549	0.207133	1.20723	0.248242	-1.45038	-1.71101	-1.41224	-2.58277	-0.8542	-2.04249	-0.30484	0.94984	-2.26859	-0.198096	-0.729113	-1.14002	0.52499	-0.530901	-0.295395	0.040523	-1.77207	-0.301348	-0.380139	0.893078
	TCGA-CF-A3MH-01	13.07	LIVING	luminal	1.41449	0.531343	0.59455	-0.291986	0.398837	0.652033	0.8785	0.718318	1.05847	0.681739	0.637567	-0.916763	-1.1331	-0.702008	-2.58277	-1.37268	-1.07148	0.133272	0.595246	-0.831982	0.454433	0.5913	-0.446985	0.360864	-0.326233	-0.190761	1.29661	-1.09217	-0.063806	0.498749	0.48844
	TCGA-CF-A47S-01	10.94	LIVING	luminal	0.700009	0.243363	0.504016	-0.296085	0.794286	0.82975	0.934244	0.811066	0.628424	1.21507	0.79595	-0.854174	-0.753023	-0.538622	-2.58277	-0.970114	-0.605228	-0.053093	0.179524	-2.26859	0.080928	0.125806	-0.593222	-0.549132	-0.992224	-0.957929	0.445627	-0.212144	-0.25873	-0.816562	0.48359
	TCGA-CF-A47V-01	12.45	LIVING	luminal	0.200143	0.160263	0.568313	-0.838692	0.882291	0.69326	0.819604	0.58277	0.247001	1.15001	1.01516	-0.526908	-0.736568	-0.058245	-2.58277	-1.18437	0.083262	0.109996	0.819612	0.005894	0.133972	-0.228248	-0.272239	0.448273	-0.71051	-0.819193	0.245214	-1.20922	0.120478	-0.354903	0.729231
	TCGA-E7-A6MF-01	24.64	LIVING	luminal	-0.732873	-0.315119	0.773082	-1.4704	0.039151	-0.409281	0.392333	-0.452411	0.351275	1.43322	0.867447	-2.1055	-1.73152	-1.20705	-2.58277	-1.70855	-1.26052	-0.247211	0.215403	-0.833691	0.895845	0.328093	-1.78555	0.52369	-0.672492	-0.843532	-0.168754	-1.05668	-0.383333	1.13247	1.17108
	TCGA-XF-AAMQ-01	71.52	LIVING	luminal	-0.338936	0.628539	0.968409	0.471028	0.387048	0.522873	0.099407	0.269375	0.440714	1.18407	1.22615	-0.876272	-0.973009	-0.67274	-1.14681	-0.909239	-0.076235	-0.640885	0.427979	-0.148334	-0.072911	0.003444	-1.23453	-0.621687	-0.090727	-0.022954	0.38128	0.345025	-0.757693	0.35317	0.853009
	TCGA-E7-A8O7-01	15.31	LIVING	luminal	-0.03292	0.226318	0.685957	-0.649675	0.640175	0.641644	0.693932	0.503782	0.409024	1.28571	1.13009	-1.45196	-1.4337	-0.486499	-1.27553	-0.832025	-0.138313	0.044146	0.674376	-0.900139	0.376205	-0.09227	-0.917813	0.069327	-1.36357	-0.650981	0.644179	0.605269	-0.557683	-0.088619	0.670404
	TCGA-CF-A9FM-01	13.07	LIVING	luminal	-0.864575	0.368288	0.699575	-0.781799	0.71786	0.623236	0.087965	0.31929	0.287486	1.20336	1.15694	-1.05791	-1.12399	-0.714283	-1.16817	-0.715059	-0.160691	0.052183	0.604935	-0.80122	0.640242	0.239626	-1.31933	0.141867	-0.875457	-0.569601	0.440001	0.043918	-0.427504	0.559363	0.790899
	TCGA-CF-A5U8-01	13.11	LIVING	luminal	0.444239	0.531713	0.616107	0.650512	1.03473	0.926093	0.766358	1.10256	1.15172	1.35753	0.91176	-0.76787	-0.739985	-0.63523	-1.12397	-0.770591	0.407441	0.008621	-0.859308	-2.26859	-0.138476	-0.627674	-0.829808	0.818548	-0.176772	-2.03862	-1.0935	-1.22979	-0.452888	0.338859	0.630457
	TCGA-E7-A7DU-01	0.92	LIVING	luminal	0.631557	0.639071	0.633538	0.850456	0.971796	0.915887	0.182507	0.929633	0.950013	1.38479	1.02279	-0.739533	-0.606844	-0.345918	-0.753975	-1.13433	-0.178184	0.610085	-0.438966	-2.26859	-0.532576	-0.462082	-0.232174	0.062399	-0.102563	-2.03862	-0.655735	-0.927802	-0.860785	0.169609	0.590333
	TCGA-CF-A47W-01	12.09	LIVING	luminal	0.473111	0.400814	0.531236	0.182376	0.885993	0.724797	0.015118	0.644234	0.17433	1.40638	0.83103	-0.264018	-0.339392	-0.313441	-1.15531	-1.30774	0.018253	-0.377914	-0.327083	-0.78938	-0.267437	0.275683	-1.35335	0.359392	-0.685855	-2.03862	-1.18457	-1.13425	-0.357213	0.166529	0.710058
	TCGA-CF-A3MG-01	12.12	LIVING	luminal	1.06038	0.738186	0.780196	0.142874	0.737482	0.74953	1.02699	0.950404	1.09342	0.72173	0.423183	-1.2516	-1.04594	-1.14212	-0.723625	-2.00658	-1.71199	0.014974	-1.01664	-2.26859	-0.057308	0.249709	-0.841799	-0.040549	-0.763419	-0.638417	0.417028	-1.46566	-0.754396	0.087002	0.501098
	TCGA-DK-A6B0-01	76.54	LIVING	luminal	0.161408	0.123457	0.66261	-0.854431	0.735674	0.721982	0.283107	0.330369	0.499989	1.34009	0.643911	-0.988305	-0.914739	-0.818543	-0.568094	-1.3935	-1.44174	0.151148	-0.470644	-2.26859	-0.21496	0.263554	-1.05467	0.025154	-0.587254	-0.586431	-0.590983	-0.840365	-0.253088	0.337861	0.546397
	TCGA-E7-A678-01	26.22	LIVING	luminal	-0.265946	0.868385	0.824649	0.0158	1.01578	0.850036	0.080049	0.48999	0.298372	1.54011	0.665706	-0.98618	-1.01418	-0.86985	-1.04605	-1.61465	-0.239144	-0.557931	-0.833293	-2.26859	0.052081	0.052199	-1.41266	0.594954	-0.793233	-0.724837	-1.26217	-1.58772	-0.640524	0.832199	0.697614
	TCGA-4Z-AA7S-01	34.95	DECEASED	luminal	0.335261	0.431228	0.819368	0.716623	0.662638	0.684215	0.777489	0.06023	-0.66322	0.557486	0.850103	-0.181088	-0.2765	-0.124494	-0.321144	-0.464239	0.07909	0.021739	-0.32514	-0.612572	-0.081969	0.423714	-1.1086	-1.10333	-1.15531	-0.662301	-0.658323	-1.49938	-0.585245	-1.86249	0.32115
	TCGA-XF-A8HG-01	15.34	DECEASED	luminal	-1.19081	0.879265	0.585779	1.25782	1.35628	1.18425	0.729503	0.861761	1.00321	0.203396	0.298567	-1.1394	-1.24459	-1.2582	-2.58277	-1.69961	-0.667129	-2.16784	0.323039	-2.26859	-1.19832	0.543694	-0.05773	-1.54197	-3.4006	-2.03862	-2.4967	-3.87677	-0.322339	-3.12971	0.984028
	TCGA-GV-A3JV-01	14.26	DECEASED	luminal	0.665121	0.959767	0.355492	1.01185	0.467208	1.92107	0.552723	0.404304	0.570868	1.23197	1.24154	-0.439615	-0.34127	-0.126323	0.106875	-0.385379	0.578949	-0.337152	0.454877	-2.26859	-0.547252	-0.626003	0.544928	-2.21609	-1.46827	-2.03862	-1.01595	-1.81383	-0.172646	-1.7464	0.346934
	TCGA-2F-A9KQ-01	94.81	LIVING	luminal	0.198613	0.895135	0.717088	1.05951	0.346786	0.14056	1.00916	0.82112	0.220322	0.518398	1.15257	-0.527508	-0.439484	-0.18598	-0.140722	-0.682569	-0.388948	-0.31929	-0.233313	-0.097507	0.439898	0.53468	-0.039818	-1.41613	-1.33238	-0.818285	-1.28781	-0.783149	-0.805387	0.267521	0.379946
	TCGA-2F-A9KP-01	11.96	DECEASED	luminal	0.138339	0.153978	0.481539	1.07517	0.382207	0.716864	1.00232	0.881838	0.958003	1.12149	0.779432	-0.620319	-0.533866	-0.392983	-0.797174	-0.087051	0.014929	-0.215883	-0.523105	0.485395	-0.088274	0.215435	-0.251233	-0.173159	-1.03835	-0.849546	-1.18786	-1.76406	-0.776609	-0.251744	0.488787
	TCGA-LT-A5Z6-01	15.57	LIVING	luminal	-0.372488	0.45943	0.575108	0.7115	0.786466	0.497976	1.20313	1.19927	1.1439	-0.356665	-0.156462	-1.30434	-1.26815	-0.961897	-0.746876	-0.848338	-1.17204	0.057726	0.408721	0.824472	-1.40695	-0.810689	-0.743076	-1.9727	-0.625989	-0.201492	-1.04126	0.419356	-0.167616	0.036705	-0.735647
	TCGA-DK-A6B6-01	36.63	LIVING	luminal	-0.869405	0.2943	0.859548	0.945914	0.957336	0.740919	1.15806	0.72069	1.14519	1.03598	0.446404	-1.81886	-1.92031	-1.27727	-2.58277	-2.77536	-0.754806	-2.16784	0.795436	-0.736497	-1.13292	-0.731097	-1.80233	-1.98151	-1.07632	-2.03862	-0.709076	-0.803303	-0.730947	-0.820697	0.536844
	TCGA-G2-AA3B-01	65.97	LIVING	luminal	0.67007	0.325833	0.844416	1.05402	0.674593	1.36022	1.02798	0.798035	1.04088	1.13399	0.224578	-1.61624	-1.59283	-1.11393	-1.23963	-2.2775	-1.50375	-0.547245	-0.803967	-0.676934	-2.38716	-0.557327	-0.171641	-0.633248	-0.212762	0.176226	-0.964674	-0.322873	-0.055294	-0.269108	0.452923
	TCGA-GV-A3QK-01	27.33	LIVING	luminal	0.484336	0.570535	1.03946	1.01713	0.715938	0.680841	1.39407	0.89248	1.02056	1.01644	0.968816	-1.6056	-1.51626	-0.876305	-2.58277	-1.64682	-0.75596	-0.042792	0.513536	-0.684633	-0.858967	-0.47874	-0.554736	-0.718245	-0.805274	-0.514923	-0.607667	-0.495396	-0.736407	0.044879	0.515018
	TCGA-ZF-AA4X-01	67.15	LIVING	luminal	-0.265966	0.717157	0.729799	1.03214	0.633989	0.44051	0.906062	0.82936	1.05702	0.580422	0.689922	-1.9389	-1.56404	-1.06089	-0.901273	-1.25347	-1.05148	0.150853	0.438071	-0.41534	-1.73327	-0.936869	-1.00139	-0.599399	-0.296286	-0.176927	0.111399	-0.652069	0.115285	0.406143	0.109331
	TCGA-DK-A3IV-01	9.66	DECEASED	luminal	-0.386084	0.360911	0.843211	0.814189	0.444313	0.353891	0.729448	0.622686	0.532339	0.233361	0.644082	-1.72647	-1.56855	-0.630553	-1.32798	-1.62664	-0.330167	0.171125	-0.201337	-0.647405	-0.872297	-0.649811	-1.66935	-0.088523	-0.793513	-0.443246	-0.199855	0.330883	-0.313865	0.056251	-0.239697
	TCGA-XF-AAML-01	7.62	DECEASED	luminal	0.263541	0.545406	0.465452	0.913724	1.14178	1.06281	0.066555	0.789809	0.881831	-0.043387	-0.100033	-1.99373	-2.14391	-1.51815	-0.357966	-1.62107	-1.73136	-0.583156	1.36302	-0.145057	-2.17032	-0.61663	-0.372348	-0.498612	-0.550094	-0.435573	-0.03016	0.159794	-0.328918	-0.103249	-0.185682
	TCGA-DK-AA6U-01	18.99	LIVING	luminal	0.532579	0.186662	0.549956	1.03554	0.944064	0.92737	0.384382	0.536168	0.456855	0.400917	0.695918	-1.66083	-1.53202	-1.18007	-1.05608	-1.27962	-0.87576	-0.070726	1.12978	0.381486	-0.701261	-0.44279	-0.741534	-0.04991	0.087721	-0.237032	-0.107452	0.731527	-0.032123	-0.1853	0.208081
	TCGA-G2-AA3D-01	70.27	LIVING	luminal	0.46289	0.852949	0.522781	-0.1654	0.676996	0.364463	1.16987	1.08017	0.76393	0.86156	0.860621	-1.4586	-1.59733	-0.926877	-0.945324	-1.08327	-0.155409	-0.105248	-0.106191	-0.40567	-1.5621	-0.249466	-0.534061	-0.120592	0.095502	-0.648974	0.8238	-0.119754	-0.394883	0.191968	0.250447
	TCGA-CF-A27C-01	13.96	LIVING	luminal	0.258826	0.650559	0.833993	0.669995	0.787982	0.400304	0.807192	0.946559	0.882853	1.36093	0.66568	-1.11116	-1.32279	-0.949489	-0.820798	-2.04651	-0.977955	0.233185	-0.180678	-0.672498	0.145037	-0.430254	-0.527039	-0.125561	-0.358007	0.17769	0.890319	-0.212447	-0.467146	0.151173	0.654194
	TCGA-G2-A3IE-01	20.11	DECEASED	luminal	-0.330355	0.935722	0.870888	1.1983	1.3257	1.12155	0.838204	1.07567	0.921556	1.29683	0.598575	-1.2435	-1.26353	-0.538835	-0.769863	-1.58873	-0.133	-0.160627	-0.647942	0.225078	0.109143	0.178164	-0.447287	-0.481724	-0.487947	0.052926	-0.202633	-0.586353	-0.941069	0.454838	0.877846
	TCGA-BT-A42C-01	28.68	LIVING	luminal	-0.087237	0.332495	0.849718	1.01676	0.559798	0.393133	0.338789	0.232538	0.516002	0.29122	0.642526	-1.24553	-1.12684	-0.774538	-0.576761	-1.82273	-0.796047	-0.421556	0.108213	0.738601	-0.218893	0.338185	-0.607558	-0.242149	-0.093808	0.34375	0.437182	0.196164	-0.569431	0.454991	0.4525
	TCGA-G2-A3VY-01	17.61	LIVING	luminal	-0.313158	-1.62311	0.74701	0.693103	1.10223	0.562723	0.585438	1.39333	1.22911	-0.090356	0.436497	-1.62817	-1.66778	-0.948523	-1.30212	-0.949147	-1.14835	-0.203328	-0.585202	-0.924675	-2.36369	-0.926288	-0.132926	-1.21084	-1.05076	-0.399787	-0.762246	-1.19992	-0.599779	-1.67122	0.113586
	TCGA-GV-A3QF-01	20.27	DECEASED	luminal	0.442199	0.674467	0.677599	0.919934	0.780388	0.664641	0.518063	0.890678	0.762816	1.15874	-0.444754	-0.664787	-0.735072	-0.230678	-0.045783	-0.417963	-1.89044	-0.184409	-1.41774	-2.26859	-1.06583	-0.88016	-0.968658	-2.20553	-1.61228	-2.03862	-1.70863	0.0956	-0.545364	-3.12971	0.354139
	TCGA-4Z-AA80-01	0.62	DECEASED	luminal	-0.08445	0.249219	0.893682	1.04567	1.08348	1.04051	0.507454	0.499545	0.733301	1.15762	0.439477	-1.04204	-1.18607	-0.741937	-0.272455	-1.26688	-1.11062	-0.207024	-1.11611	-0.407951	-1.31897	0.148428	0.14276	-1.58069	-1.19924	-0.49462	-1.67527	0.030749	-1.2889	-3.12971	0.579019
	TCGA-KQ-A41O-01	50.53	LIVING	luminal	1.28655	0.919675	0.800242	0.921429	0.077032	0.808243	0.846055	0.995651	1.17349	0.66112	-0.02577	-0.774562	-0.637797	-0.459965	-0.333079	-1.28014	-1.50698	-0.10572	-1.8539	-0.416204	-0.245705	-0.864753	-0.943219	-0.979123	-0.923199	-0.592784	-1.31949	-0.889164	-0.137799	-1.56897	0.927514
	TCGA-ZF-A9R4-01	30.26	LIVING	luminal	0.406963	0.877205	0.831365	1.07577	0.936491	1.05763	0.193033	1.14678	0.931561	0.097561	0.121077	-0.537822	-1.75467	-1.70745	-0.990351	-1.77543	-1.62378	-0.341727	-0.93059	-0.827898	-1.99318	-0.966904	-1.07478	-0.358666	-0.538221	-0.838784	-0.63569	-1.23697	-0.518231	-1.41694	0.663028
	TCGA-ZF-A9RM-01	47.8	LIVING	luminal	-0.310358	0.856366	0.611438	0.843207	0.845129	0.787283	0.947958	1.0476	1.24411	1.17023	0.154221	-1.85735	-1.86048	-1.16853	-2.58277	-1.04862	-1.84779	-0.26636	-1.66125	-0.664876	-1.00015	-0.640829	-0.916869	-1.75107	-2.03952	-2.03862	-0.941111	-1.11892	-0.490131	-1.91792	0.452479
	TCGA-E7-A5KE-01	0.56	LIVING	luminal	0.455123	0.658211	0.899125	1.04099	-0.089353	0.490661	0.463123	0.943823	0.772979	0.368964	0.511947	-1.233	-1.64601	-1.27704	-0.999264	-2.51066	-1.92312	-0.211429	-0.83133	-0.645869	0.066934	0.234849	-2.01616	-1.04087	-1.24635	-0.326754	-1.86532	-0.014586	-0.679319	-1.06463	0.436736
	TCGA-ZF-A9RL-01	88.8	LIVING	luminal	-0.244297	0.516144	0.937587	1.13934	0.481492	0.750794	0.643563	0.918697	0.924056	1.01157	0.507622	-1.68528	-1.88619	-1.06548	-1.1483	-2.58867	-1.32619	-0.076005	-1.22106	0.5182	-0.695073	-0.008639	-0.683947	-0.402396	-0.838918	-0.398257	-0.47455	-1.03523	-0.521518	-1.43435	0.740114
	TCGA-LT-A8JT-01	21.06	LIVING	luminal	-0.056993	0.820526	0.839245	1.00113	0.822149	0.812161	0.855926	0.920237	0.914772	0.719165	1.03011	-0.557661	-0.482577	-0.181412	-0.883623	-0.91936	0.230606	0.076536	-0.969987	-0.348943	-0.73239	-0.271569	-0.893203	-0.732883	-1.08704	-2.03862	-0.879527	-0.827712	-0.564286	-1.49704	0.617755
	TCGA-E5-A4U1-01	38.8	LIVING	luminal	0.304355	-0.6568	0.608798	0.670279	1.22833	0.863759	0.51814	0.289741	0.551742	1.14722	0.230523	-1.21753	-1.06577	-1.0999	-1.11371	-1.58119	-1.26446	-0.024013	-0.077236	1.14216	-0.691537	0.068041	-0.803187	-1.42895	-1.55756	-2.03862	-1.27612	-0.470631	-0.315453	-1.80741	0.650241
	TCGA-CF-A47X-01	12.61	LIVING	luminal	0.066085	0.456637	1.0451	1.09116	0.911444	0.860969	0.77375	1.33381	1.04105	1.21453	0.646235	-1.03397	-0.754551	-0.372899	-2.58277	-1.22835	-0.463784	0.300675	0.775533	-0.888638	-2.27214	-1.26172	-1.32229	-1.55645	-1.13441	-2.03862	-0.924286	-0.850916	-0.419041	-1.54796	0.735297
	TCGA-G2-AA3F-01	29.34	LIVING	luminal	0.419606	0.888508	0.60182	1.27264	1.05286	0.945919	1.04582	1.14922	0.82049	-0.072123	0.51513	-0.746195	-0.702719	-0.633194	-1.01199	-0.729891	-0.305285	0.110181	0.009952	-0.16461	-0.94288	-1.24324	-0.537194	-0.767515	-0.486862	0.003058	-0.709191	-1.03946	-0.49484	-0.191062	-0.002937
	TCGA-FJ-A3ZF-01	17.21	LIVING	luminal	0.8449	0.759615	0.659246	1.06572	1.04531	0.666594	0.981217	1.23908	1.05577	-0.473829	0.858784	-1.38284	-1.4703	-0.98419	-1.32472	-1.14558	-0.763068	-0.091579	-0.301735	-0.644387	-3.08765	-1.79088	-0.898414	-1.47812	-1.69069	-2.03862	-1.82782	-1.88542	-0.633935	-1.69361	-0.559624
	TCGA-DK-A6B1-01	67.31	LIVING	luminal	0.607383	0.684955	0.948868	1.28277	1.1038	0.993408	1.2043	0.893254	1.20792	-0.551037	1.10257	-0.414862	-0.287959	-0.239281	-0.492513	-1.53099	-0.235765	0.199389	0.172313	-0.143983	-1.66176	-2.72264	-0.943813	-1.44053	-1.5591	-0.747063	-2.0022	-1.32769	-0.71743	-1.40182	-0.899298
	TCGA-GU-A42P-01	10.91	DECEASED	luminal	0.708564	0.747846	0.407861	0.911797	0.416841	0.753998	1.41959	1.03651	0.655102	-0.2417	0.42142	-0.665278	-0.907221	-0.533454	-0.898411	-0.963604	-1.38754	1.16162	1.47646	-0.491855	-2.55695	-2.23484	-1.14282	-1.58754	-1.58665	-0.925363	-1.80422	-0.653606	0.047575	-0.589958	-1.58808
	TCGA-H4-A2HO-01	1.51	LIVING	luminal	1.69494	0.99903	0.867393	1.17441	0.697802	0.998821	1.74563	1.58115	1.23964	-0.306917	1.42039	-0.367775	-0.363751	0.651723	-0.887127	-0.259281	0.394065	-0.256892	1.15927	0.011781	-1.41813	-1.66328	-0.876485	-1.85874	-1.38666	-2.03862	-2.52645	-0.428031	-0.72379	-1.38103	-0.13727
	TCGA-GV-A3QH-01	8.48	DECEASED	luminal	0.092868	0.754348	0.767584	1.05528	-0.117224	0.375008	0.930751	0.991994	1.12122	0.260465	0.327815	-1.35979	-1.62579	-0.968141	-1.09472	-0.595217	-1.20218	-0.597978	-0.468241	-0.923542	-2.65917	-0.726855	-1.04163	-1.18957	-0.962418	-0.670253	-1.61386	-0.247318	-0.525024	-0.776786	-1.46068
	TCGA-XF-A8HC-01	6.57	DECEASED	luminal	0.476322	0.620109	0.649565	1.3477	0.625683	0.89507	0.876784	0.835485	1.18656	0.18483	0.713346	-1.29626	-1.29598	-0.721433	-1.09644	-0.603598	-0.806017	0.124689	-1.2252	-0.544781	-0.754759	-1.25447	0.137439	-0.59218	-0.410487	0.328081	-1.0786	-0.338706	-0.712552	-0.668359	-0.720978
	TCGA-GV-A40G-01	19.05	LIVING	luminal	1.01071	-0.222693	0.155529	0.726892	-0.144609	0.331642	0.559619	0.689016	0.839577	0.1224	0.427194	-0.64603	-0.633283	-0.390136	-1.07785	-1.00483	-1.59272	0.105309	-0.207666	-0.41611	-0.737817	-0.65658	-0.403472	-0.9142	-1.26051	-0.466545	-1.16492	-0.298341	0.078225	-1.02842	-1.58725
	TCGA-E7-A4IJ-01	22.14	DECEASED	luminal	-0.190644	0.138924	0.801051	1.05262	1.163	1.06975	0.589656	0.779618	0.416479	0.771401	0.467881	-0.713897	-0.801475	-0.769391	-0.459695	-1.2186	-0.623123	-2.16784	0.990893	-0.754969	-1.56606	-0.310064	-0.137568	-0.488623	-0.455545	0.382077	-0.936657	0.18567	-0.91296	-0.45661	0.501729
	TCGA-DK-AA76-01	12.02	LIVING	luminal	-0.787587	0.974822	0.919903	0.96342	0.829545	0.567612	0.271249	0.482257	0.559336	1.13724	0.61491	-1.10088	-1.27679	-0.880601	-0.723836	-1.33128	-1.22709	-2.16784	0.2088	0.273554	-2.6043	-0.45458	-0.680232	-0.8162	-0.130871	0.146792	-0.859204	0.448499	-0.288505	-0.839941	0.929472
	TCGA-E7-A8O8-01	0.43	LIVING	luminal	0.982146	0.563512	0.736516	0.877264	0.970151	1.08271	0.832954	1.11864	1.12235	1.15155	0.883661	-0.634003	-0.79947	-0.449985	-0.409103	-2.18334	-0.743104	0.492729	0.317507	-0.00298	-2.07141	0.445276	-0.973033	-0.073054	0.043931	-0.130496	-1.10362	-0.329955	-0.581181	0.803061	0.475851
	TCGA-CU-A3QU-01	5.19	LIVING	luminal	0.837765	-0.640798	0.62269	1.37529	0.95817	0.932783	0.559321	0.743467	0.517647	-1.001	0.52919	-1.64746	-1.5207	-0.85839	-0.486961	-1.21098	-1.81636	-0.577654	0.013454	-2.26859	-2.22838	-2.98813	-1.18245	-1.66071	-1.07014	-0.260472	-1.7403	0.447195	-1.09875	-1.13457	-2.19925
	TCGA-HQ-A2OE-01	38.57	LIVING	luminal	0.239899	-1.5067	0.848177	-0.403572	0.37975	0.223162	0.740332	-0.083438	0.286163	0.743123	0.447245	-1.48857	-1.2454	-0.867991	-1.38915	-0.759034	-1.07525	-0.841281	1.53577	0.240849	0.70714	0.475965	-1.10848	-0.515425	-1.02807	-0.3465	-1.09493	-1.95467	-0.767638	-2.07662	0.514775
	TCGA-ZF-AA51-01	56.31	LIVING	luminal	0.151006	-1.36204	0.323724	-0.849777	1.0904	1.07856	0.818153	0.884968	-0.567915	1.23524	0.72803	0.027009	-0.161214	-0.076499	-0.400547	-0.03997	0.725954	-2.16784	0.690124	0.037307	-0.067889	-0.34324	-1.41967	-1.57359	-1.06351	-2.03862	-0.478375	-0.442199	-1.02011	-3.12971	0.834905
	TCGA-GV-A6ZA-01	22.7	LIVING	luminal	0.475296	-1.44589	0.703045	0.771105	0.808001	0.910675	0.254487	0.719126	0.564692	1.61963	0.614885	-0.771224	-0.928507	-0.954616	-0.838323	-1.483	-0.617247	-2.16784	0.009794	-0.418905	-1.43083	-0.267829	-0.615419	-0.982573	-0.419438	-0.001663	-0.497953	-0.925813	-0.488131	-3.12971	0.469453
	TCGA-4Z-AA7R-01	17.15	DECEASED	luminal	-0.584002	-1.62044	0.561247	-0.657912	1.12459	0.883985	0.220037	-0.026432	-0.78397	-0.507071	0.48462	-0.368638	-0.621285	-0.283166	-0.215718	-0.762252	-0.011496	-0.507834	0.82	-0.288267	-1.66284	0.196517	-0.506461	-0.779951	-0.311183	0.068633	-1.18344	-0.842015	-0.283282	-1.108	-0.37161
	TCGA-DK-AA6P-01	15.01	LIVING	luminal	-1.32645	-1.81077	0.661577	0.914352	1.12674	1.1947	0.495967	-0.672393	-0.386835	1.38885	1.0324	-1.08608	-1.364	-0.454865	-1.11828	-1.17153	-0.096147	-2.16784	1.9181	-2.26859	-2.38234	-0.193815	-1.07593	-1.06587	-0.960216	-0.623241	-1.70734	-1.66466	-0.894235	-0.241818	0.54398
	TCGA-GV-A3QI-01	36.47	LIVING	luminal	-1.83616	-1.76413	0.405968	0.554603	0.546455	0.956931	0.071118	-1.33635	-0.601727	0.737586	0.382101	-1.33601	-1.30194	-0.792576	-0.121432	0.142153	-1.96821	-2.16784	0.846331	-0.152075	-0.317673	-0.988763	-0.454143	-2.50827	-0.876586	-0.959368	-1.62525	-1.91966	-1.15051	-1.40218	0.29916
	TCGA-BT-A20P-01	17.87	DECEASED	luminal	0.934547	-2.08109	0.889315	-0.760789	1.1924	0.599939	-0.224955	0.385261	0.11428	1.29086	0.887582	-0.100257	-0.37185	-0.50252	-0.990005	-1.35399	-0.561506	-2.16784	0.306125	-2.26859	-0.874937	0.546423	-0.827577	-1.8668	-0.874837	-0.435	-0.732937	0.113512	-0.421874	-0.378571	0.568042
	TCGA-CF-A8HY-01	11.33	LIVING	luminal	1.1376	-0.516082	0.264107	-0.061507	0.470482	0.847763	0.293867	0.662152	0.097109	1.346	0.895973	-0.408912	-0.254598	-0.560295	-2.58277	-0.775191	-1.02386	0.121082	-0.32244	-2.26859	-0.100739	-0.343698	0.081053	0.052984	-0.871939	-0.465357	0.807023	-3.87677	-0.65848	0.039232	0.208409
	TCGA-CF-A5UA-01	11.99	LIVING	luminal	1.90534	-2.22616	0.59816	-0.686369	0.650043	0.536805	0.096939	0.283438	0.653634	1.69347	0.987847	-0.880758	-1.09204	-0.796835	-2.58277	-1.55864	-0.028143	0.128211	-0.044045	-2.26859	-1.04914	0.290505	-0.356294	0.570295	-0.373963	0.15932	-0.611767	-0.878157	-0.396307	-0.743671	0.638204
	TCGA-XF-A8HB-01	45.01	LIVING	luminal	-0.01727	0.197883	0.691309	-1.00032	-0.148055	0.158272	0.060508	-0.940721	-1.01975	0.967879	0.305781	-1.03524	-1.30672	-0.951981	-0.833804	-1.1354	-1.82707	-0.724143	-0.358566	-0.4939	0.283921	0.717909	-1.60666	0.808464	0.863844	0.396827	0.994678	0.200578	-0.335387	0.873181	0.309004
	TCGA-XF-A8HI-01	17.87	DECEASED	luminal	-0.021556	0.378939	0.826749	-0.280996	0.619721	0.522681	0.151115	0.381084	-0.075962	1.13777	0.928887	-0.677789	-0.765055	-0.213738	-1.16593	-0.957475	-0.624451	-0.178301	0.259449	-0.00413	0.347848	-0.530957	-0.656031	0.614412	0.287885	-0.033881	-0.704797	-0.081464	-0.512367	-1.10408	0.534449
	TCGA-4Z-AA7Y-01	50	LIVING	luminal	0.440426	0.378009	0.654803	0.054743	0.575306	0.90666	0.516636	0.273758	0.354782	1.21715	0.656143	-1.03454	-1.0215	-0.725871	-0.744524	-0.556769	-1.09789	-0.381064	0.51164	-0.257921	0.494395	0.738279	-0.97931	-0.171925	-0.53928	-0.021782	1.41712	-0.626196	-0.841462	-0.985252	0.434505
	TCGA-DK-A1AA-01	18.99	LIVING	luminal	0.363217	0.832575	0.589271	-0.133452	0.487544	0.422681	0.208387	0.422865	0.702998	1.19183	0.857626	-0.422207	-0.525017	-0.235294	0.027875	-0.937438	-0.406908	-0.314715	-0.496483	-0.085412	1.03838	0.29505	-0.109755	0.608682	0.497034	-0.254106	-0.138101	-0.065248	-0.427449	0.978954	0.750183
	TCGA-FT-A3EE-01	3.25	DECEASED	luminal	0.328285	0.696342	0.05435	-0.936417	0.295682	0.334133	0.41498	-0.301341	0.071634	1.1417	0.883315	-0.925327	-0.78839	-0.658038	-0.614274	-1.09766	0.026935	-0.303251	-0.758565	-0.404039	1.11806	0.895375	0.439798	-0.02263	0.144233	0.052189	-0.094464	-0.445082	-1.19032	0.756672	0.164159
	TCGA-ZF-A9R7-01	21.85	LIVING	luminal	0.70606	0.424671	0.777601	-1.01201	0.812739	-0.098067	0.519891	0.474082	0.462875	-0.154119	0.705138	-1.55028	-1.44757	-1.05545	-0.640341	-0.987489	-0.013608	-0.087242	-0.305075	0.177072	-0.713221	0.598376	-0.703641	0.047552	0.164564	0.121547	0.86322	0.017046	0.23661	0.70738	0.42349
	TCGA-FJ-A3ZE-01	10.64	DECEASED	luminal	-0.061822	0.944131	0.67979	-0.488323	1.00379	0.598835	0.115272	0.378161	0.933008	0.353479	0.688715	-1.06058	-1.09738	-1.08918	-0.464748	-1.56456	-0.855097	-0.370885	-0.353551	0.676184	-0.760425	-0.847996	-1.21058	0.4992	-0.311112	-0.255298	-0.355972	-0.511683	-0.037145	0.994602	0.562636
	TCGA-GU-A42R-01	18.96	DECEASED	luminal	-0.818279	0.890736	0.780455	1.01149	0.116018	0.336614	-0.114695	0.249757	0.699974	0.933773	1.08195	-1.07528	-1.09217	-0.783117	-0.880611	-1.10953	-0.278818	-0.01027	0.052884	1.42581	-0.835071	-0.243266	0.410414	-0.245656	0.87276	0.169596	0.543773	0.516031	-0.583146	0.77444	0.459447
	TCGA-DK-A3IS-01	50.23	LIVING	luminal	0.405518	0.846686	1.00381	0.741599	0.575266	0.59715	0.420182	0.868255	0.310102	1.47119	0.882852	-0.401921	-0.566275	-0.714174	-0.843539	-1.35128	-0.870782	-0.066471	0.02696	0.208621	0.005255	0.008421	0.257421	0.386719	0.712225	0.014808	-0.898887	-0.168291	-1.01408	0.418668	0.66657
	TCGA-ZF-AA4U-01	8.61	DECEASED	luminal	-0.08394	0.821701	0.741368	-0.258587	0.55828	0.498521	-1.53638	0.052844	0.370042	1.38908	0.327235	-1.7376	-1.94867	-1.32892	-2.58277	-1.92486	-2.0161	-0.61425	0.238352	0.907167	0.427612	0.337165	-0.065772	0.644288	0.719129	0.211895	1.61298	-0.578531	-0.532492	0.990262	1.01932
	TCGA-4Z-AA89-01	33.8	LIVING	luminal	0.279036	0.656713	0.78871	0.843141	0.625292	0.753438	-0.311141	0.544109	0.536362	1.10384	0.14599	-1.85823	-2.00051	-1.33775	-2.58277	-1.46997	-1.96034	0.248171	-1.25685	0.110001	0.169435	-0.306269	-0.490585	0.543014	0.409151	0.218328	-0.232313	-0.188751	-0.200597	0.509932	0.657498
	TCGA-DK-A1AG-01	15.6	LIVING	luminal	-0.05974	0.006155	0.697257	0.299168	0.374281	0.259226	-0.033786	0.234502	0.608761	0.942145	0.611876	-1.41328	-1.34772	-0.943383	-2.58277	-0.683325	-1.37031	-0.025858	0.229516	-0.682378	0.588298	0.290183	-0.863703	0.469162	-0.008891	-0.108841	-0.171931	0.906891	-0.01464	0.363565	0.63244
	TCGA-UY-A9PA-01	35.22	LIVING	luminal	-0.09655	0.641963	0.565203	-0.091811	0.441501	0.630717	0.537487	0.107591	0.765974	1.2611	0.409729	-1.80341	-1.76483	-1.50175	-0.748278	-0.799274	-1.17048	0.153274	-0.502454	0.106969	0.649315	0.509774	0.778636	0.603075	0.722223	0.138578	1.43974	0.052096	-0.500232	0.555859	0.484258
	TCGA-GC-A3BM-01	21.39	DECEASED	luminal	-0.405618	0.474068	0.79084	0.613448	0.289938	0.175348	0.014433	-0.576183	0.299204	1.31941	0.986956	-0.448507	-0.655274	-0.44148	-0.803217	-0.873823	-0.586441	-0.220843	-0.309385	1.16972	0.308664	0.386143	-0.11036	0.833921	0.549933	0.093867	0.37078	-0.335379	-0.019231	0.797485	0.749462
	TCGA-H4-A2HQ-01	19.38	LIVING	luminal	-1.06275	0.726607	0.720109	0.83366	0.647679	0.629218	-0.348566	-0.221278	-0.451709	1.46932	0.970407	-0.767244	-0.936509	-0.595317	-1.1991	-0.654361	-1.47523	-0.172866	0.333124	0.241021	-0.546607	0.563382	-0.148691	0.1386	0.316007	-0.073597	0.706752	-0.233117	-0.522254	0.3877	0.937089
	TCGA-DK-AA77-01	20.3	LIVING	luminal	0.335043	0.955947	0.806169	0.913471	0.431922	0.717061	0.161776	0.914053	0.513679	1.13828	0.712111	-0.832698	-0.933049	-0.819743	-0.831852	-0.957613	-0.943045	-0.211503	-0.357657	-0.068066	-0.128871	0.189357	-0.292336	0.137243	0.247879	-0.059692	0.46422	-0.04674	-0.08445	-0.917322	0.467365
	TCGA-FJ-A3Z9-01	12.65	DECEASED	luminal	1.31854	1.13797	0.450786	0.902557	0.914635	0.948768	1.00269	0.964535	0.449043	1.12891	0.397776	-1.85159	-1.60901	-1.42784	-1.07918	-1.06423	-1.13072	-0.414836	0.929169	0.31588	-0.364005	0.124469	0.594338	0.374804	0.279197	0.05201	0.506003	-1.05302	-0.370065	0.681796	0.584014
	TCGA-ZF-A9R2-01	21.09	LIVING	luminal	0.17326	0.845609	0.866385	-0.510515	0.449675	0.019928	-0.642679	-0.009037	0.302203	0.397845	-0.119561	-1.90518	-1.48787	-1.61205	-0.921932	-1.34913	-2.70738	-2.16784	-1.41445	-0.081695	-0.134587	0.745466	-0.496951	0.382801	0.786756	0.368352	-0.45973	-1.32672	-0.642739	0.905057	0.557045
	TCGA-E7-A4XJ-01	2.23	DECEASED	luminal	1.1777	0.854658	0.302903	0.891317	0.786914	0.609015	1.23803	0.797342	0.912197	0.745511	1.01934	-0.615446	-0.407817	-0.383895	-2.58277	-0.46781	0.13593	-0.540157	0.383711	-0.064425	0.228813	-0.019847	0.513779	0.248178	0.256152	0.13453	0.646303	-0.071991	0.190105	-0.379379	-0.047601
	TCGA-BT-A20N-01	26.12	DECEASED	luminal	-1.35888	-0.362732	0.329617	0.582504	0.666497	0.838017	-0.594736	-0.215605	-0.254534	0.245018	-0.846216	-0.229335	-0.334182	-0.897483	-0.345447	-0.589246	-0.354504	-2.16784	-1.25736	0.393174	0.099073	0.63898	0.190035	-0.144308	0.507319	-0.372393	0.088565	-0.317734	0.131	0.90049	0.814308
	TCGA-FD-A6TE-01	12.35	LIVING	luminal	-0.22544	0.445758	0.654736	-0.145915	0.862156	0.818928	-0.449844	0.286881	0.314548	-0.871007	-2.55859	-1.87242	-1.53174	-1.37776	-0.969935	-1.81323	-1.60435	-2.16784	0.620081	-0.385889	-1.15273	-0.309204	-0.221157	-0.283837	-0.262369	-0.602696	0.647401	0.680135	0.271309	0.509392	-0.098488
	TCGA-4Z-AA7M-01	16.26	LIVING	luminal	-0.337313	-1.94085	0.44754	0.726248	1.1142	0.76982	0.447425	0.028607	0.709376	-0.656697	-2.55859	-1.4701	-0.563696	-1.15704	-0.12653	-0.755254	-0.777844	-2.16784	0.249807	-0.771648	0.101058	0.149603	-0.254333	-0.363407	-0.802357	-0.636667	-1.48719	-0.518054	0.004033	0.429025	0.605769
	TCGA-GD-A6C6-01	2.2	LIVING	luminal	0.758265	-0.214199	0.270057	0.518054	1.14289	0.408968	0.611441	-0.974161	-0.762446	-0.142778	-0.352133	-0.162596	-0.323819	-0.82043	-0.798392	-0.857422	-1.14698	-2.16784	-0.212685	-0.651961	-1.55955	0.067654	0.327543	-0.931419	-0.335256	-0.446986	-0.818016	-0.643549	-0.893194	0.048739	0.241281
	TCGA-DK-A3X1-01	66	LIVING	luminal	-0.470483	0.791672	0.517288	0.766694	1.02279	0.998711	0.89383	0.782697	0.112155	-1.16154	-0.843478	-0.144933	-0.059751	-0.581214	-0.158848	-0.706427	-0.604354	-2.16784	1.21963	0.348608	0.053917	0.407135	0.078786	-0.40972	0.156379	0.125289	-0.098551	0.091441	-1.23341	0.140117	0.531881
	TCGA-K4-A54R-01	27.66	LIVING	luminal	0.295692	0.805658	0.22153	0.845162	0.53643	0.038824	0.476425	0.148768	0.14861	-1.14	-0.584588	0.443188	0.235469	-1.10302	-0.607884	-0.017333	0.070339	-2.16784	1.64242	-0.538702	0.157753	0.538599	-1.0619	-0.130947	-0.197523	-0.51037	0.299007	-0.772823	-0.917667	0.801293	0.185793
	TCGA-CF-A47Y-01	12.25	LIVING	luminal	0.120583	0.691735	0.524582	-0.430078	0.99891	0.702182	-0.605998	0.048047	0.300715	1.40728	0.778341	0.227636	0.26939	0.413349	-0.531822	-0.175614	0.367236	-0.614362	-0.824877	-2.26859	0.673683	-0.822102	-1.32623	0.589941	-0.51303	-2.03862	-1.44863	-1.31135	-0.38954	0.341911	0.719591
	TCGA-S5-AA26-01	16.52	LIVING	luminal	0.097737	0.320541	0.618795	0.593775	0.89194	0.741154	0.146597	0.558539	0.595295	1.40027	0.695899	-0.032414	-0.137565	-0.059127	0.042985	-0.730714	-0.787666	0.122053	0.33005	1.22251	0.012269	0.149773	-0.692385	0.351667	-0.381039	0.225236	-0.34585	-1.14916	-0.123411	0.729389	0.793618
	TCGA-E7-A3Y1-01	5.35	LIVING	luminal	-0.387226	0.439667	0.635203	0.791198	0.840132	0.813121	-0.877254	-0.019803	0.145659	0.62791	0.90755	0.007239	0.030912	0.459251	-0.13591	-0.426556	0.255023	-0.134448	0.228194	0.362487	0.217449	-0.38212	-0.988152	0.599817	-0.055027	-0.527715	-0.451152	-1.21788	-0.142892	0.993288	0.710553
	TCGA-DK-AA6X-01	15.34	LIVING	luminal	-0.096	0.258577	0.600907	0.568814	0.205141	-0.39679	0.241664	-0.049025	0.02074	0.854457	0.442381	-0.043317	-0.141956	-0.051434	0.142617	-0.237394	0.393486	0.255567	0.574569	0.104457	0.005633	0.753757	-1.13975	0.100134	-0.410717	-0.118577	-0.294111	0.753837	-0.041943	-0.713982	0.172077
	TCGA-GV-A3JX-01	19.09	LIVING	luminal	0.135819	-0.011256	0.485028	0.739621	-0.106042	0.212227	0.18628	0.715215	0.605452	0.491485	0.503613	-1.09195	-1.14174	-0.944348	-0.847005	-0.771573	-0.611019	0.5081	1.87749	1.2929	-0.574729	-0.114639	-0.054045	0.360951	0.429071	0.433789	-0.017803	0.737464	0.338184	-0.214343	-1.43044
	TCGA-DK-AA6W-01	13.63	DECEASED	luminal	-0.852947	0.246907	-0.38305	0.400446	-1.22578	-1.34421	0.322173	-0.287627	0.141235	0.545724	0.963841	-0.701403	-1.09561	-1.12485	-0.581914	0.055179	-0.817491	0.38594	0.705486	0.748362	-0.943118	0.244011	-0.574528	-0.252782	0.32721	0.308359	0.576229	0.035213	0.190193	0.005805	-1.47666
	TCGA-XF-AAMH-01	11.3	DECEASED	luminal	1.50069	-0.203545	-0.149471	-0.161432	-0.511346	-1.1125	0.081455	0.218753	0.573758	1.37661	0.960772	0.127514	0.027244	-0.568634	0.4643	0.121273	0.455956	0.999667	3.05351	0.2767	1.28977	0.780154	-0.119852	0.775628	0.996098	0.781361	-0.729559	-0.835982	0.524674	-0.488741	-1.67284
	TCGA-XF-A9T2-01	18.89	DECEASED	luminal	2.47462	-0.662991	0.331442	-0.167656	-1.52165	-0.927327	-0.884334	-1.38235	-0.94779	1.22959	0.099466	-1.26603	-0.424612	-0.936198	-0.308579	0.058634	-0.728203	0.994828	3.84331	0.405617	1.56936	-0.000153	-0.387341	0.804698	0.766896	0.392702	-1.55646	0.17197	-0.604448	-0.590886	-0.402222
	TCGA-E7-A677-01	26.94	LIVING	luminal	-0.297425	0.415028	0.66426	-0.104506	0.348494	0.520783	0.937934	-0.722569	-0.573471	1.46288	0.524125	-0.428714	-0.279569	0.120231	0.479256	-0.708539	-0.216738	0.890791	2.46053	0.121036	1.27752	0.139536	-0.445681	0.496443	-0.332205	-0.281101	-0.926441	-0.82207	-0.115384	0.412772	0.936166
	TCGA-4Z-AA83-01	66.49	LIVING	luminal	0.23405	-1.29837	0.457211	-1.02103	0.290785	0.500716	0.352195	0.010917	0.323444	1.04168	1.12838	-0.209017	0.170361	0.359391	-0.859252	-0.615508	0.158145	-0.304752	-0.346656	-0.21492	0.775994	0.46618	-0.36462	-0.062272	0.01213	0.03415	0.55383	0.781984	0.455007	-0.983789	0.307276
	TCGA-E7-A519-01	16.69	LIVING	luminal	1.02055	0.039908	0.118464	-1.064	1.18178	0.406636	0.233283	0.520995	-0.049802	1.32775	0.947044	-0.085084	-0.070005	0.126427	-0.252797	0.196361	0.37279	0.404737	-0.11395	-0.565735	-0.333779	-0.271765	-0.691131	0.476149	-0.364366	-0.219826	-0.412426	0.746836	0.77445	0.027852	-0.075123
	TCGA-DK-A6AW-01	53.25	LIVING	luminal	1.3095	-1.28952	0.264758	0.37016	0.324121	0.922735	0.498078	-0.554268	-0.636418	0.274661	0.51199	0.382526	0.488539	0.039685	0.857225	-0.066887	-0.913685	0.706785	-0.083279	0.090943	-1.84678	0.378499	-0.663027	-0.512488	0.000869	-0.033107	-0.482176	1.8896	-0.965133	-0.717161	-0.857651
	TCGA-XF-AAN0-01	56.44	DECEASED	luminal	-0.364003	0.048592	0.202266	0.80511	-0.2619	-0.525284	0.691309	-0.969403	-0.235868	0.474341	1.21586	-0.088699	-0.011549	0.217956	-0.486687	-0.337546	1.08356	0.40051	-0.356619	-0.438426	0.886887	-1.99461	-0.485022	-0.322781	0.214646	0.58504	0.714453	2.11582	-0.30993	-0.224586	-1.05588

## Sheet: 7G-logrank-test
	Figure 7G. Log-rank test statistics of mRNA subgroup (TCGA MIBC cohort)
	Note that patients with overall survival of 5 years or less were considered for survival analysis (See Methods)
			Survival months at % mortality						Log-rank test P-value
	Name	No. of subjects	25%	50%	75%	90%	100%		Condition	P-value	Bonferroni P-value
	Basal	125	10	20	42	0	0		Basal vs.. p53-like	0.5368	1
	p53-like	106	14	24	46	56	60		Basal vs.. Luminal	0.0001	0.0001
	Luminal	118	20	58	0	0	0		p53-like vs.. Luminal	0.0019	0.0037
