# Supplementary figures and images for: Epigenetic regulation of mammalian Hedgehog signaling to the stroma determines the molecular subtype of bladder cancer
Source: eLife journal article supplement (doi:10.7554/elife.43024), 2019-04-29

Figure 1-figure supplement 1

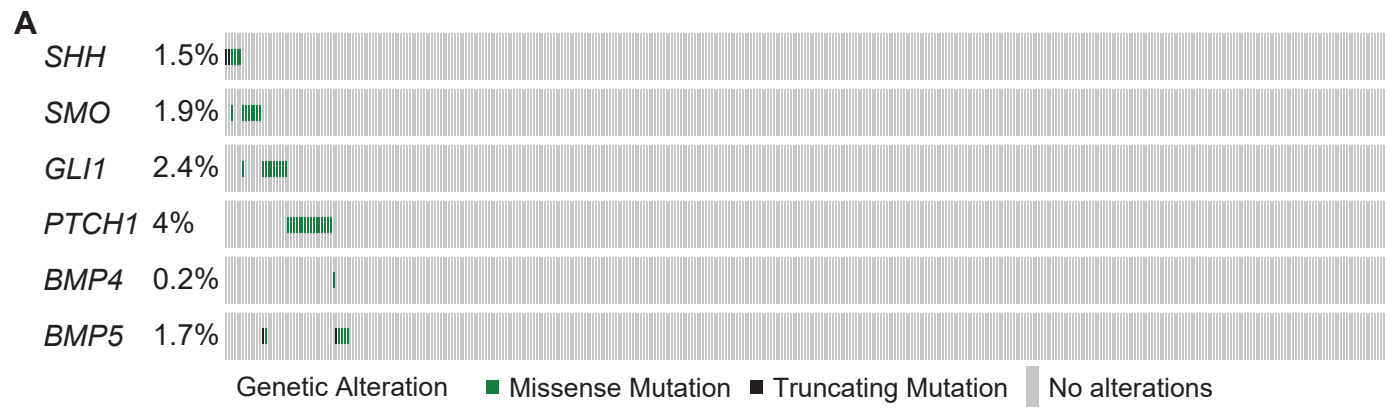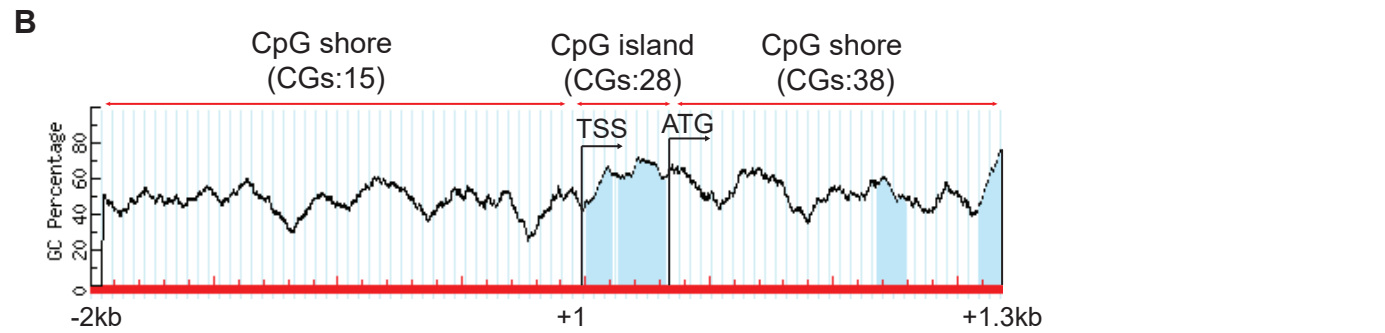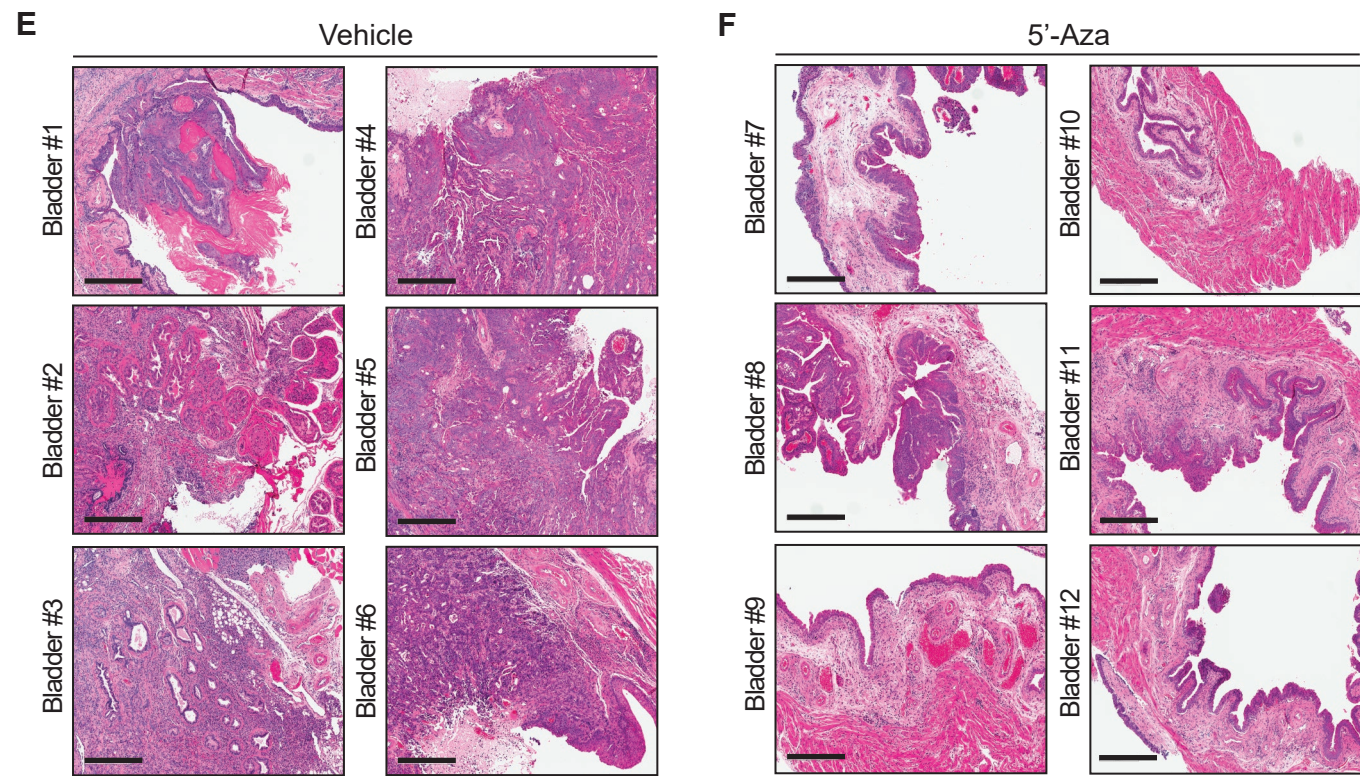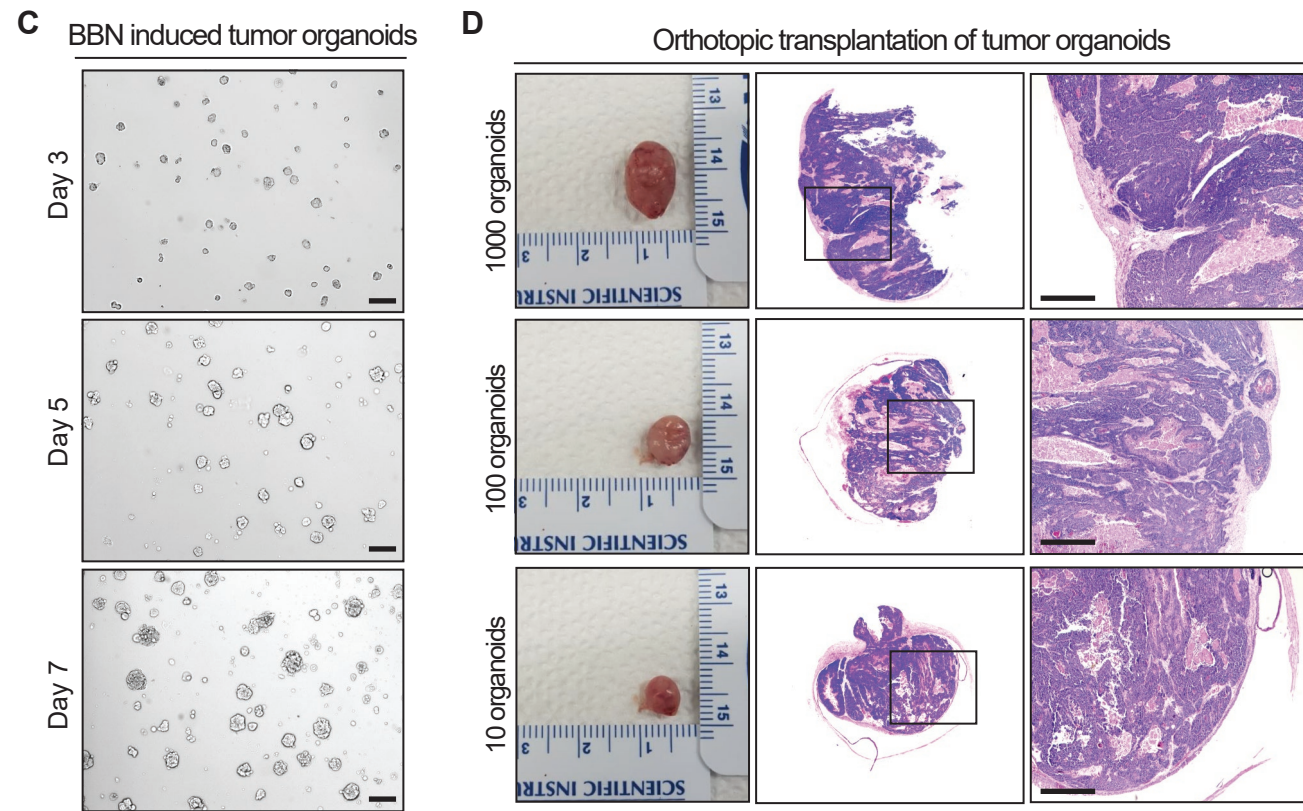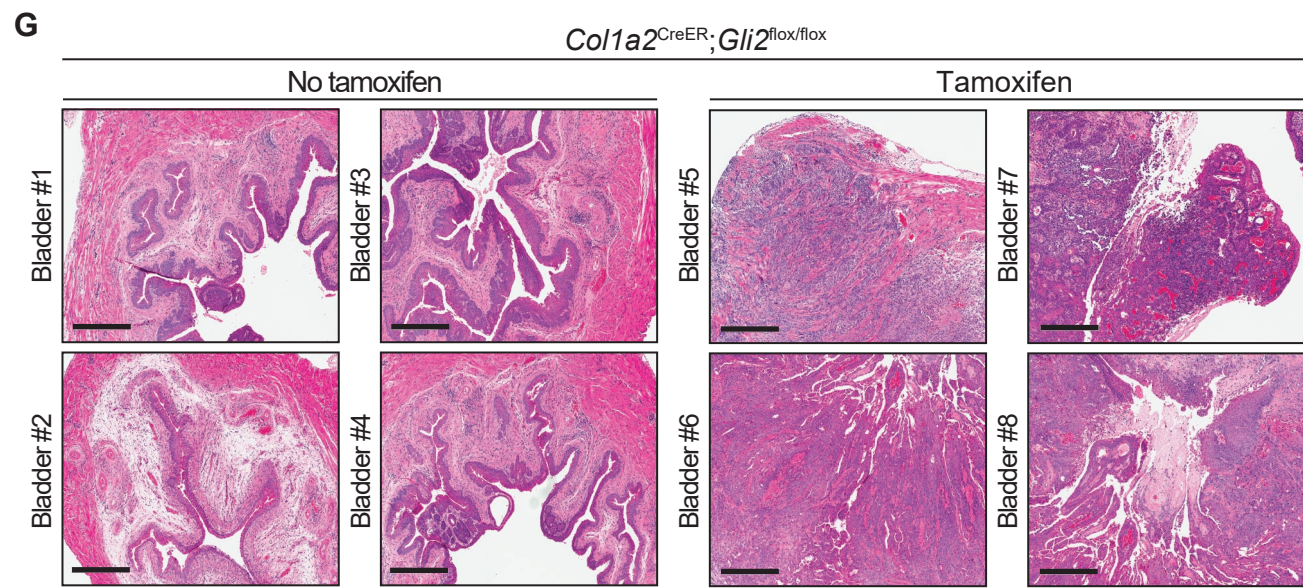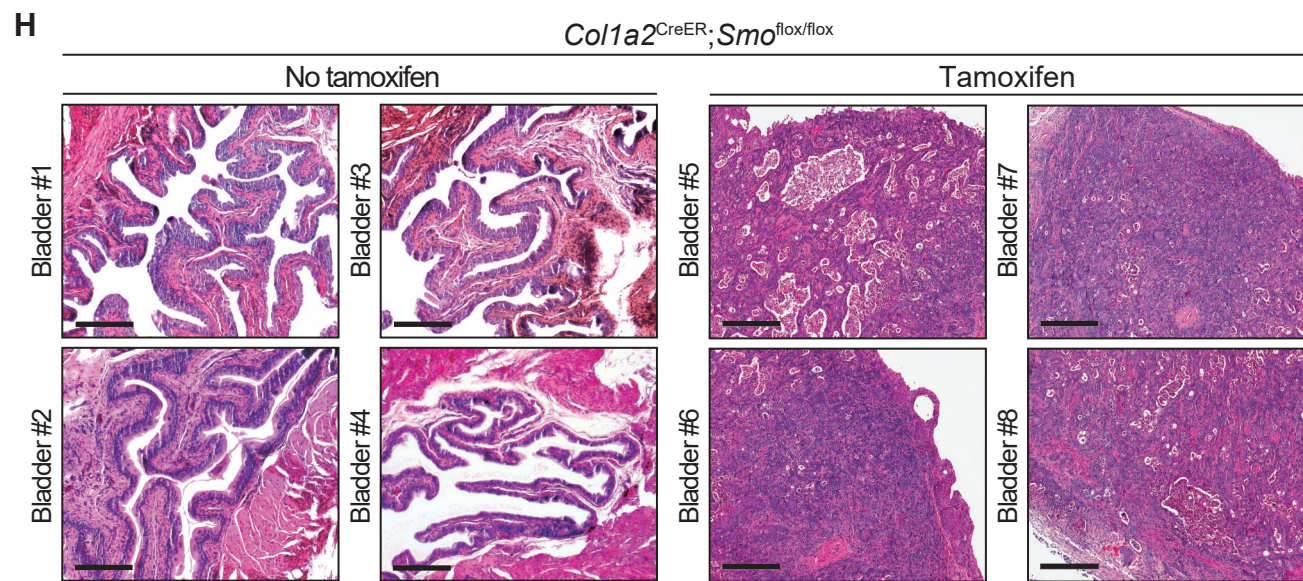

Supplement: supp [file elife_poa_e43024_Figure_1_figure_supplement_1.pdf › elife_poa_e43024_Figure_1_figure_supplement_1.pdf]

Figure 2-figure supplement 1

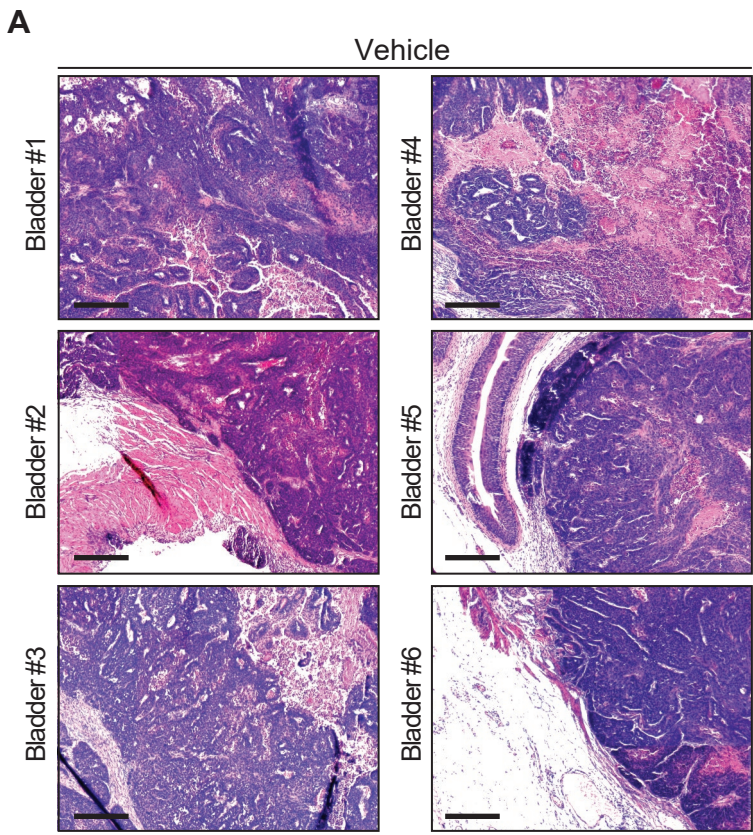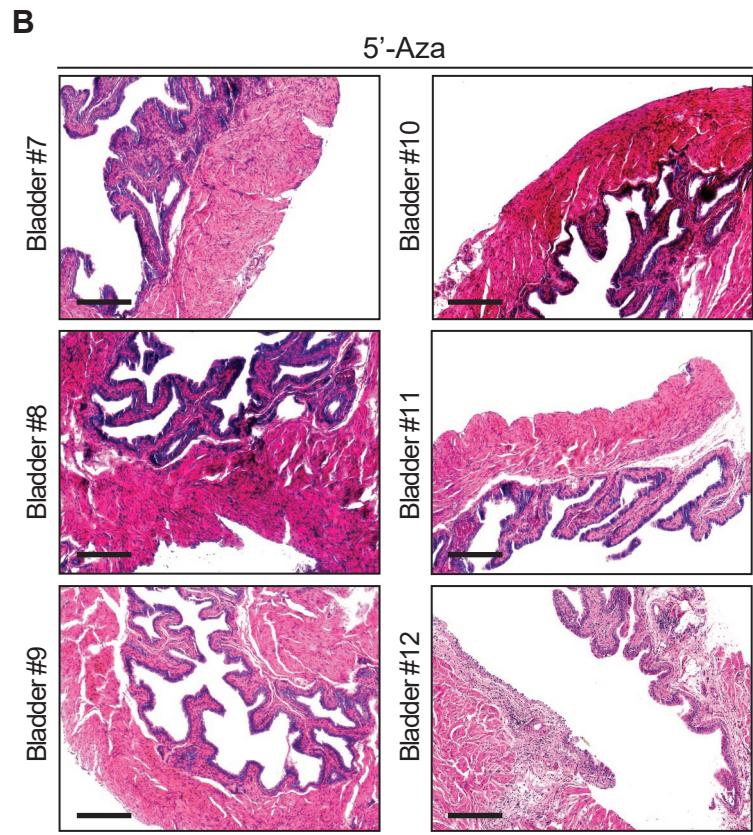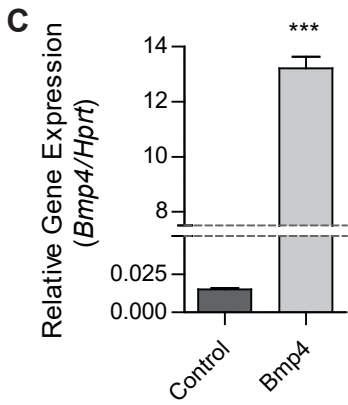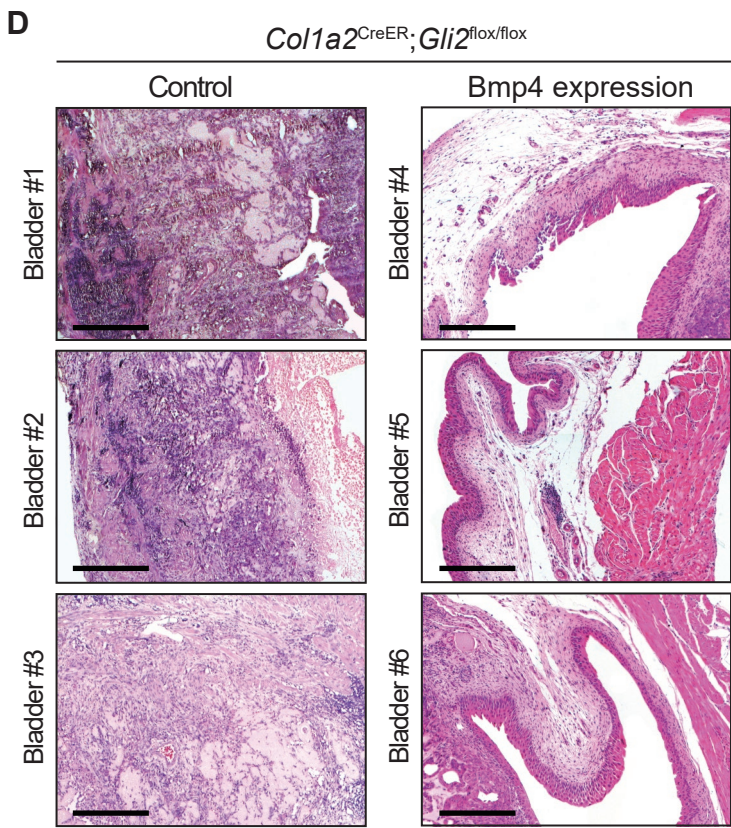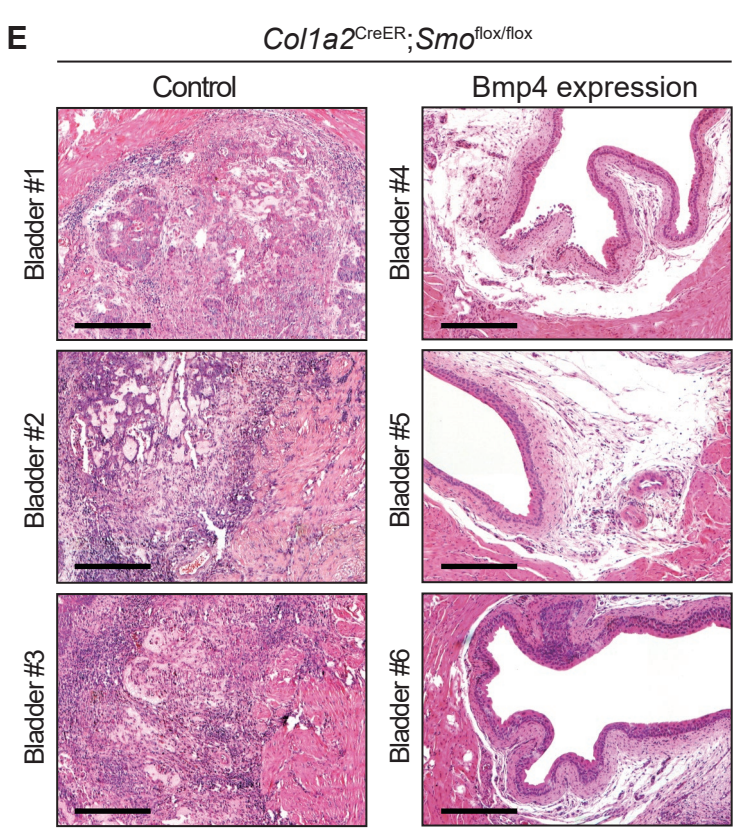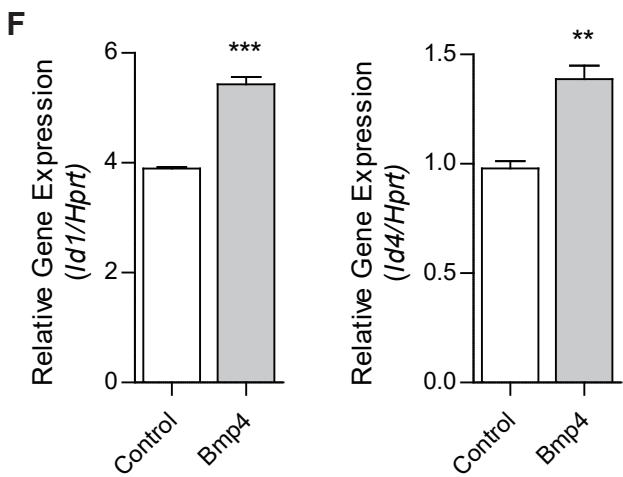

Supplement: supp [file elife_poa_e43024_Figure_2_figure_supplement_1.pdf › elife_poa_e43024_Figure_2_figure_supplement_1.pdf]

Figure 4-figure supplement 1

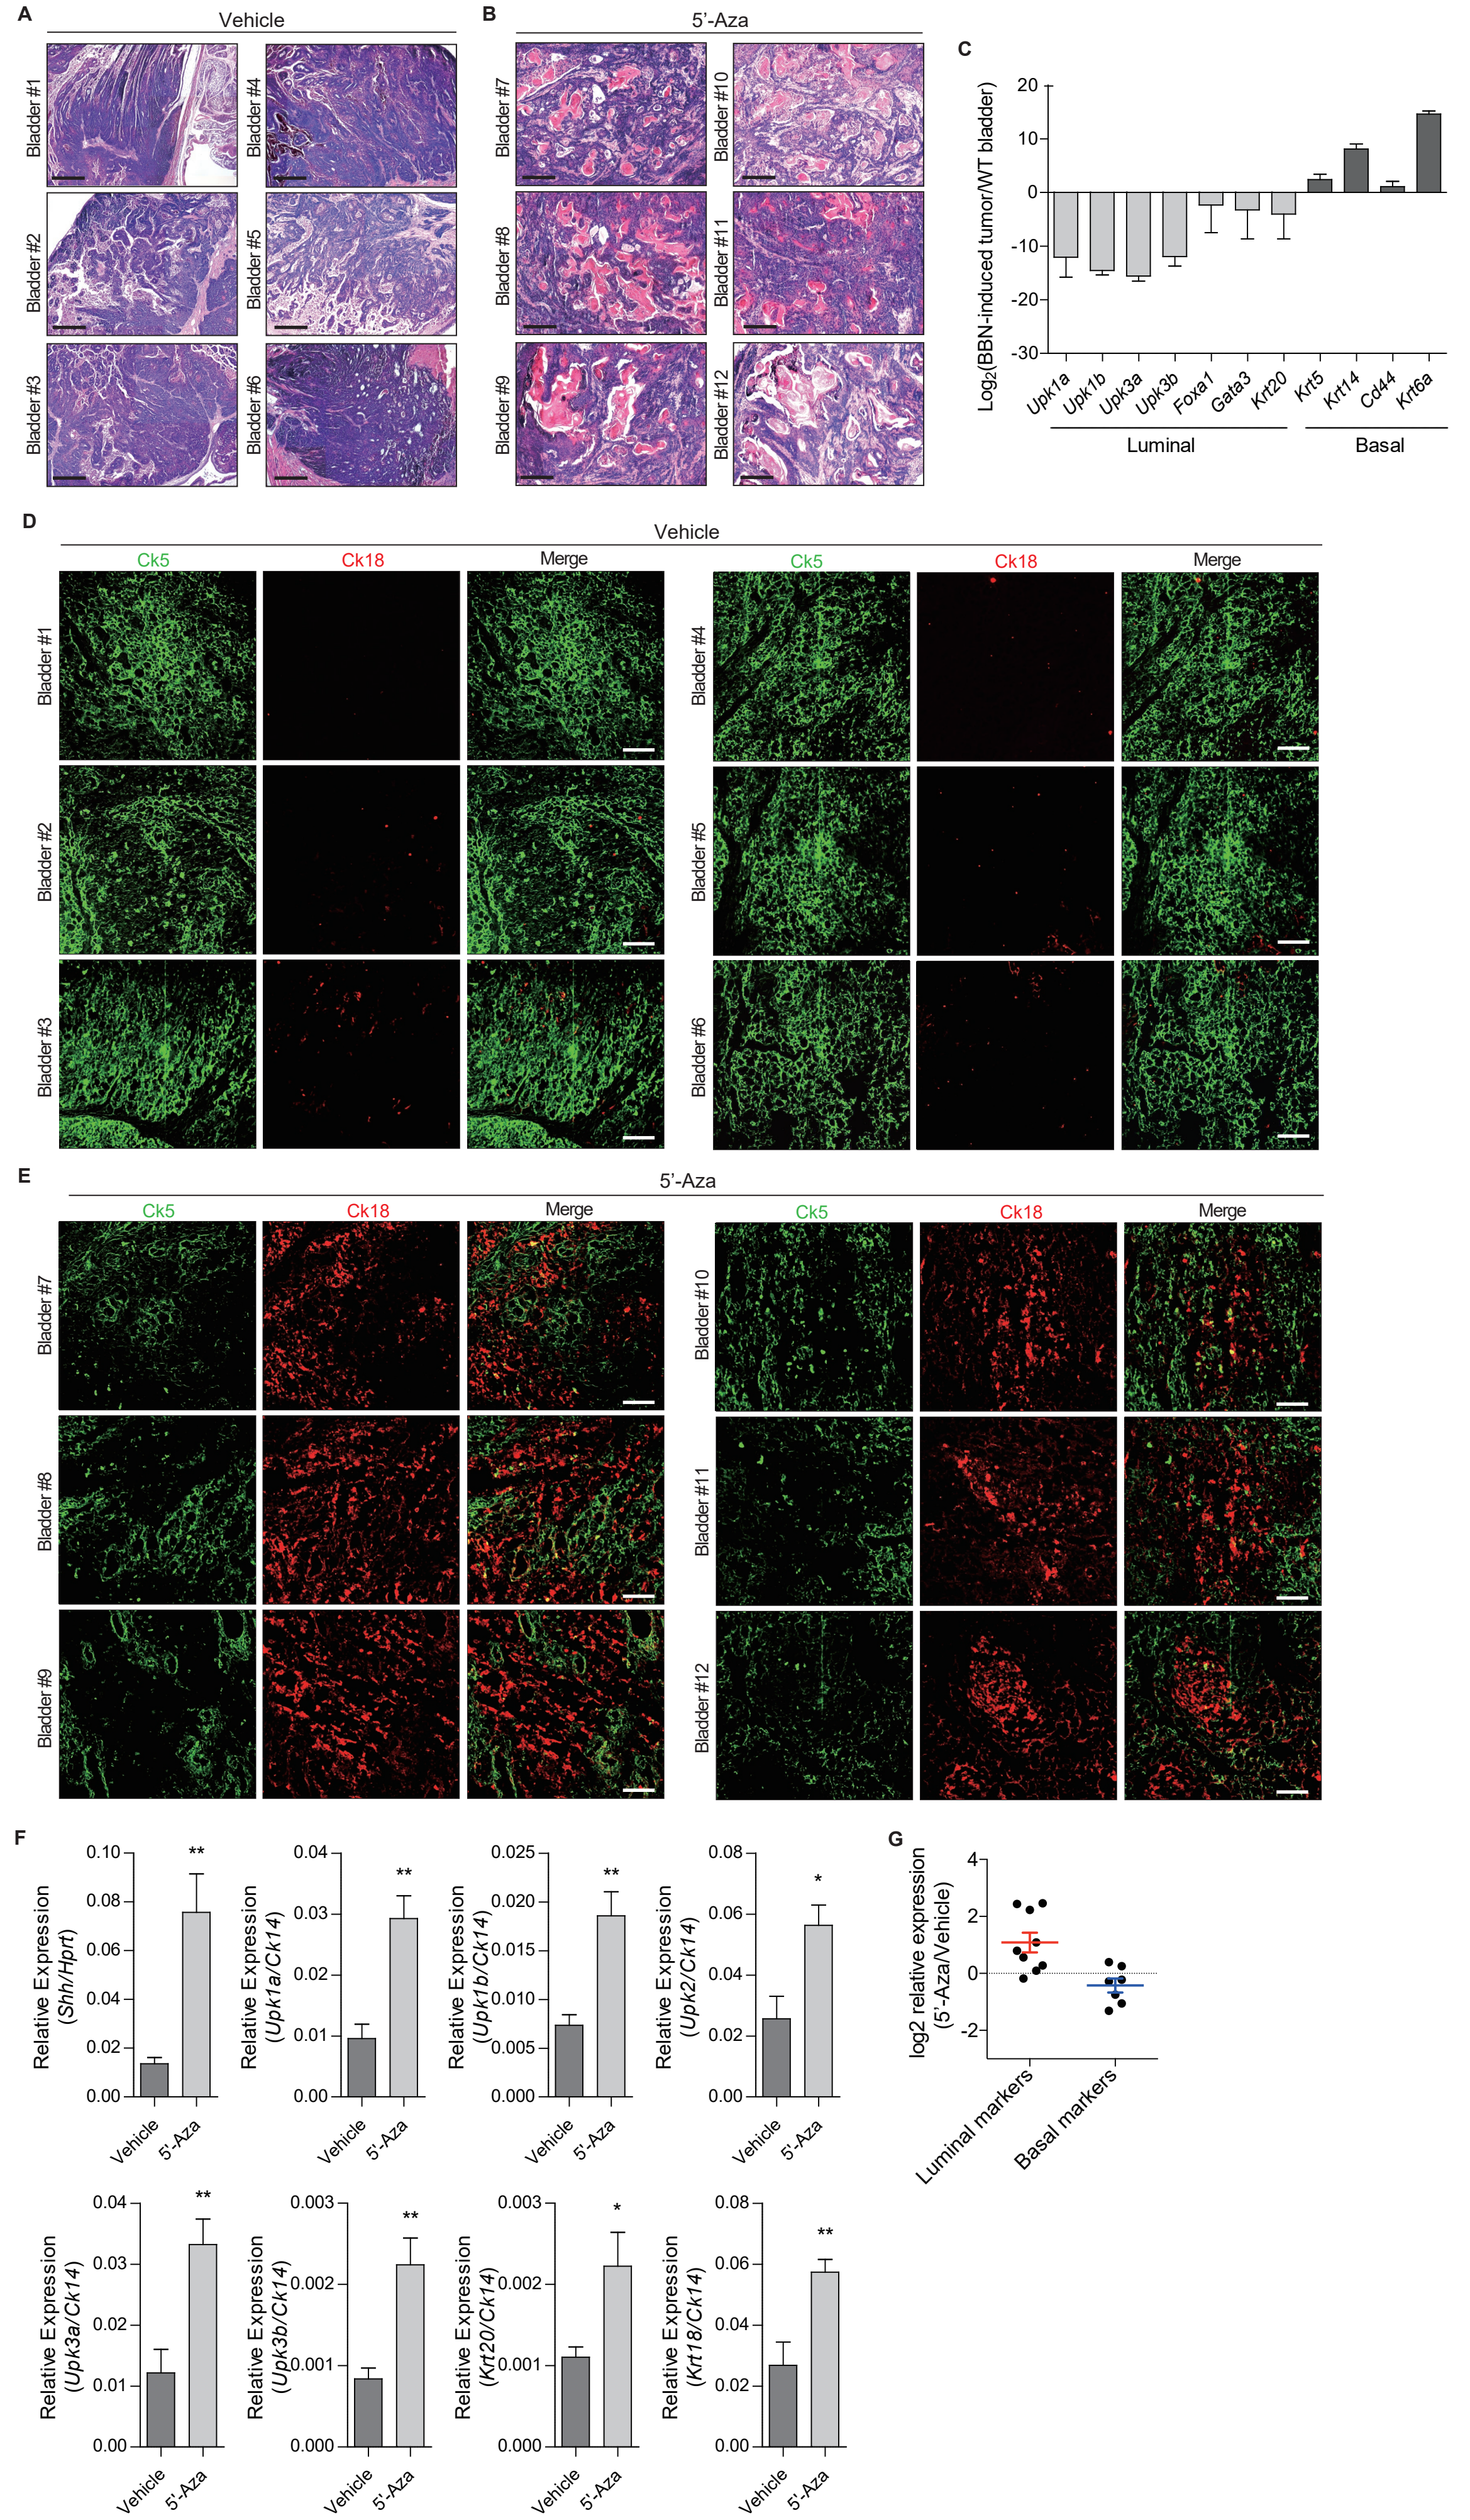

Supplement: supp [file elife_poa_e43024_Figure_4_figure_supplement_1.pdf › elife_poa_e43024_Figure_4_figure_supplement_1.pdf]

Figure 5-figure supplement 1

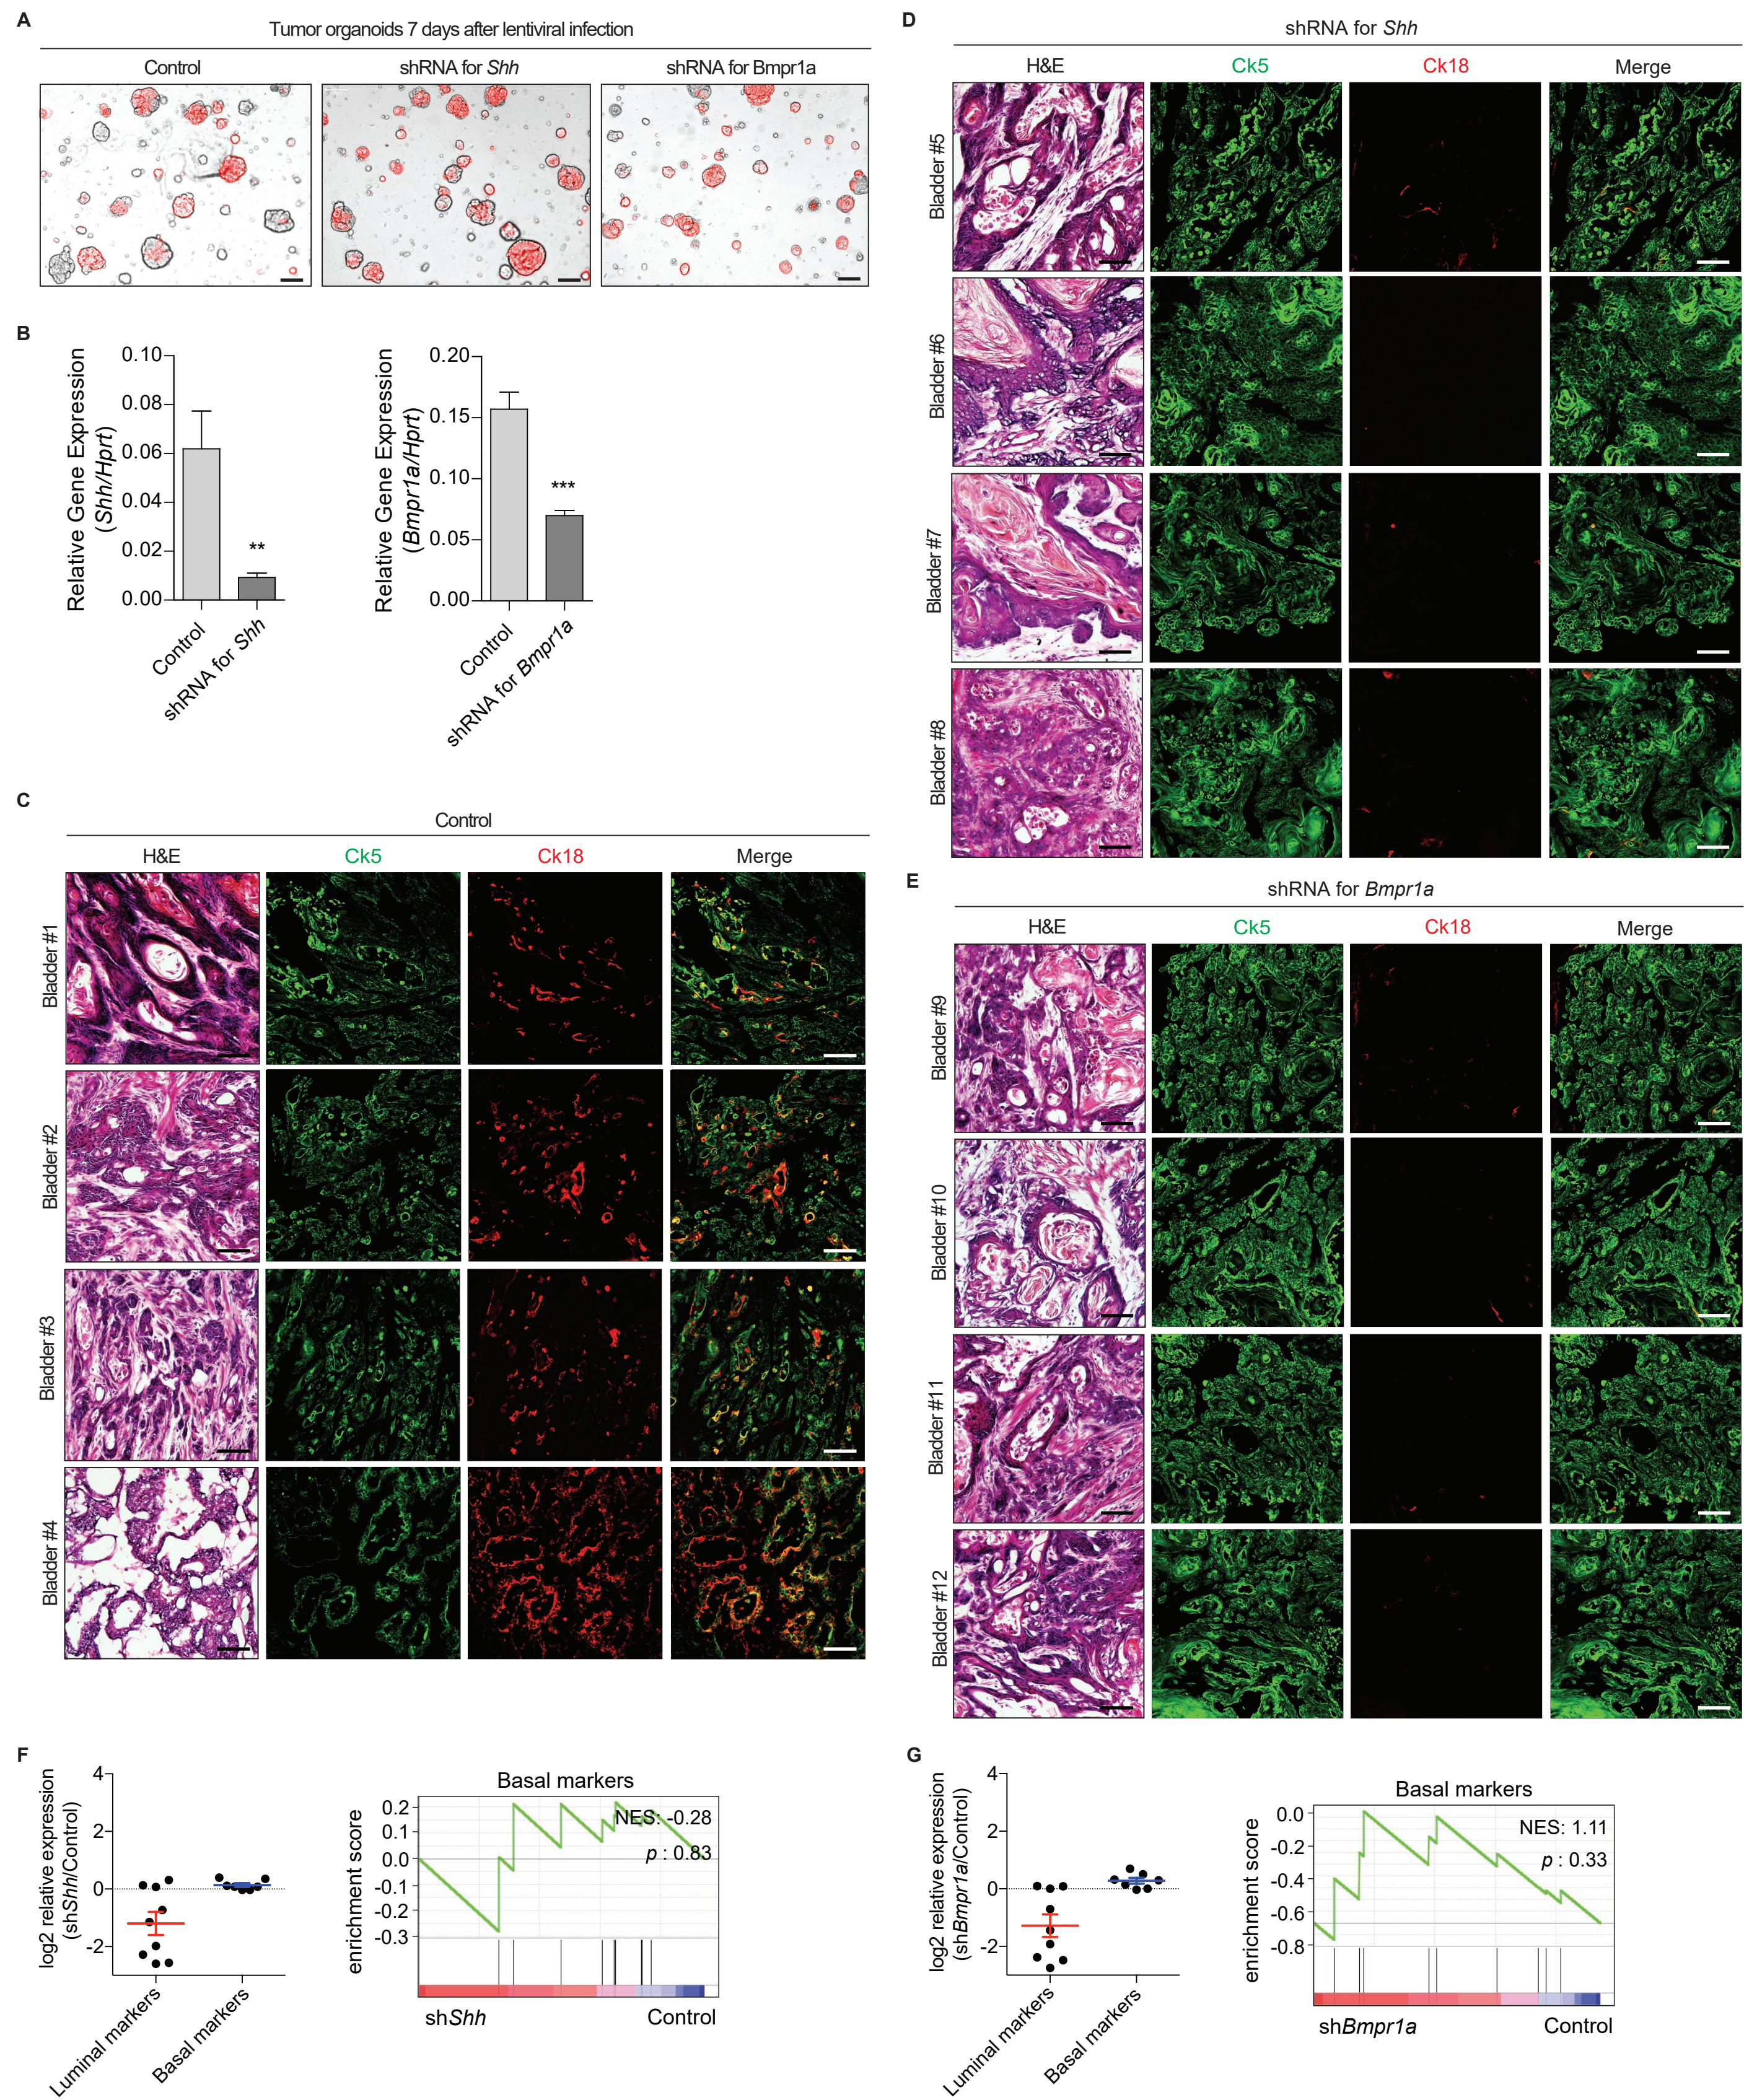

Supplement: supp [file elife_poa_e43024_Figure_5_figure_supplement_1.pdf › elife_poa_e43024_Figure_5_figure_supplement_1.pdf]

Figure 5-figure supplement 2

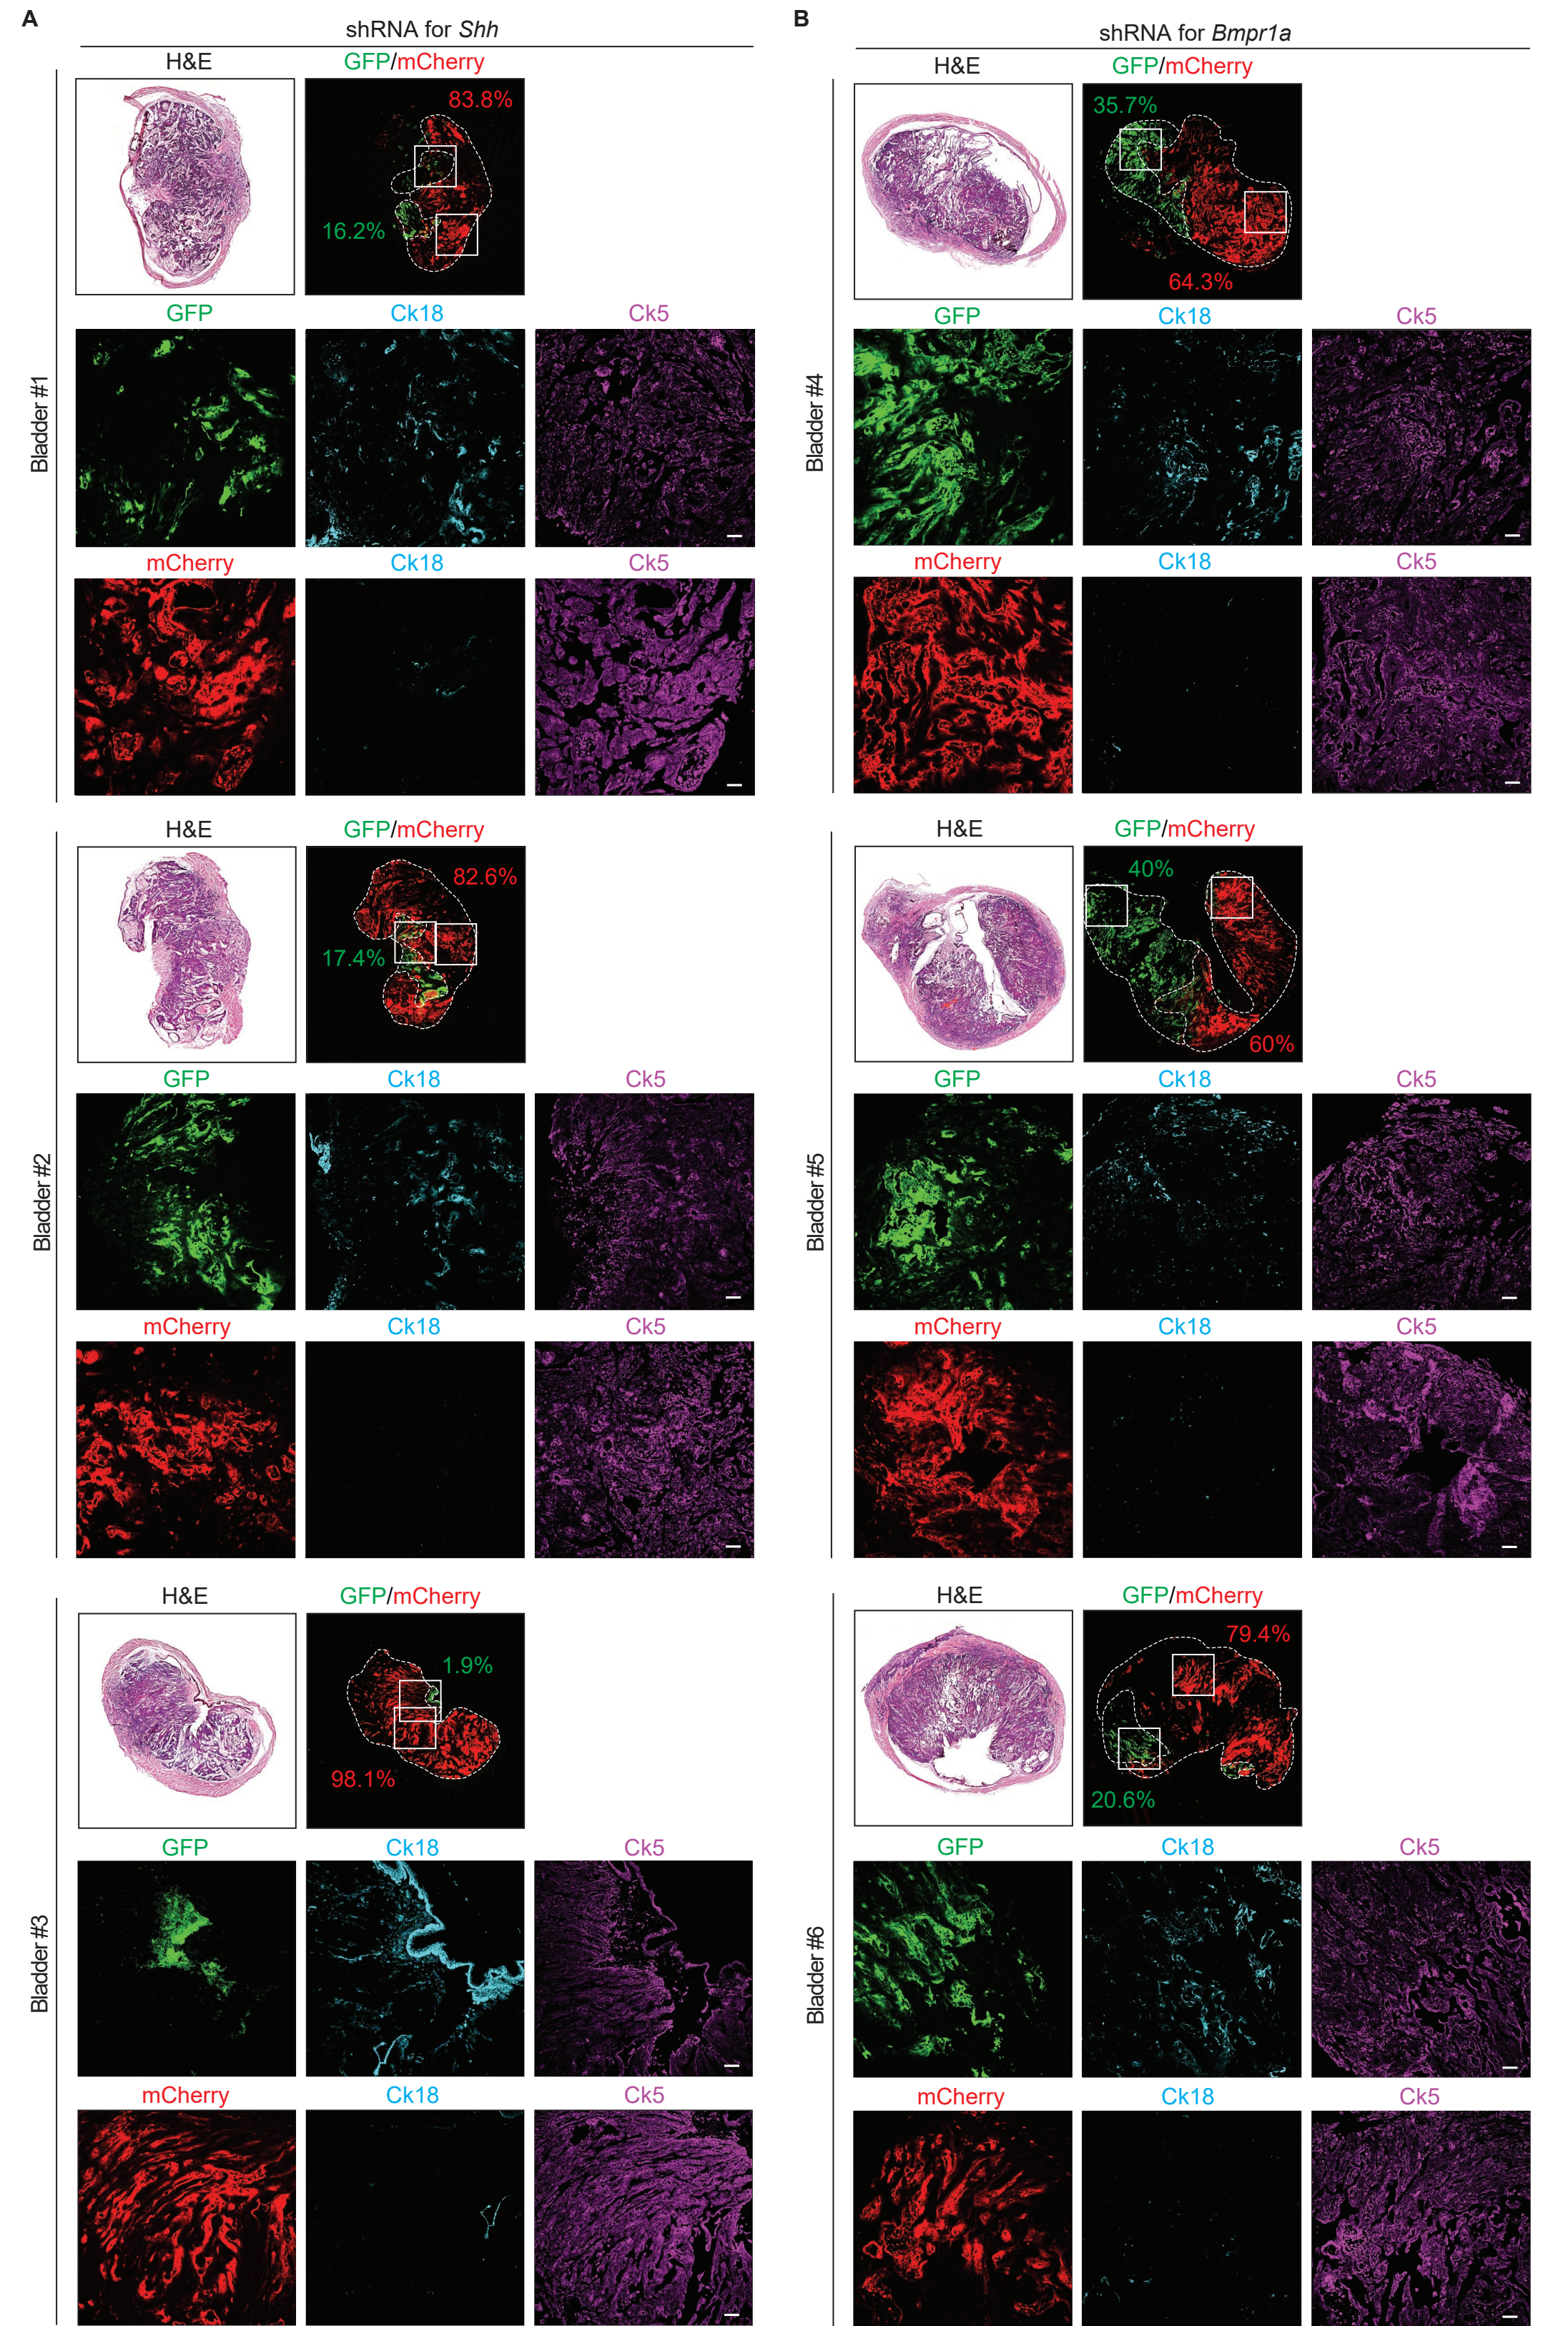

Supplement: supp [file elife_poa_e43024_Figure_5_figure_supplement_2.pdf › elife_poa_e43024_Figure_5_figure_supplement_2.pdf]

Figure 5-figure supplement 3

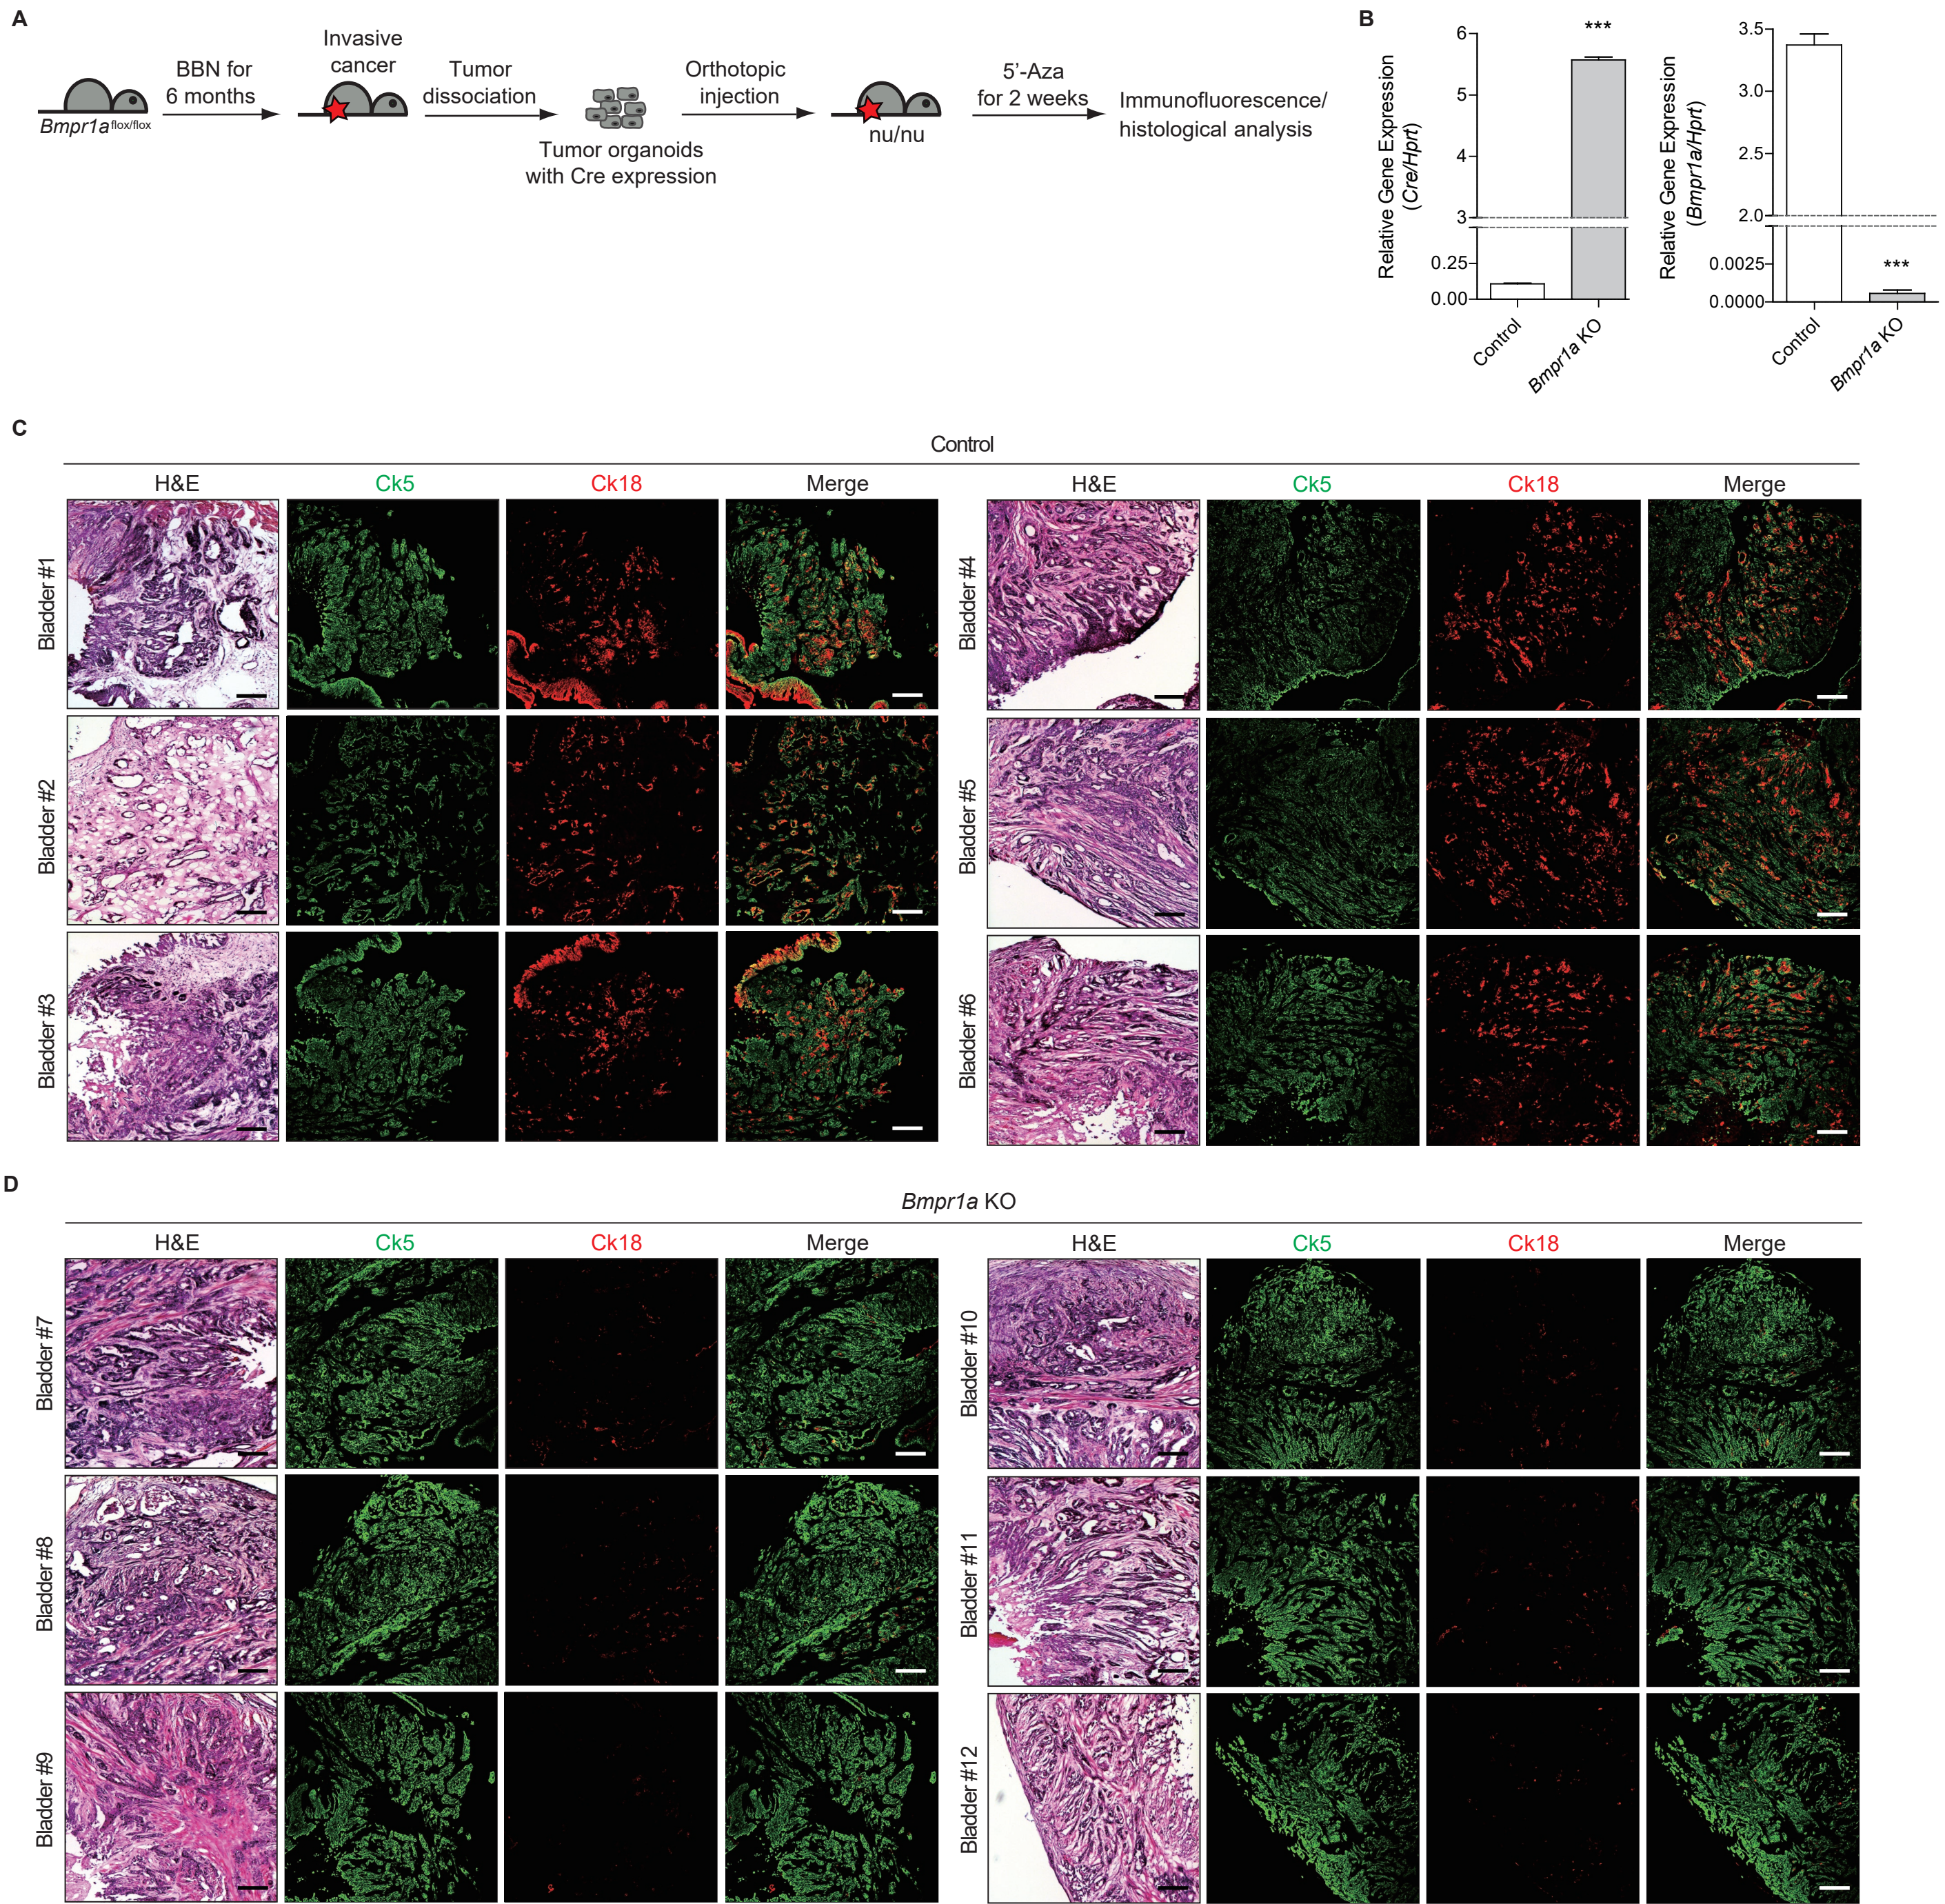

Supplement: supp [file elife_poa_e43024_Figure_5_figure_supplement_3.pdf › elife_poa_e43024_Figure_5_figure_supplement_3.pdf]

Figure 6-figure supplement 1

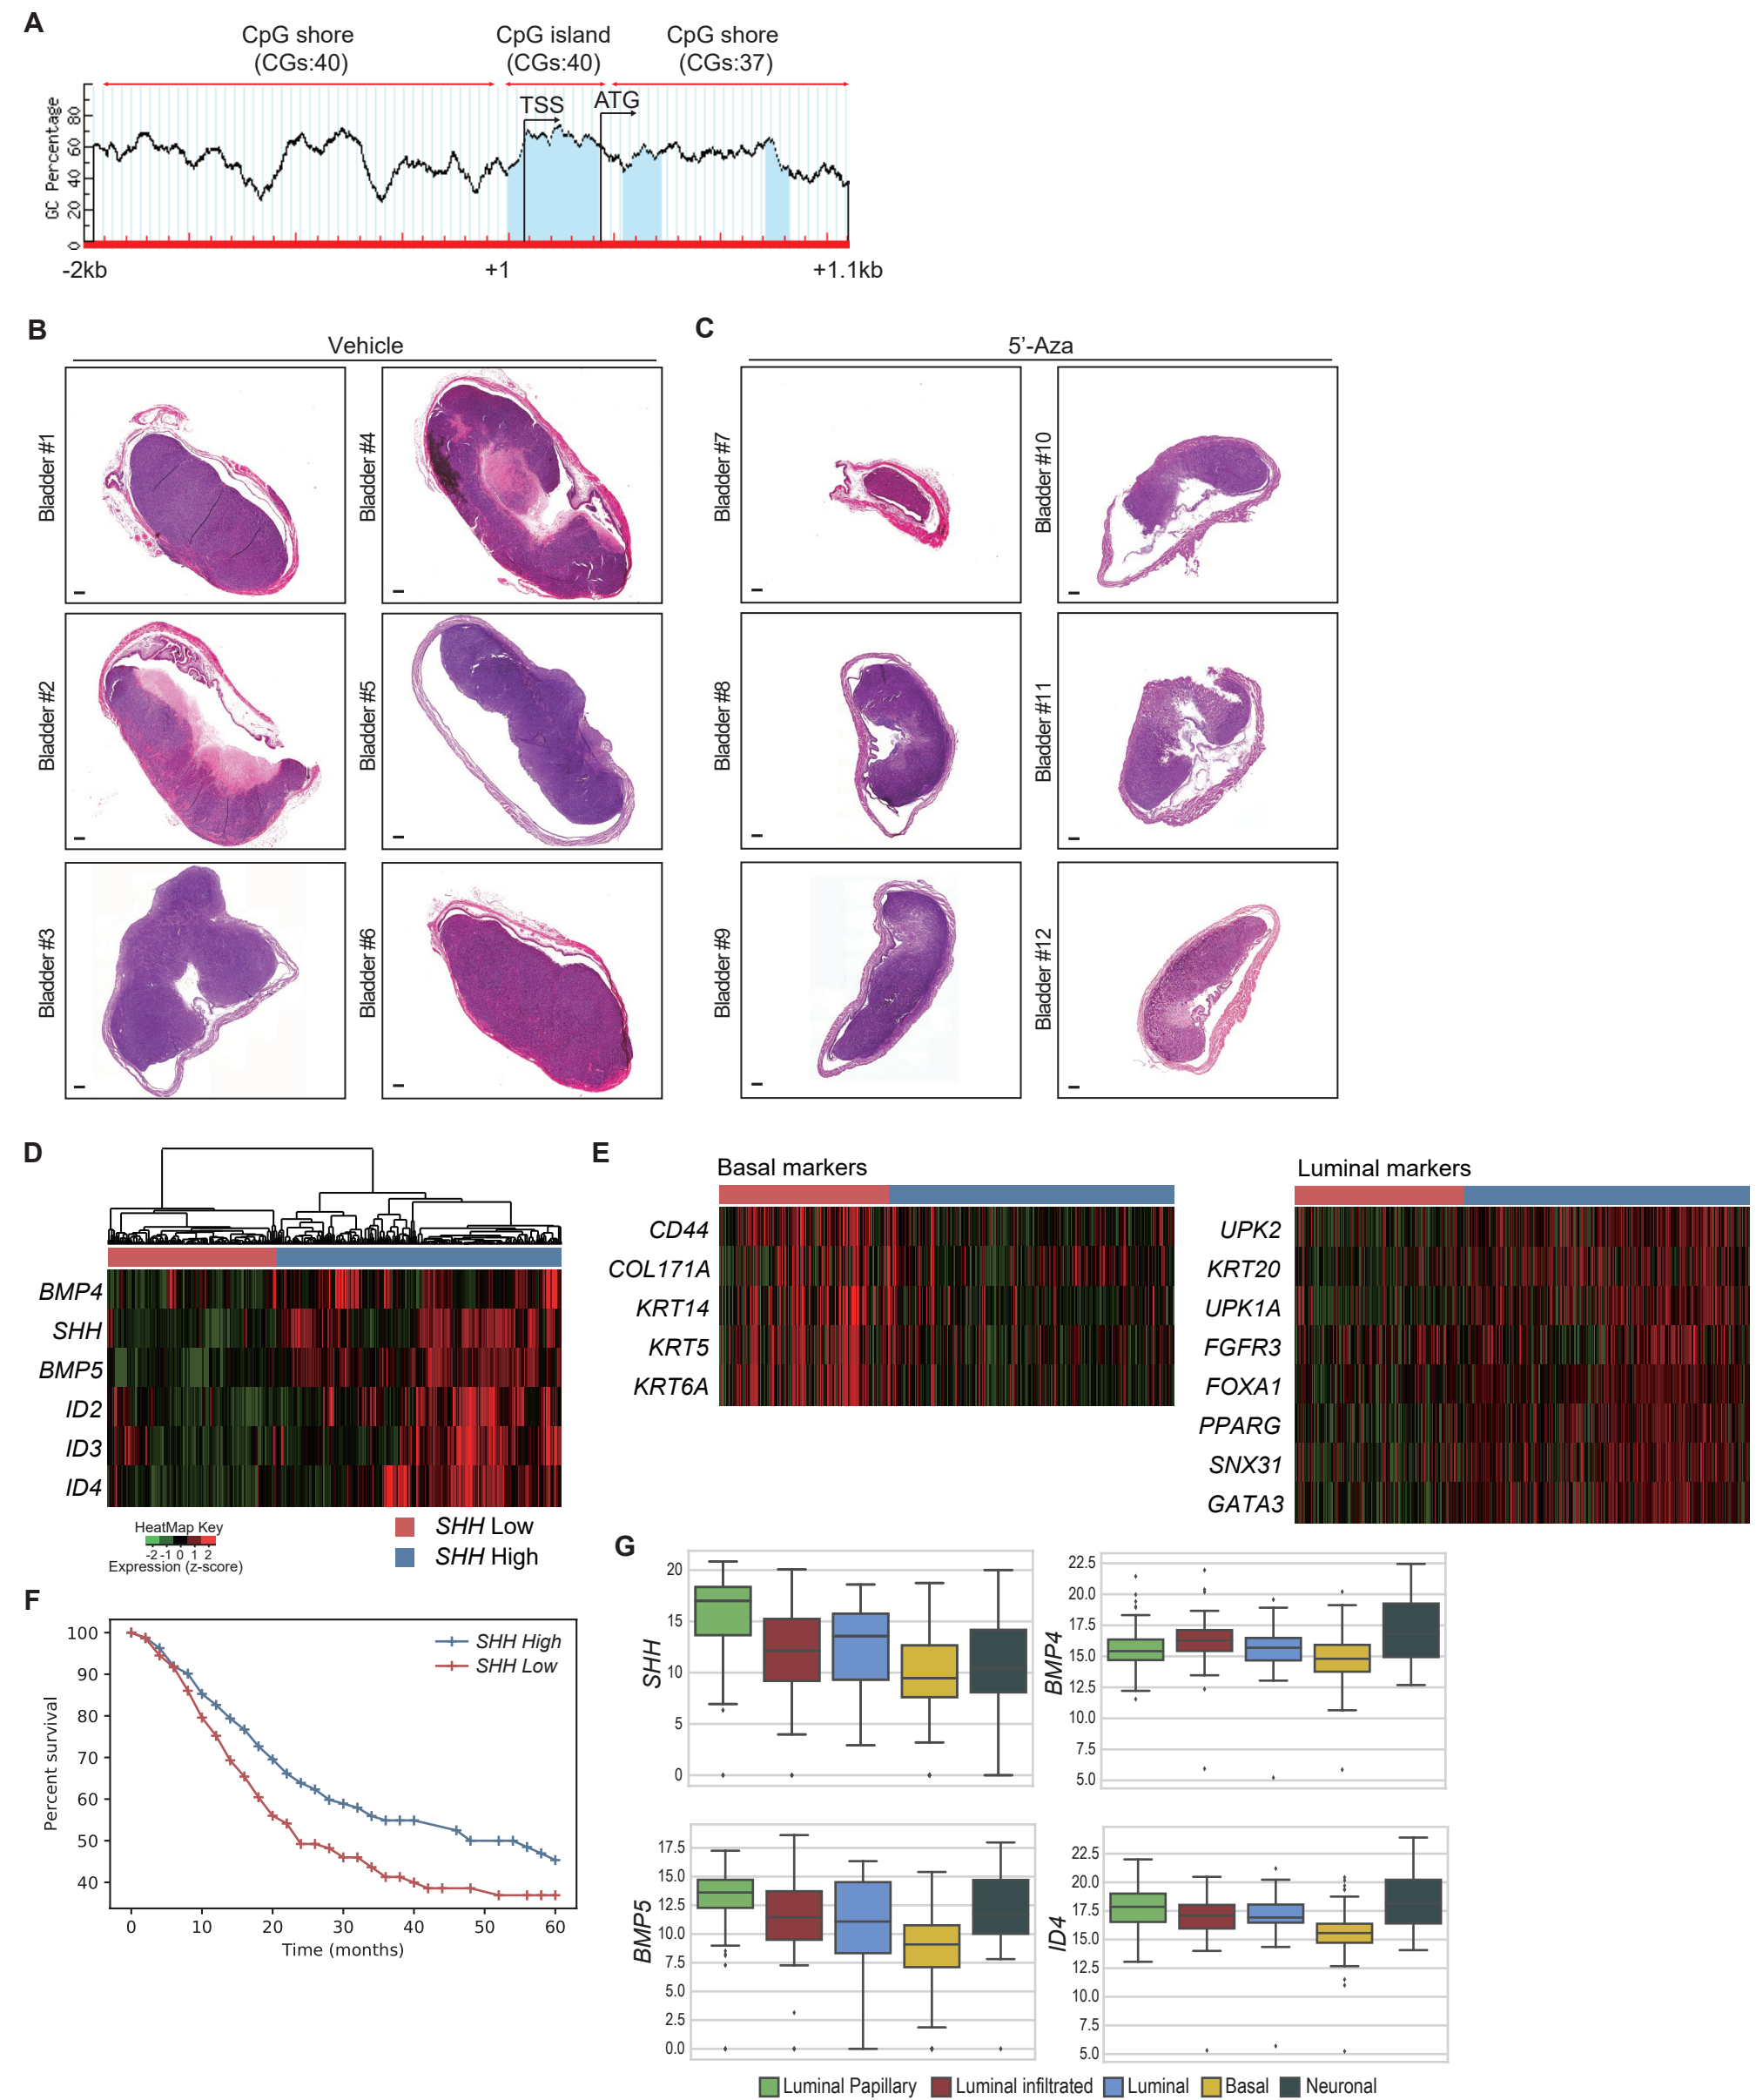

Supplement: supp [file elife_poa_e43024_Figure_6_figure_supplement_1.pdf › elife_poa_e43024_Figure_6_figure_supplement_1.pdf]

Figure 7-figure supplement 1

Basal tumors

P-1

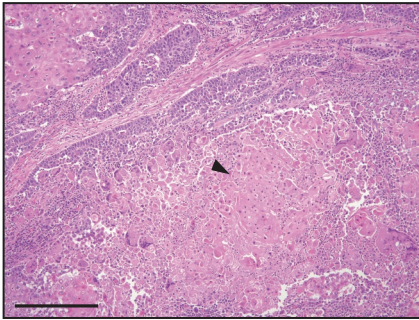

P-2

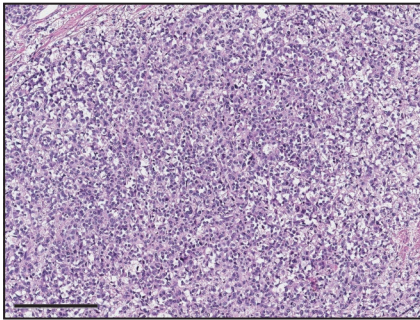

P-4

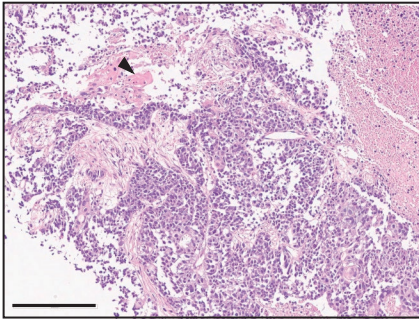

P-5

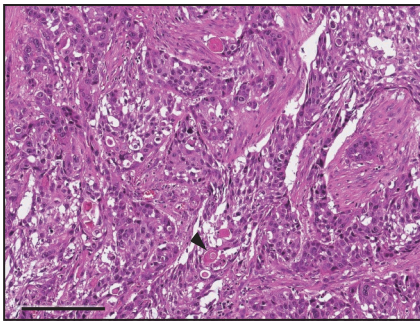

P-10

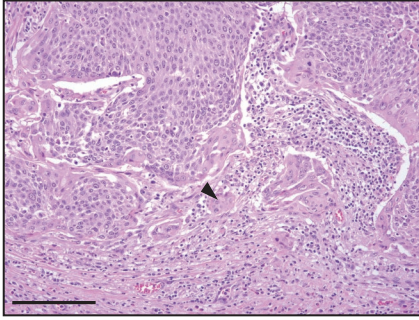

Luminal tumors

P-3

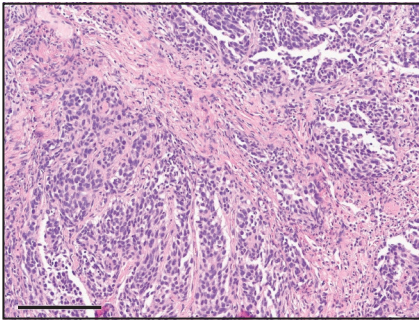

P-7

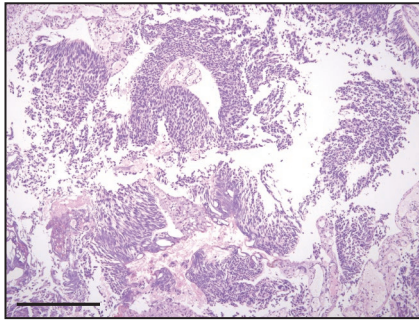

P-8

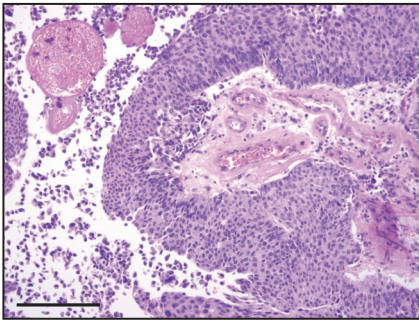

P-9

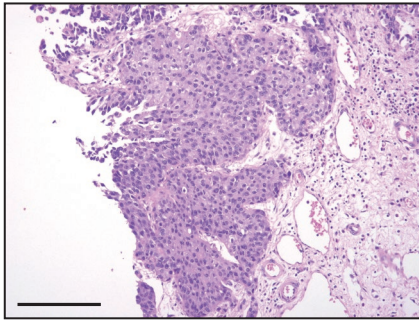

Supplement: supp [file elife_poa_e43024_Figure_7_figure_supplement_1.pdf › elife_poa_e43024_Figure_7_figure_supplement_1.pdf]
